# Supplementary material for: Distinct gene regulatory programs define the inhibitory effects of liver X receptors and PPARG on cancer cell proliferation
Source: PubMed Central journal article supplement (PMC4940857; doi:10.1186/s13073-016-0328-6), 2016-07-11

## **SUPPLEMENTAL FIGURES**

### **Distinct gene regulatory programs define the inhibitory effects of LXRs and PPARG on cancer cell proliferation**

Daniel Savic<sup>1</sup>, Ryne C. Ramaker<sup>1,2</sup>, Brian S. Roberts<sup>1</sup>, Todd C. Burwell<sup>1</sup>, Emma C. Dean<sup>1</sup>, Sarah K. Meadows<sup>1</sup>, Sara J. Cooper<sup>1</sup>, Michael J. Garabedian<sup>3</sup>, Jason Gertz<sup>4</sup> and Richard M. Myers<sup>1</sup>

**(1)** HudsonAlpha Institute for Biotechnology, Huntsville, AL 35806

**(2)** Department of Genetics, University of Alabama at Birmingham, Birmingham, AL, 35294

**(3)** Departments of Microbiology and Urology, New York University, New York, NY, 10016

**(4)** Department of Oncological Sciences, Huntsman Cancer Institute, University of Utah, Salt Lake City, UT, 84112

## TABLE OF CONTENTS

|                                  |           |
|----------------------------------|-----------|
| Table of Contents.....           | Page 2    |
| Supplemental Figure Legends..... | Page 3-14 |
| Figure S1.....                   | Page 15   |
| Figure S2.....                   | Page 16   |
| Figure S3.....                   | Page 17   |
| Figure S4.....                   | Page 18   |
| Figure S5.....                   | Page 19   |
| Figure S6.....                   | Page 20   |
| Figure S7.....                   | Page 21   |
| Figure S8.....                   | Page 22   |
| Figure S9.....                   | Page 23   |
| Figure S10.....                  | Page 24   |
| Figure S11.....                  | Page 25   |
| Figure S12.....                  | Page 26   |
| Figure S13.....                  | Page 27   |
| Figure S14.....                  | Page 28   |
| Figure S15.....                  | Page 29   |
| Figure S16.....                  | Page 30   |
| Figure S17.....                  | Page 31   |
| Figure S18.....                  | Page 32   |
| Figure S19.....                  | Page 33   |
| Figure S20.....                  | Page 34   |
| Figure S21.....                  | Page 35   |
| Figure S22.....                  | Page 36   |
| Figure S23.....                  | Page 37   |
| Figure S24.....                  | Page 38   |
| Figure S25.....                  | Page 39   |
| Figure S26.....                  | Page 40   |
| Figure S27.....                  | Page 41   |
| Figure S28.....                  | Page 42   |
| Figure S29.....                  | Page 43   |
| Figure S30.....                  | Page 44   |
| Figure S31.....                  | Page 45   |
| Figure S32.....                  | Page 46   |
| Figure S33.....                  | Page 47   |
| Figure S34.....                  | Page 48   |
| Figure S35.....                  | Page 49   |
| Figure S36.....                  | Page 50   |
| Figure S37.....                  | Page 51   |
| Figure S38.....                  | Page 52   |
| Figure S39.....                  | Page 53   |
| Figure S40.....                  | Page 54   |

## SUPPLEMENTAL FIGURE LEGENDS

### Figure S1. Additional metabolite levels after drug treatment

Relative metabolite abundance after 24 (left) and 48 (right) hours of GW3965 (light blue), rosiglitazone (gold) and DMSO (gray) cell treatments for a variety of cellular metabolites. \*  $p < 0.05$ .

### Figure S2. Comparison of GW3965 and T0901317 agonists

**(A)** Comparisons of fold changes between genes significantly regulated (adjusted  $p < 0.05$ ) by both GW3965 (y-axis) and T0901317 (x-axis). The rank correlation is given at the bottom right of the plot.

**(B)** The number of differentially regulated genes after 24 and 48 hours of drug treatment (adjusted  $p < 0.01$ , fold change cutoff of  $\pm 2$ ). Plots are shown for rosiglitazone and a combination of GW3965 and T0901317 (GW & T0) treatments (adjusted  $p < 0.01$ , fold change cutoff of  $\pm 2$  for both GW3965 and T0901317 treatments).

### Figure S3. Differentially regulated genes at a fold change cutoff of $\pm 1.5$

The number of differentially regulated genes after 24 and 48 hours of drug treatment (adjusted  $p < 0.01$  and fold change cutoff of  $\pm 1.5$ ) is given.

### Figure S4. Gene ontology connectivity map for rosiglitazone

**(A)** Gene Ontology connectivity map for rosiglitazone treatment at 24 hours for up-regulated (red) and down-regulated (red) pathways. **(B)** Gene Ontology connectivity map for rosiglitazone treatment at 48 hours for up-regulated (red) and down-regulated (red) pathways.

### Figure S5. H3K27ac sites gained and lost

**(A)** The number of H3K27ac sites gained (y-axis) after 24 and 48 hours of GW3965 (blue) and rosiglitazone (gold) treatment (x-axis). **(B)** The number of H3K27ac sites lost (y-axis) after 24 and 48 hours of GW3965 (blue) and rosiglitazone (gold) treatment (x-axis).

### Figure S6. Common H3K27ac sites between ligand treatments and pathway enrichments

All GW3965 and rosiglitazone H3K27ac sites gained (compared to control DMSO conditions) were used for this analysis. Venn diagrams display overlap (in gray) between GW3965-gained (in blue) and rosiglitazone-gained (in gold) sites after ligand treatment after 24 hours (A) and after 48 hours (B). Pathway enrichments using GREAT for common H3K27ac sites gained across both drug treatments are shown at 24 hours (C) and 48 hours (D).

### **Figure S7. Dynamic changes to H3K27ac occupancy**

**(A)** Heatmap denotes individual binding sites (y-axis) that exhibited changes in H3K27ac occupancy from control culture conditions (blue, DMSO, x-axis) to 24 hours of GW3965 treatment (green, 24hr, x-axis), and from 24 hours of GW3965 treatment to 48 hours of GW3965 treatment (red, 48hr, x-axis). **(B)** Heatmap denotes individual binding sites (y-axis) that exhibited changes in H3K27ac occupancy from baseline (blue DMSO, x-axis) to 24 hours of rosiglitazone treatment (green, 24hr, x-axis), and from 24 hours of GW3965 treatment to 48 hours of rosiglitazone treatment (red, 48hr, x-axis). For all heatmaps, weaker occupancies are shown in blue while stronger enrichment is given in yellow. Intermediate enrichments are given in black.

### **Figure S8. Enrichment of sites with increasing H3K27ac occupancy near differentially regulated genes**

**(A)** Cumulative distribution functions display the fraction of target gene promoters (y-axis) at different distance cutoffs to the nearest H3K27ac binding event (x-axis). Plots for the promoters of GW3965 responsive up-regulated genes (blue) and down-regulated (red) genes (adjusted  $p < 0.01$ , fold change cutoff of  $\pm 2$ ) are shown. The background distribution using all gene promoters in the genome is also displayed (BKG; black). **(B)** Cumulative distribution functions display the fraction of target gene promoters (y-axis) at different distance cutoffs to the nearest H3K27ac binding event (x-axis). Plots for the promoters of rosiglitazone responsive up-regulated genes (blue) and down-regulated (red) genes (adjusted  $p < 0.01$ , fold change cutoff of  $\pm 2$ ) are shown. The background distribution using all gene promoters in the genome is also displayed (BKG; black).

### **Figure S9. Enrichment of sites with increasing H3K27ac occupancy near differentially regulated high-confidence LXR genes**

Cumulative distribution functions display the fraction of target gene promoters (y-axis) at different distance cutoffs to the nearest H3K27ac binding event (x-axis). Plots for the promoters of GW3965+T0901317 responsive up-regulated genes (blue) and down-regulated (red) genes (adjusted  $p < 0.01$ , fold change cutoff of  $\pm 2$  for both GW3965 and T0901317 drug treatments) are shown. The background distribution using all gene promoters in the genome is also displayed (BKG; black).



**Figure S10. Pathway analysis of H3K27ac sites exhibiting increased temporal occupancy during GW3965 treatment**

(A) Significant Gene Ontology Biological Process pathway analysis using GREAT for H3K27ac sites that exhibited increasingly stronger enrichment during GW3965 drug treatments. (B) Significant Gene Ontology Disease Ontology pathway analysis using GREAT for H3K27ac sites that exhibited increasingly stronger enrichment during GW3965 drug treatments.

**Figure S11. Pathway analysis of H3K27ac sites exhibiting increased temporal occupancy during rosiglitazone treatment**

(A) Significant Gene Ontology Biological Process pathway analysis using GREAT for H3K27ac sites that exhibited increasingly stronger enrichment during rosiglitazone drug treatments. (B) Significant Gene Ontology Disease Ontology pathway analysis using GREAT for H3K27ac sites that exhibited increasingly stronger enrichment during rosiglitazone drug treatments.

**Figure S12. AP1 motif enrichment and JunD co-occupancy at LXRA sites**

(A) The fold enrichment of various canonical motifs for the top 50% of ranked LXRA binding sites exhibiting stronger enrichment at 2 hours (light green) or 48 hours (dark green) of GW3965 treatment. (B) The percentage of JunD sites overlapping with LXRA nuclear receptor (NR) binding events after 2 and 48 hours of GW3965 treatment. Sites overlapping with nuclear receptors are in blue while sites not overlapping nuclear receptors are in red. (C) The percentage of LXRA sites after 2 and 48 hours of stimulation coincident with JunD binding.

**Figure S13. Integration of nuclear receptor binding data with drug responsive genes (fold change cutoff of +/-1.5)**

Cumulative distribution functions display the fraction of target gene promoters (y-axis) at different distance cutoffs to the nearest LXRA, LXR<sub>B</sub> and PPARG binding event (x-axis). Plots for the promoters of drug responsive up-regulated genes (green) and down-regulated genes (red) are shown (adjusted  $p < 0.01$ , fold change cutoff of +/-1.5). The background distribution using all gene promoters in the genome is also displayed (Bkgd; black). The left panel represents 2-hour ChIP-seq data compared to 24-hour RNA-seq data while the right panel compares 48-hour ChIP-seq and RNA-seq data. For LXR analyses, only high-confidence GW3965+T0901317 responsive genes differentially regulated by both GW3965 and T0901317 were used. Down-regulated curves are absent for 24-hour LXR functions as only five genes were identified.

**Figure S14. Integration of LXR binding data with 48-hour GW3965+T0901317 repressed genes not up-regulated at 24 hours**

Cumulative distribution functions display the fraction of target gene promoters (y-axis) at different distance cutoffs to the nearest LXRA and LXR B binding event (x-axis). Plots for the promoters of GW3965+T0901317 repressed genes (adjusted  $p < 0.01$ ) are shown. ChIP-seq and RNA-seq data at 48 hours were used. Plots of all 48-hour GW3965+T0901317 down-regulated genes (red), as well as 48-hour repressed genes that were not up-regulated (adjusted  $p < 0.05$ ) at 24 hours (dark red) are shown. The background distribution using all gene promoters in the genome is also displayed (Bkgd; black). The top panel uses RNA-seq data using a fold change cutoff of  $\pm 1.5$  (for both GW3965 and T0901317) while the bottom panel uses a fold change cutoff of  $\pm 2$  (for both GW3965 and T0901317).

**Figure S15. Integration of LXR binding data with GW3965 responsive genes (fold change cutoff of  $\pm 2$ )**

Cumulative distribution functions display the fraction of target gene promoters (y-axis) at different distance cutoffs to the nearest LXRA and LXR B binding event (x-axis). Plots for the promoters of GW3965 up-regulated genes (green) and repressed genes (red) are shown (adjusted  $p < 0.01$ , fold change cutoff of  $\pm 2$ ). The background distribution using all gene promoters in the genome is also displayed (Bkgd; black). The top panel represents 2-hour ChIP-seq data compared to 24-hour RNA-seq data while the bottom panel compares 48-hour ChIP-seq and RNA-seq data.

**Figure S16. Integration of LXR binding data with GW3965 responsive genes (fold change cutoff of  $\pm 1.5$ )**

Cumulative distribution functions display the fraction of target gene promoters (y-axis) at different distance cutoffs to the nearest LXRA and LXR B binding event (x-axis). Plots for the promoters of GW3965 up-regulated genes (green) and repressed genes (red) are shown (adjusted  $p < 0.01$ , fold change cutoff of  $\pm 1.5$ ). The background distribution using all gene promoters in the genome is also displayed (Bkgd; black). The top panel represents 2-hour ChIP-seq data compared to 24-hour RNA-seq data while the bottom panel compares 48-hour ChIP-seq and RNA-seq data.

**Figure S17. Integration of LXR binding data with 48-hour GW3965 repressed genes not up-regulated at 24 hours**

Cumulative distribution functions display the fraction of target gene promoters (y-axis) at different distance cutoffs to the nearest LXRA and LXR B binding event (x-axis). Plots for the promoters of

GW3965 repressed genes (adjusted  $p < 0.01$ ) are shown. ChIP-seq and RNA-seq data at 48 hours were used. Plots using all down-regulated genes at 48 hours (red) as well as 48-hour repressed genes that were not up-regulated (adjusted  $p < 0.05$ ) at 24 hours (dark red) are shown. The background distribution using all gene promoters in the genome is also displayed (Bkgd; black). The top panel uses RNA-seq data using a fold change of  $\pm 1.5$  while the bottom panel uses a fold change of  $\pm 2$ .

**Figure S18. Integration of RNAP2 and LXR binding site co-occupancy with 48-hour GW3965+T0901317 repressed genes not up-regulated at 24 hours**

Cumulative distribution functions display the fraction of target gene promoters (y-axis) at different distance cutoffs to the nearest LXRA and LXR binding event (x-axis). Plots for the promoters of 48-hour GW3965+T0901317 repressed genes (adjusted  $p < 0.01$ , fold change cutoff of  $-2$  for both GW3965 and T0901317 treatments) are shown. ChIP-seq and RNA-seq data at 48 hours were used. All 48-hour repressed genes that were not up-regulated (adjusted  $p < 0.05$ ) were utilized. LXRA binding events coincident with RNAP2 are in dark purple (+RNAP2), while LXRA sites devoid of RNAP2 occupancy are denoted in pink (-RNAP2). The background distribution using all gene promoters in the genome for sites overlapping with RNAP2 (+RNAP2 Bkgd; black) or for sites devoid of RNAP2 (-RNAP2 Bkgd; gray) is also graphed.

**Figure S19. Integration of RNAP2 and LXR binding site co-occupancy with 48-hour GW3965 repressed genes not up-regulated at 24 hours**

Cumulative distribution functions display the fraction of target gene promoters (y-axis) at different distance cutoffs to the nearest LXRA and LXR binding event (x-axis). Plots for the promoters of 48-hour GW3965 repressed genes (adjusted  $p < 0.01$ , fold change cutoff of  $-2$ ) at different distances (x-axis) are shown. ChIP-seq and RNA-seq data at 48 hours were used. All 48-hour repressed genes that were not up-regulated (adjusted  $p < 0.05$ ) at 24 hours were utilized. LXRA binding events coincident with RNAP2 are in dark purple (+RNAP2), while LXRA sites devoid of RNAP2 occupancy are denoted in pink (-RNAP2). The background distribution using all gene promoters in the genome for sites overlapping with RNAP2 (+RNAP2 Bkgd; black) or for sites devoid of RNAP2 (-RNAP2 Bkgd; gray) is also graphed.

**Figure S20. Integration of RNAP2 and PPARG binding site co-occupancy with 24-hour rosiglitazone up-regulated genes**

Cumulative distribution functions display the fraction of target gene promoters (y-axis) at different distance cutoffs to the nearest PPARG binding event (x-axis). Plots for the promoters of 24-hour

rosiglitazone up-regulated genes (adjusted  $p < 0.01$ , fold change cutoff of 2) are shown. ChIP-seq at 2 hours and RNA-seq data at 24 hours were used. PPARG binding events coincident with RNAP2 are in dark purple (PPARG+RNAP2), while LXRA sites devoid of RNAP2 occupancy are denoted in pink (PPARG-RNAP2). The background distribution using all gene promoters in the genome for sites overlapping with RNAP2 (PPARG+RNAP2 Bkgd; black) or for sites devoid of RNAP2 (PPARG-RNAP2 Bkgd; gray) is also graphed. At the bottom right, the percentage of PPARG binding sites that co-occurred with RNAP2 is shown in the pie chart (green).

**Figure S21. Integration of H3K27ac and nuclear receptor binding site co-occupancy with drug responsive genes**

**(A)** Cumulative distribution functions display the fraction of target gene promoters (y-axis) at different distance cutoffs to the nearest LXRA and LXR<sub>B</sub> binding event (x-axis). Plots for the promoters of 48-hour GW3965+T0901317 repressed genes (adjusted  $p < 0.01$ , fold change cutoff of -2 for both GW3965 and T0901317 treatments) are shown. ChIP-seq and RNA-seq data at 48 hours were used. LXRA and LXR<sub>B</sub> binding events coincident with H3K27ac are in dark purple (LXR+H3K27ac), while LXR sites devoid of H3K27ac occupancy are denoted in pink (LXR-H3K27ac). The background distribution using all gene promoters in the genome for sites overlapping with H3K27ac (+H3K27ac Bkgd; black) or for sites devoid of H3K27ac (-H3K27ac Bkgd; gray) is also graphed. **(B)** Cumulative distribution functions display the fraction of target gene promoters (y-axis) at different distance cutoffs to the nearest PPARG binding event (x-axis). Plots for the promoters of 24-hour rosiglitazone up-regulated genes ( $p < 0.01$ , fold change cutoff of 2) are shown. ChIP-seq data at 2 hours and RNA-seq data at 24 hours were used. PPARG binding events coincident with H3K27ac are in dark purple (PPARG+H3K27ac), while PPARG sites devoid of H3K27ac occupancy are denoted in pink (PPARG-H3K27ac). The background distribution using all gene promoters in the genome for sites overlapping with H3K27ac (+H3K27ac Bkgd; black) or for sites devoid of H3K27ac (-H3K27ac Bkgd; gray) is also graphed.

**Figure S22. Integration of H3K27ac and LXR binding site co-occupancy with 48-hour GW3965 repressed genes (fold change cutoff of -2)**

Cumulative distribution functions display the fraction of target gene promoters (y-axis) at different distance cutoffs to the nearest LXRA and LXR<sub>B</sub> binding event (x-axis). Plots for the promoters of 48-hour GW3965 repressed genes (adjusted  $p < 0.01$ , fold change cutoff of -2) are shown. ChIP-seq and RNA-seq data at 48 hours were used. LXRA and LXR<sub>B</sub> binding events coincident with H3K27ac are in dark purple (LXR+H3K27ac), while LXR sites devoid of H3K27ac occupancy are denoted in pink (LXR-H3K27ac). The background distribution using all gene promoters in the genome for sites overlapping

with H3K27ac (+H3K27ac Bkgd; black) or for sites devoid of H3K27ac (-H3K27ac Bkgd; gray) is also graphed.

**Figure S23. Integration of H3K27ac and LXR binding site co-occupancy with 48-hour GW3965 repressed genes not up-regulated at 24 hours**

Cumulative distribution functions display the fraction of target gene promoters (y-axis) at different distance cutoffs to the nearest LXRA and LXR B binding event (x-axis). Plots for the promoters of 48-hour GW3965 repressed genes ( $p < 0.01$ , fold change cutoff of -2) are shown. ChIP-seq and RNA-seq data at 48 hours were used. All 48-hour down-regulated genes that were not up-regulated (adjusted  $p < 0.05$ ) at 24 hours were utilized. LXRA and LXR B binding events coincident with H3K27ac are in dark purple (LXR+H3K27ac), while LXR sites devoid of H3K27ac occupancy are denoted in pink (LXR-H3K27ac). The background distribution using all gene promoters in the genome for sites overlapping with H3K27ac (+H3K27ac Bkgd; black) or for sites devoid of H3K27ac (-H3K27ac Bkgd; gray) is also graphed.

**Figure S24. Integration of H3K27ac and nuclear receptor binding site co-occupancy with all additional drug responsive gene sets**

Cumulative distribution functions (CDFs) display the fraction of target gene promoters (y-axis) at different distance cutoffs to the nearest LXRA (A), LXR B (B) and PPARG (C) binding event (x-axis). Plots for the promoters of 24-hour (first panel) and 48-hour (second panel) GW3965+T0901317 activated genes (adjusted  $p < 0.01$ , fold change cutoff of 2 for both GW3965 and T0901317 treatments) are shown in (A) and (B). For PPARG (C), CDFs using 24-hour rosiglitazone repressed genes (first panel, adjusted  $p < 0.01$ , fold change cutoff of -2), 48-hour rosiglitazone activated genes (second panel, adjusted  $p < 0.01$ , fold change cutoff of 2) and 48-hour rosiglitazone repressed genes (third panel, adjusted  $p < 0.01$ , fold change cutoff of -2) are shown.

**Figure S25. Integration of JunD and LXR binding site co-occupancy with 48-hour GW3965+T0901317 repressed genes**

Cumulative distribution functions display the fraction of target gene promoters (y-axis) at different distance cutoffs to the nearest LXRA and LXR B binding event (x-axis). Plots for the promoters of 48-hour GW3965+T0901317 repressed genes ( $p < 0.01$  and a fold change cutoff of -2 for both GW3965 and T0901317 treatments) are shown. ChIP-seq and RNA-seq data at 48 hours were used. LXRA and LXR B binding events coincident with JunD are in green (LXR+JunD), while LXR sites devoid of JunD occupancy are denoted in pink (LXR-JunD). The background distribution using all gene promoters in

the genome for sites overlapping with JunD (+JunD Bkgd; black) or for sites devoid of JunD (-JunD Bkgd; gray) is also graphed.

**Figure S26. H3K27ac read enrichment at nuclear receptor binding sites**

Histogram depicts the read depth ratios (x-axis) of H3K27ac enrichment at LXRA, LXR $\beta$  and PPAR $\gamma$  binding sites at 24 hours (top panel) and 48 hours (bottom panel). Negative values highlight stronger enrichment under control culture conditions (DMSO, 0 hours) while positive values denote stronger enrichment after drug treatment (24 or 48 hours of drug treatment).

**Figure S27. Correlation of gene expression with RNAP2 promoter ChIP-seq enrichment**

**(A)** Plot depicts correlation of gene expression (x-axis, RNA-seq RPKM) with RNAP2 promoter enrichment (y-axis, ChIP-seq reads +/-500-bp from TSS) after 24 hours of GW3965 (top panel, blue) and rosiglitazone (bottom panel, gold) treatments. Rank correlations are given in the top left of each plot. **(B)** Plot depicts correlation of gene expression (x-axis, RNA-seq RPKM) with RNAP2 promoter enrichment (y-axis, ChIP-seq reads +/-500-bp from TSS) after 48 hours of GW3965 (top panel, blue) and rosiglitazone (bottom panel, gold) treatments. Rank correlations are given in the top left of each plot.

**Figure S28. Correlation of differentially expressed genes with RNAP2 promoter ChIP-seq enrichment at 24 hours of drug treatment (fold change +/-2)**

**(A)** Smooth scatter plot comparing RNA-derived gene expression levels after 24 hours of GW3965 treatment (y-axis, RPKM) with read depth ratios of ChIP-derived RNAP2 promoter occupancy (x-axis). Read depth at promoters assesses the enrichment after 24 hours of GW3965 treatment (24h) normalized to control culture conditions (0h, DMSO). Data is presented for all GW3965 responsive genes (adjusted  $p < 0.01$ , fold change cutoff of +/-2). **(B)** Smooth scatter plot comparing RNA-derived gene expression levels after 24 hours of rosiglitazone stimulation (y-axis, RPKM) with read depth ratios of ChIP-derived RNAP2 promoter occupancy (x-axis). Read depth at promoters assesses the enrichment after 24 hours of rosiglitazone (24h) normalized to control culture conditions (0h, DMSO). Data is presented for all GW3965 responsive genes (adjusted  $p < 0.01$ , fold change cutoff of +/-2). fc= fold change.

**Figure S29. Correlation of differentially expressed genes with RNAP2 promoter ChIP-seq enrichment after 48 hours of GW3965 treatment (fold change +/-1.5 and +/-1.75)**

(A) Smooth scatter plot comparing RNA-derived gene expression levels after 48 hours of GW3965 stimulation (y-axis, RPKM) with read depth ratios of ChIP-derived RNAP2 promoter occupancy (x-axis). Read depth at promoters assesses the enrichment after 48 hours of GW3965 (48h) normalized to control culture conditions (0h, DMSO). Data is presented for all GW3965 responsive genes (adjusted  $p < 0.01$ , fold change cutoff of +/-1.5). (B) Smooth scatter plot comparing RNA-derived gene expression levels after 48 hours of GW3965 stimulation (y-axis, RPKM) with read depth ratios of ChIP-derived RNAP2 promoter occupancy (x-axis). Read depth at promoters assesses the enrichment after 48 hours of GW3965 (48h) normalized to control culture conditions (0h, DMSO). Data is presented for all GW3965 responsive genes (adjusted  $p < 0.01$ , fold change cutoff of +/-1.75).

**Figure S30. Correlation of differentially expressed genes with RNAP2 promoter ChIP-seq enrichment after 48 hours of rosiglitazone treatment (fold change +/-1.5 and +/-1.75)**

(A) Smooth scatter plot comparing RNA-derived gene expression levels after 48 hours of rosiglitazone stimulation (y-axis, RPKM) with read depth ratios of ChIP-derived RNAP2 promoter occupancy (x-axis). Read depth at promoters assesses the enrichment after 48 hours of rosiglitazone (48h) normalized to control culture conditions (0h, DMSO). Data is presented for all GW3965 responsive genes (adjusted  $p < 0.01$ , fold change cutoff of +/-1.5). (B) Smooth scatter plot comparing RNA-derived gene expression levels after 48 hours of rosiglitazone stimulation (y-axis, RPKM) with read depth ratios of ChIP-derived RNAP2 promoter occupancy (x-axis). Read depth at promoters assesses the enrichment after 48 hours of rosiglitazone (48h) normalized to control culture conditions (0h, DMSO). Data is presented for all GW3965 responsive genes (adjusted  $p < 0.01$ , fold change cutoff of +/-1.75).

**Figure S31. Correlation of RNA-seq and RNAP2 promoter ChIP-seq enrichment between drug responses**

(A) Smooth scatter plot comparing RNA-derived gene expression levels after 48 hours of GW3965 stimulation (y-axis, RPKM) with read depth ratios of ChIP-derived RNAP2 promoter occupancy using rosiglitazone treatment data (x-axis). Read depth at promoters assesses the enrichment after 48 hours of rosiglitazone (ROSI, 48h) normalized to control culture conditions (0h, DMSO). Data is presented for all GW3965 responsive genes (adjusted  $p < 0.01$ , fold change cutoff of +/-2). (B) Smooth scatter plot comparing RNA-derived gene expression levels after 48 hours of rosiglitazone stimulation (y-axis, RPKM) with read depth ratios of ChIP-derived RNAP2 promoter occupancy using GW3965 treatment data (x-axis). Read depth at promoters assesses the enrichment after 48 hours of GW3965 (48h)

normalized to control culture conditions (0h, DMSO). Data is presented for all rosiglitazone responsive genes (adjusted  $p < 0.01$ , fold change cutoff of  $\pm 2$ ). fc= fold change.

**Figure S32. UCSC genome browser image of the *DCBLD2* gene locus.**

The *DCBLD2* genome locus is shown from the UCSC genome browser. Genome coordinates are given above the image. Raw ChIP-seq read enrichments for LXRA and LXR<sub>B</sub> binding after 2 hours and 48 hours is shown. RNAP2 enrichment at baseline (ctrl, DMSO) and after 24 and 48 hours of GW3965 stimulation is displayed. LXR binding exhibits stronger enrichment at 48 hours. At 48 hours, the *DCBLD2* promoter region also displays stronger occupancy, despite this gene being significantly repressed (adjusted  $p < 0.01$ , fold change  $< -2$ ) after 48 hours of GW3965 treatment.

**Figure S33. UCSC genome browser image of the *GADD45A* gene locus.**

The *GADD45A* genome locus is shown from the UCSC genome browser. Genome coordinates are given above the image. Raw ChIP-seq read enrichments for LXRA and LXR<sub>B</sub> binding after 2 hours and 48 hours is shown. RNAP2 enrichment at baseline (ctrl, DMSO) and after 24 and 48 hours of GW3965 stimulation is displayed. LXR binding exhibits stronger enrichment at 48 hours. At 48 hours, the *GADD45A* promoter region also displays stronger occupancy, despite this gene being significantly repressed (adjusted  $p < 0.01$ , fold change  $< -2$ ) after 48 hours of GW3965 treatment.

**Figure S34. UCSC genome browser image of the *PPP1R15A* gene locus.**

The *PPP1R15A* genome locus is shown from the UCSC genome browser. Genome coordinates are given above the image. Raw ChIP-seq read enrichments for LXRA and LXR<sub>B</sub> binding after 2 hours and 48 hours is shown. RNAP2 enrichment at baseline (ctrl, DMSO) and after 24 and 48 hours of GW3965 stimulation is displayed. LXR binding exhibits stronger enrichment at 48 hours. At 48 hours, the *PPP1R15A* promoter region also displays stronger occupancy, despite this gene being significantly repressed (adjusted  $p < 0.01$ , fold change  $< -2$ ) after 48 hours of GW3965 treatment.

**Figure S35. UCSC genome browser image of the *PROSER2* gene locus.**

The *PROSER2* genome locus is shown from the UCSC genome browser. Genome coordinates are given above the image. Raw ChIP-seq read enrichment for LXRA and LXR<sub>B</sub> binding after 2 hours and 48 hours is shown. RNAP2 enrichment at baseline (ctrl, DMSO) and after 24 and 48 hours of GW3965 stimulation is displayed. LXR binding exhibits stronger enrichment at 48 hours. At 48 hours, the *PROSER2* promoter region also displays stronger occupancy, despite this gene being significantly repressed (adjusted  $p < 0.01$ , fold change  $< -2$ ) after 48 hours of GW3965 treatment.



**Figure S36. Correlation of gene expression with H3K36me3 gene body ChIP-seq enrichment**

**(A)** Plot depicts correlation of gene expression (y-axis, RPKM) with H3K36me3 gene body ChIP-seq enrichment (x-axis, average H3K36me3 read depth per base pair in gene body) during control culture conditions (0h, DMSO). Rank correlations are given in the bottom right of each plot. **(B)** Plot depicts correlation of gene expression (y-axis, RPKM) with H3K36me3 gene body ChIP-seq enrichment (x-axis, average H3K36me3 read depth per base pair in gene body) after 48 hours of GW3965 treatment (48h). Rank correlations are given in the bottom right of each plot.

**Figure S37. Correlation of 48-hour GW3965 responsive genes with H3K36me3 gene body ChIP-seq enrichment (fold change cutoff of +/-2)**

Smooth scatter plot comparing RNA-derived gene expression levels after 48 hours of GW3965 stimulation (y-axis, RPKM) with read depth ratios of ChIP-derived H3K36me3 gene body occupancy (x-axis). Read depth at gene bodies assesses the enrichment after 48 hours of GW3965 (48h) normalized to control culture conditions (0h, DMSO). Data is presented for all GW3965 responsive genes (adjusted  $p < 0.01$ , fold change cutoff of +/-2).

**Figure S38. Correlation of 48-hour GW3965 responsive genes with H3K36me3 gene body ChIP-seq enrichment (fold change cutoff of +/-1.75)**

**(A)** Smooth scatter plot comparing RNA-derived gene expression levels after 48 hours of GW3965 stimulation (y-axis, RPKM) with read depth ratios of ChIP-derived H3K36me3 gene body occupancy (x-axis). Read depth at gene bodies assesses the enrichment after 48 hours of GW3965 (48h) normalized to control culture conditions (0h, DMSO). Data is presented for all GW3965 responsive genes (adjusted  $p < 0.01$ , fold change cutoff of +/-1.75). **(B)** Histogram tabulating the read depth ratios (x-axis) of H3K36me3 enrichment in gene bodies for genes repressed after 48 hours of GW3965 treatment. Negative values highlight stronger enrichment during control culture conditions (0h, DMSO) while positive values denote stronger enrichment after 48 hours of GW3965 treatment. Data is presented for all GW3965 responsive genes (adjusted  $p < 0.01$ , fold change cutoff of +/-1.75).

**Figure S39. Correlation of 48-hour GW3965 responsive genes with H3K36me3 gene body ChIP-seq enrichment (fold change cutoff of +/-1.5)**

**(A)** Smooth scatter plot comparing RNA-derived gene expression levels after 48 hours of GW3965 stimulation (y-axis, RPKM) with read depth ratios of ChIP-derived H3K36me3 gene body occupancy (x-

axis). Read depth at gene bodies assesses the enrichment after 48 hours of GW3965 (48h) normalized to control culture conditions (0h, DMSO). Data is presented for all GW3965 responsive genes (adjusted  $p < 0.01$ , fold change cutoff of  $\pm 1.5$ ). **(B)** Histogram tabulating the read depth ratios (x-axis) of H3K36me3 enrichment in gene bodies for genes repressed after 48 hours of GW3965 treatment. Negative values highlight stronger enrichment during control culture conditions (0h, DMSO) while positive values denote stronger enrichment after 48 hours of GW3965 treatment. Data is presented for all GW3965 responsive genes (adjusted  $p < 0.01$ , fold change cutoff of  $\pm 1.5$ ).

**Figure S40. Analysis of RNAP2 enrichment with H3K36me3 gene body ChIP-seq enrichment at 48 hours (fold change cutoff of 1.5)**

**(A)** Violin plot of changes in RNAP2 read depth ratio in gene bodies of down-regulated genes after 48 hours of GW3965 treatment. Plots are displayed for genes that harbor LXRA binding events within 10kb (<10kb) from promoters, as well as plots for genes with no evidence of nearby LXRA occupancy (>100kb). **(B)** Violin plot of changes in RNAP2 read depth ratio in gene bodies of down-regulated genes after 48 hours of GW3965 treatment. Plots are displayed for genes that harbor LXRβ binding events within 10kb (<10kb) from promoters, as well as plots for genes with no evidence of nearby LXRβ occupancy (>100kb).

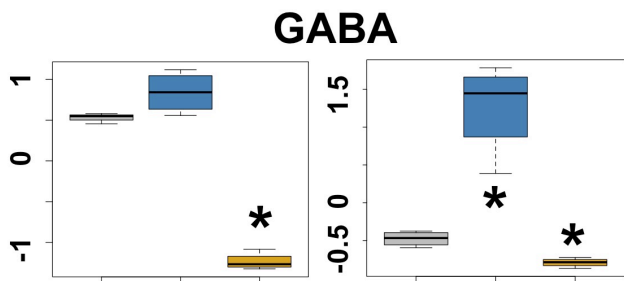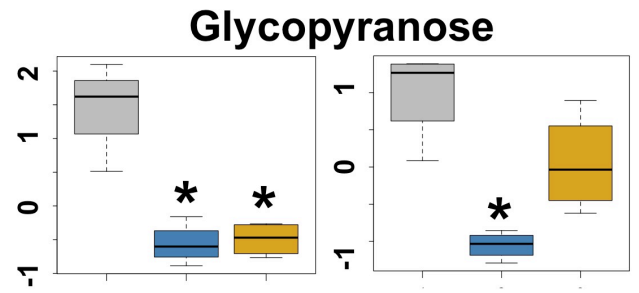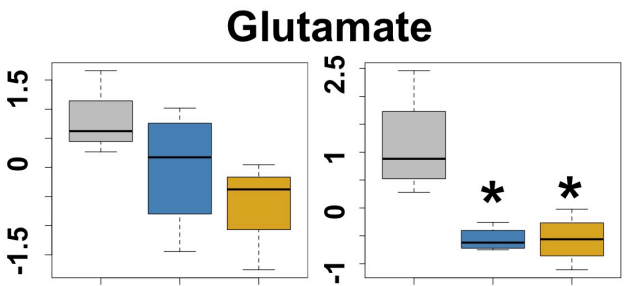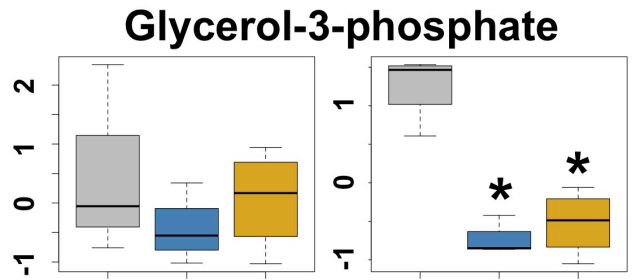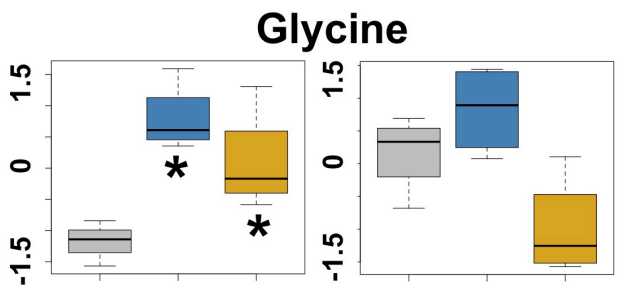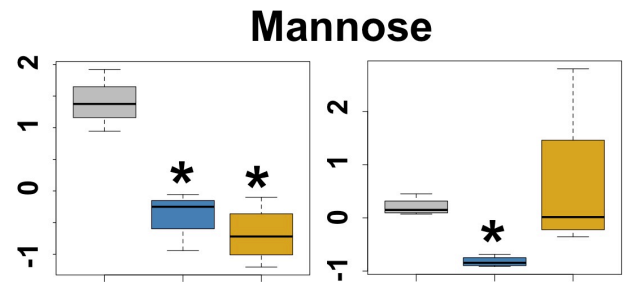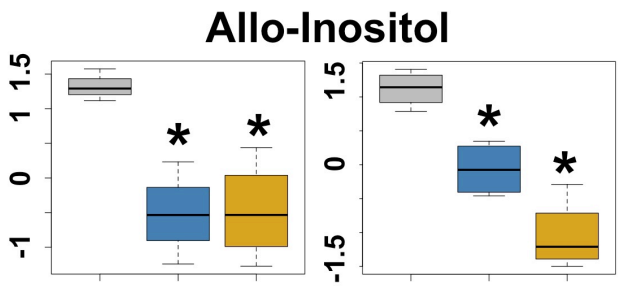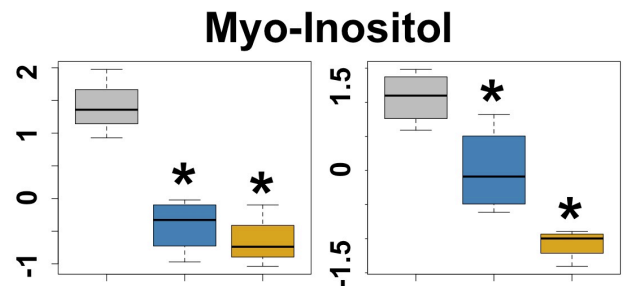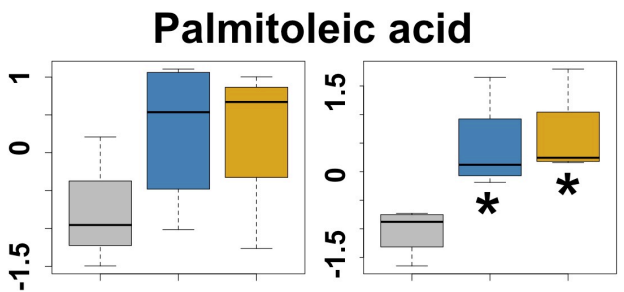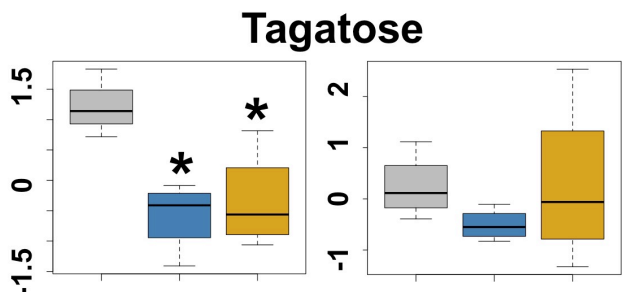

**A**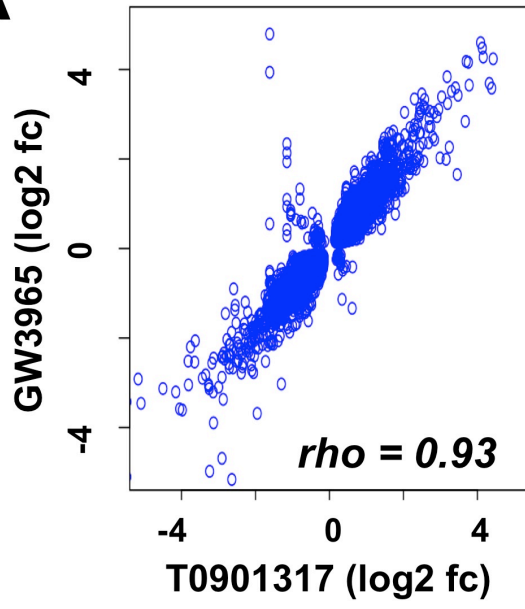**B**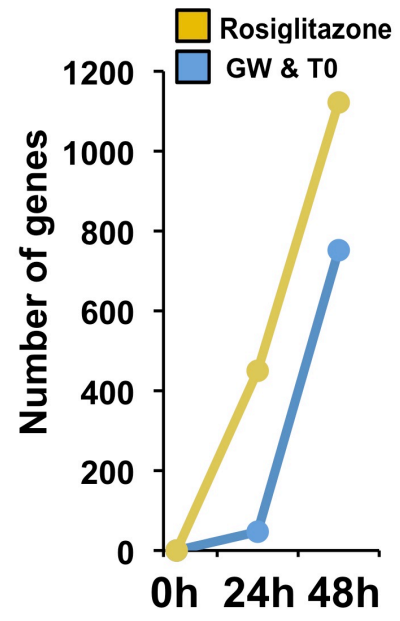

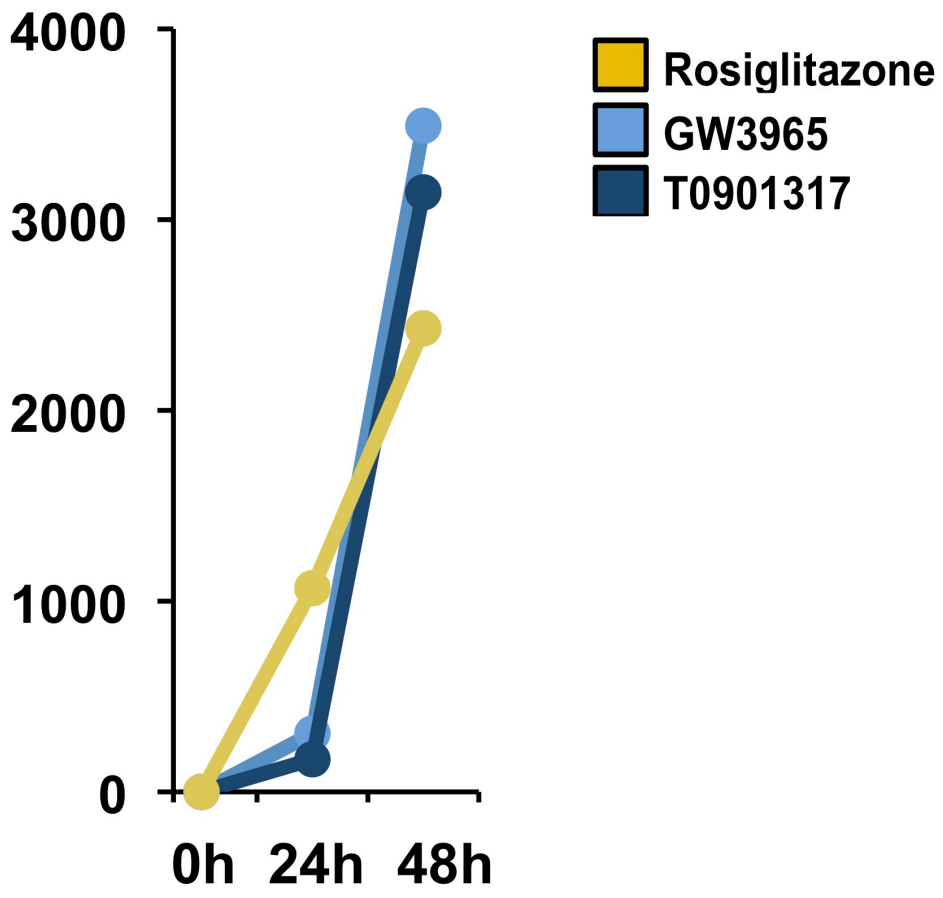

**A**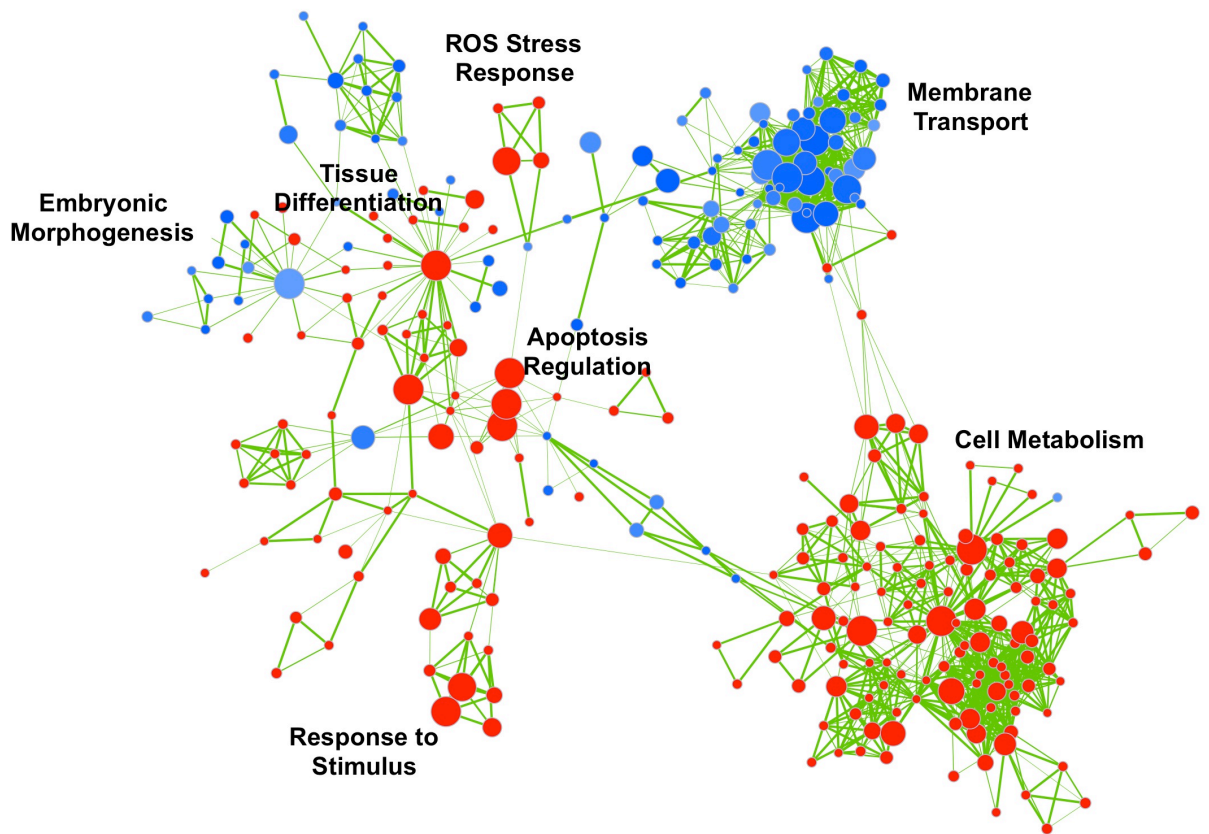**B**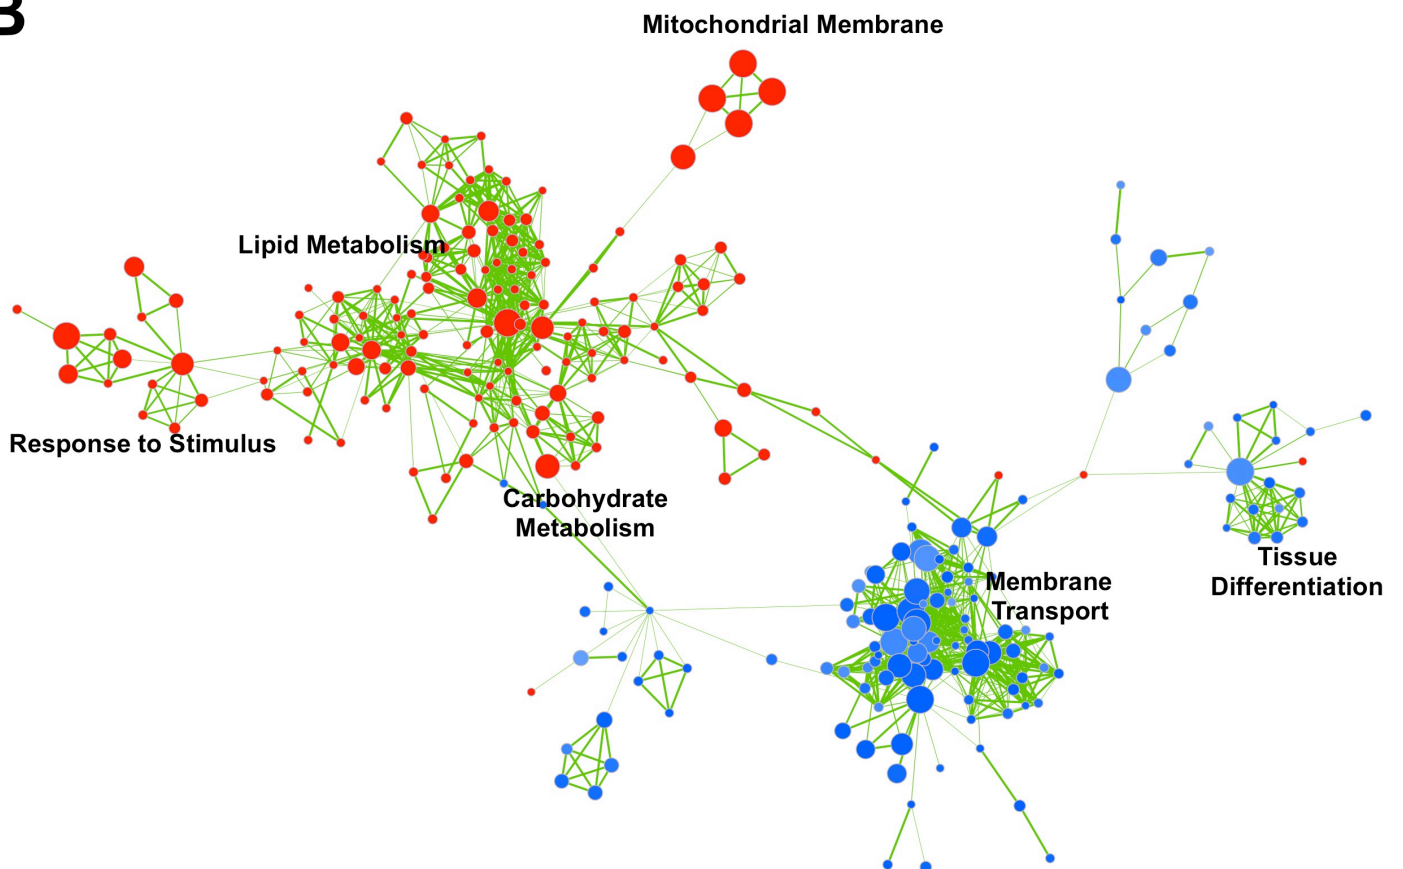

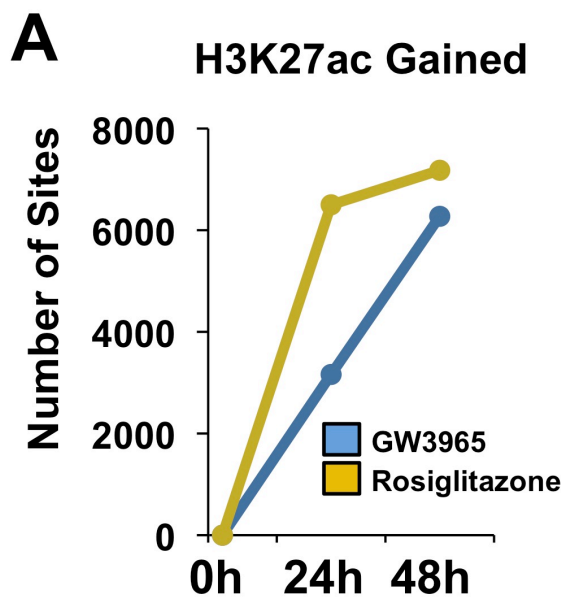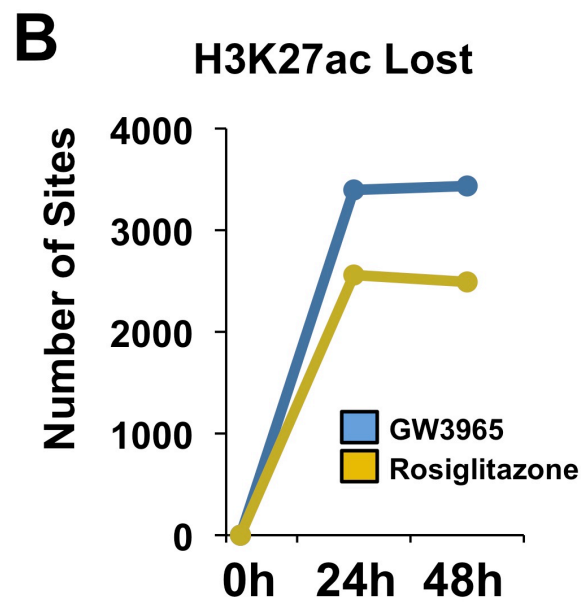

**A** H3K27ac common sites  
(24 hour)

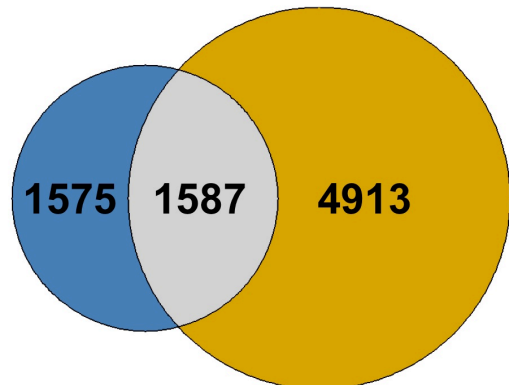

**B** H3K27ac common sites  
(48 hour)

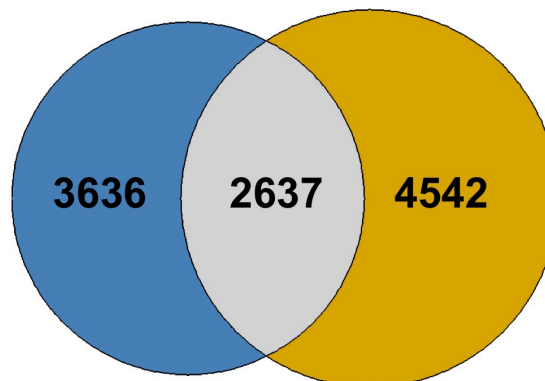

**C**

| Database              | Pathway Name                                                       | Significance<br>-log <sub>10</sub> (Binomial p value) |
|-----------------------|--------------------------------------------------------------------|-------------------------------------------------------|
| GO Biological Process | Regulation of homotypic cell-cell adhesion                         | 6.21                                                  |
| GO Biological Process | Inositol phosphate metabolic process                               | 4.26                                                  |
| GO Biological Process | Toll-like receptor 5 signaling pathway                             | 3.72                                                  |
| GO Biological Process | Toll-like receptor 10 signaling pathway                            | 3.72                                                  |
| GO Biological Process | Toll-like receptor 2 signaling pathway                             | 3.4                                                   |
| GO Biological Process | Positive regulation of cation channel activity                     | 3.26                                                  |
| GO Biological Process | Regulation of potassium ion transmembrane transporter activity     | 3.13                                                  |
| MSigDB Pathway        | Stabilization and expansion of the E-cadherin adherens junction    | 3.54                                                  |
| MSigDB Pathway        | Mechanism of Gene Regulation by Peroxisome Proliferators via PPARα | 3                                                     |

**D**

| Database              | Pathway Name                                                           | Significance<br>-log <sub>10</sub> (Binomial p value) |
|-----------------------|------------------------------------------------------------------------|-------------------------------------------------------|
| GO Biological Process | Response to osmotic stress                                             | 10.15                                                 |
| GO Biological Process | Regulation of mesenchymal cell proliferation                           | 7.47                                                  |
| GO Biological Process | Cellular hormone metabolic process                                     | 6.53                                                  |
| GO Biological Process | Retinoid metabolic process                                             | 6.1                                                   |
| GO Biological Process | Glycoside metabolic process                                            | 5.44                                                  |
| GO Biological Process | Cellular monovalent inorganic cation homeostasis                       | 4.84                                                  |
| GO Biological Process | Regulation of carbohydrate biosynthetic process                        | 4.69                                                  |
| GO Biological Process | Regulation of intracellular pH                                         | 4.61                                                  |
| GO Biological Process | Inactivation of MAPK activity                                          | 3.93                                                  |
| GO Biological Process | Detection of calcium ion                                               | 3.06                                                  |
| MSigDB Pathway        | ErbB1 downstream signaling                                             | 10.73                                                 |
| MSigDB Pathway        | IL17 signaling pathway                                                 | 10.14                                                 |
| MSigDB Pathway        | Genes involved in PPARα activates gene expression                      | 7.68                                                  |
| MSigDB Pathway        | PDGFR-beta signaling pathway                                           | 7.38                                                  |
| MSigDB Pathway        | Calcium signaling in the CD4+ TCR pathway                              | 7.26                                                  |
| MSigDB Pathway        | IL6-mediated signaling events                                          | 6.59                                                  |
| MSigDB Pathway        | Genes involved in apoptotic cleavage of cell adhesion proteins         | 6.47                                                  |
| MSigDB Pathway        | Stabilization and expansion of the E-cadherin adherens junction        | 5.75                                                  |
| MSigDB Pathway        | TGF-beta receptor signaling                                            | 5.63                                                  |
| MSigDB Pathway        | Genes involved in MAPK targets/ Nuclear events mediated by MAP kinases | 4.74                                                  |
| Panther Pathway       | Apoptosis signaling pathway                                            | 7.73                                                  |
| Panther Pathway       | Oxidative stress response                                              | 5.14                                                  |



**A****GW3965**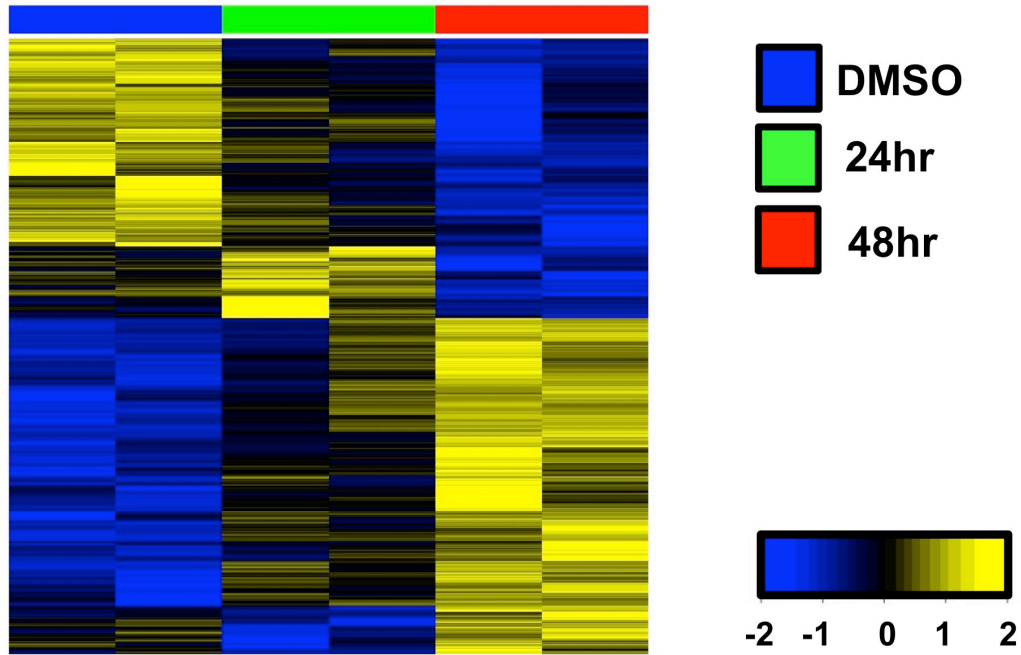**B****Rosiglitazone**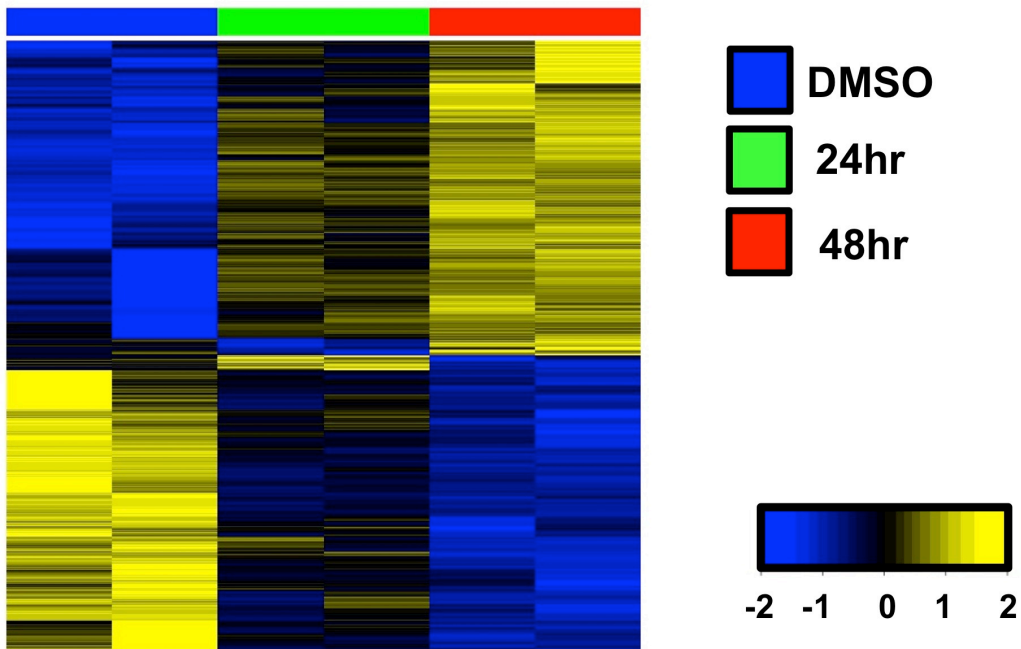

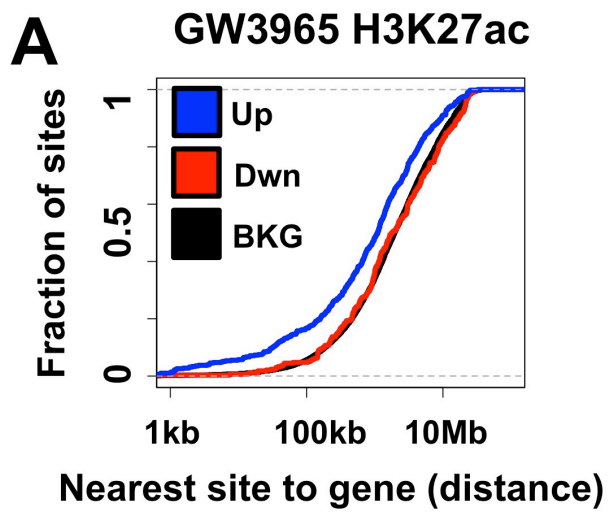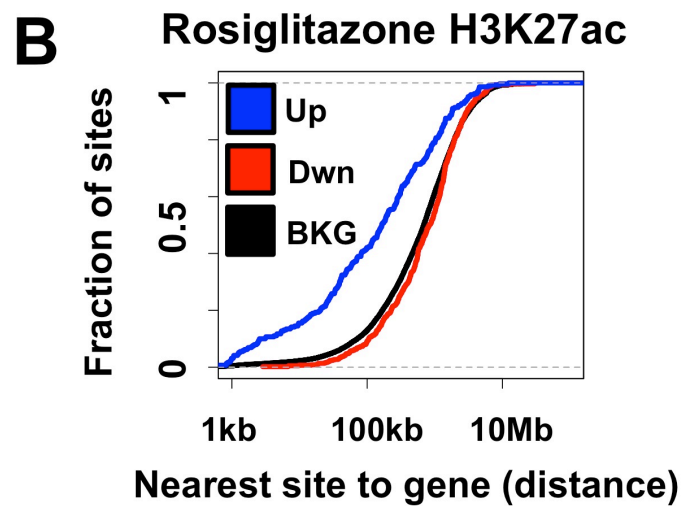

### GW3965 H3K27ac

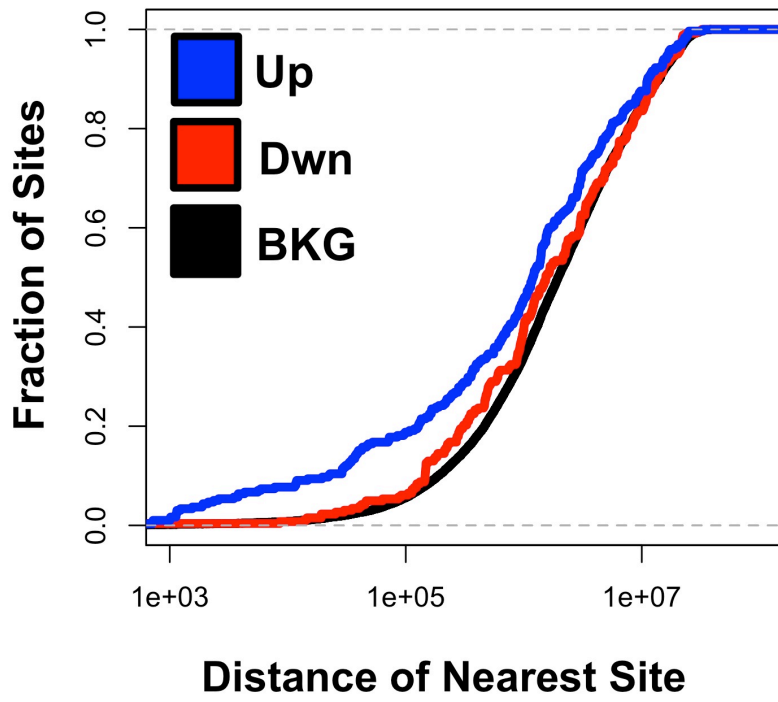

**A****H3K27ac GW3965 Increasing**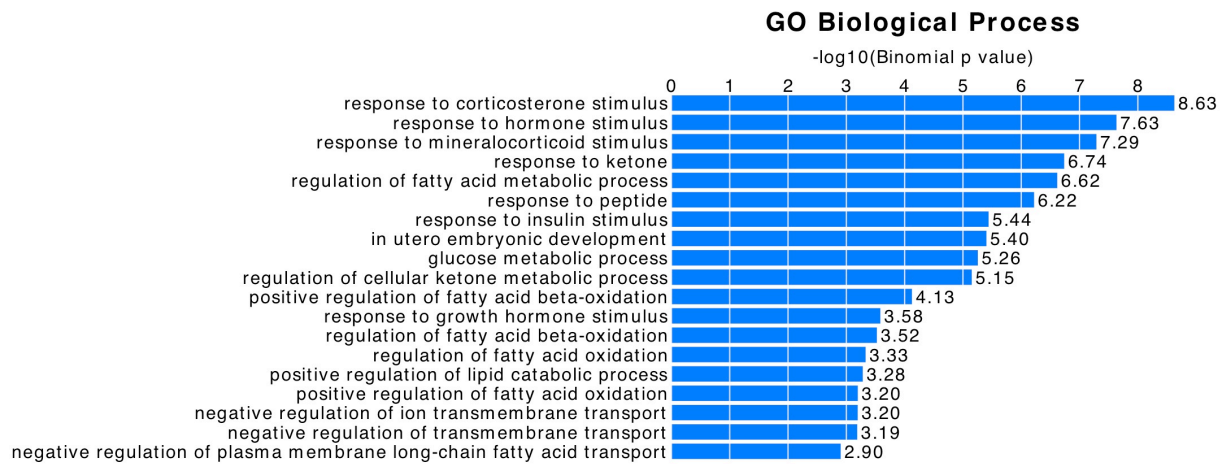**B****H3K27ac GW3965 Increasing**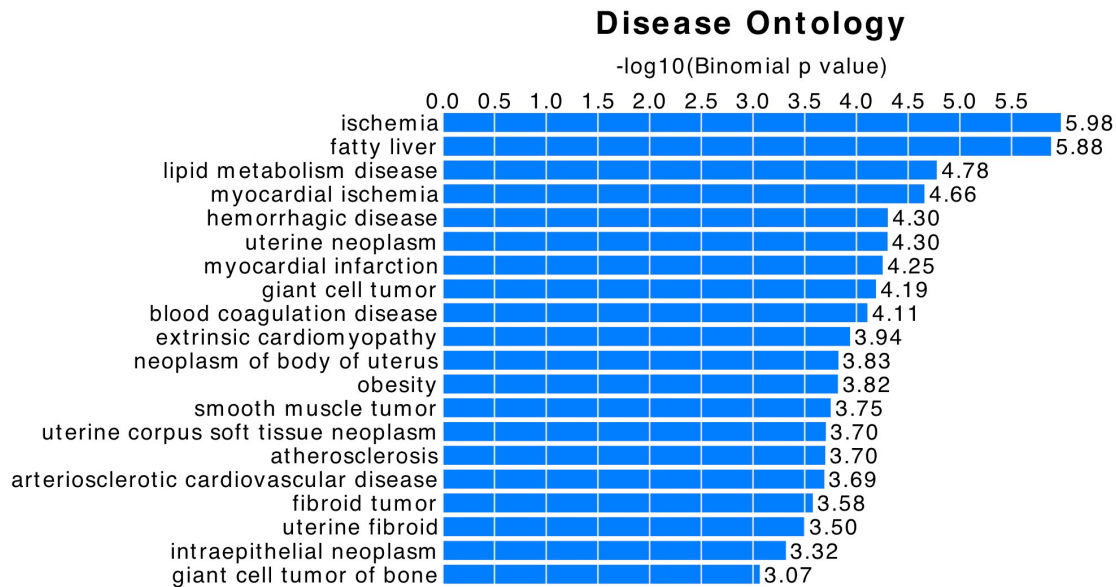

**A****H3K27ac Rosiglitazone Increasing**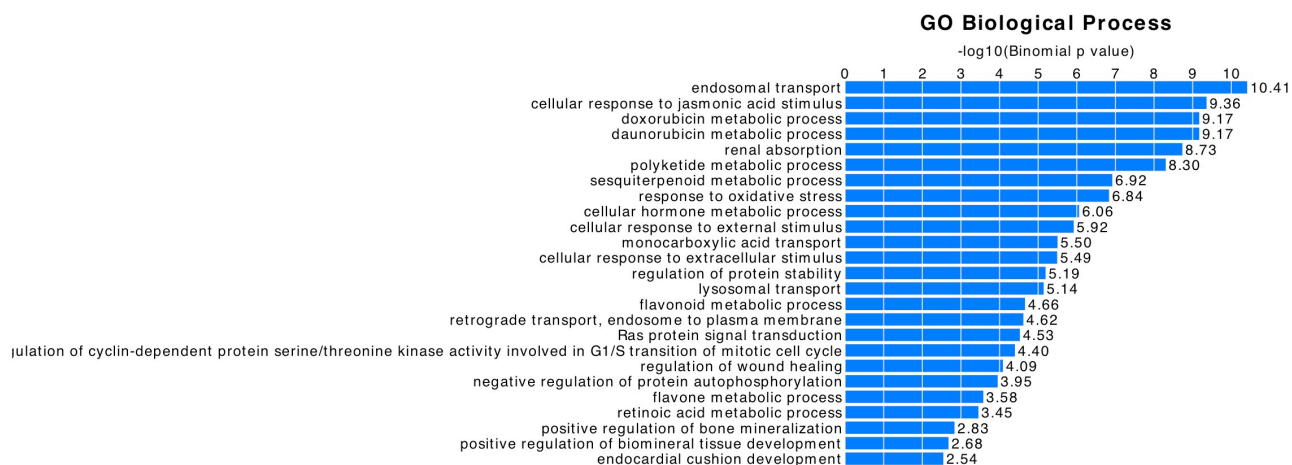**B****H3K27ac Rosiglitazone Increasing**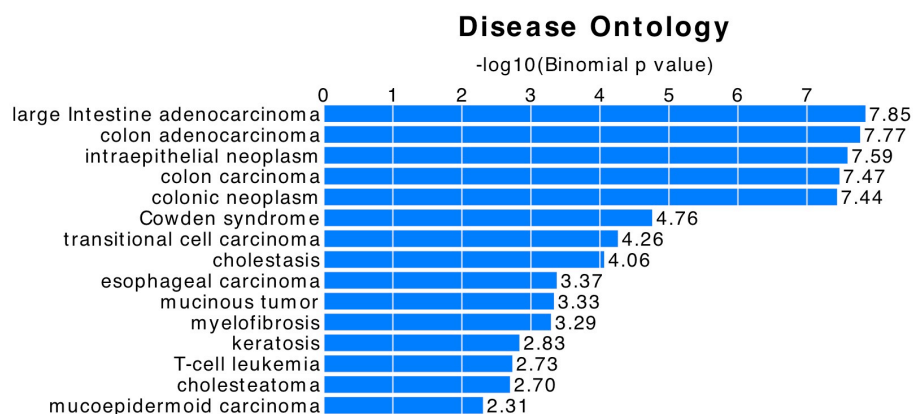

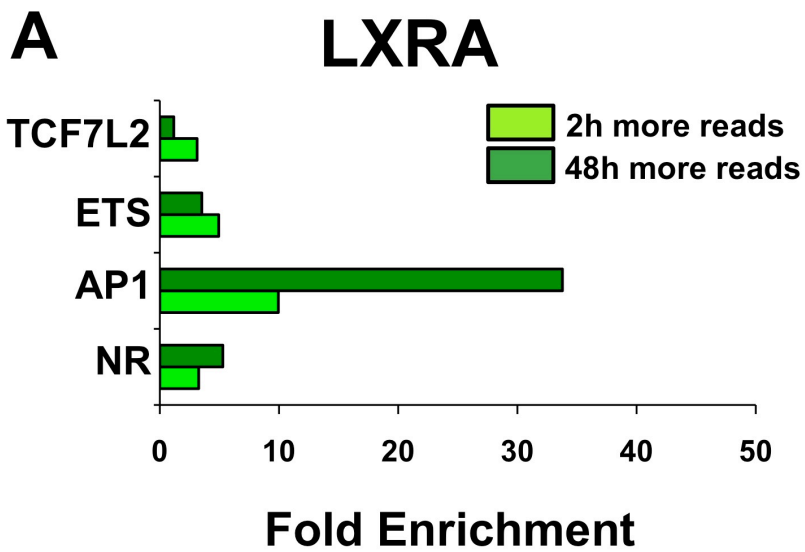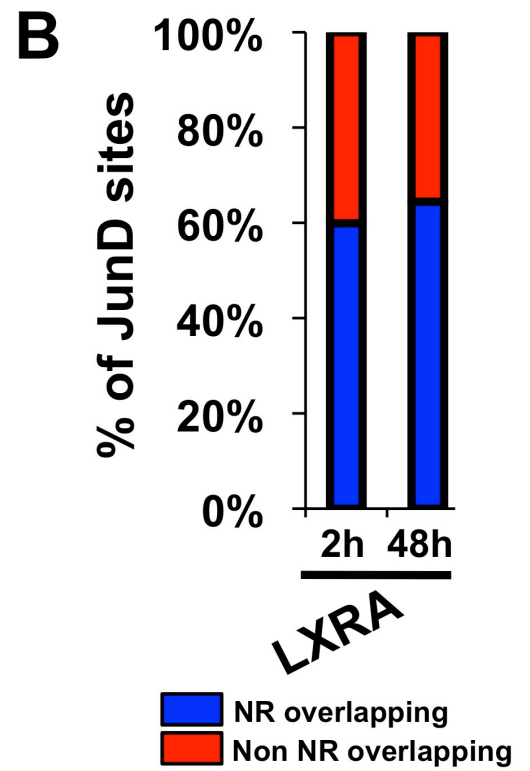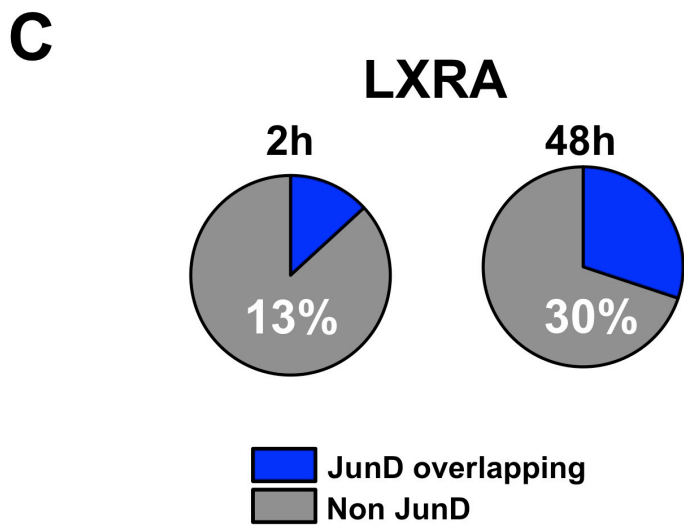

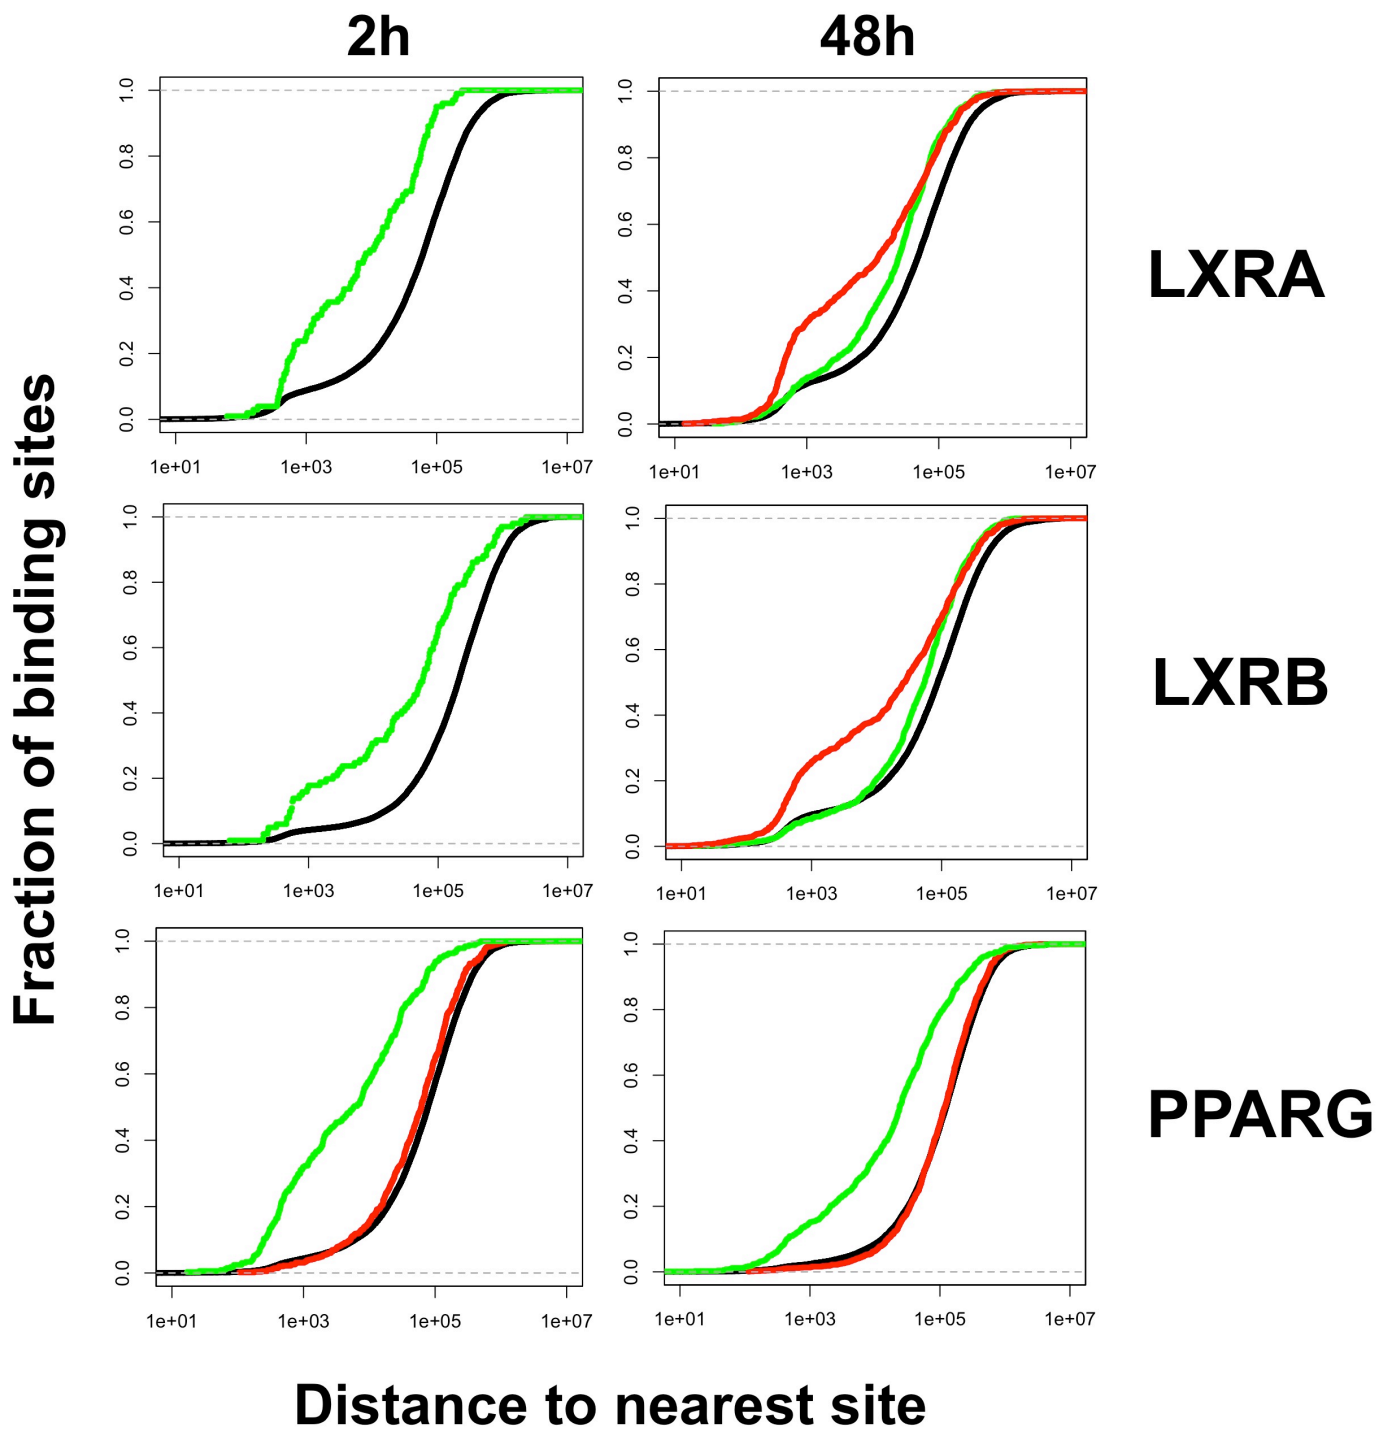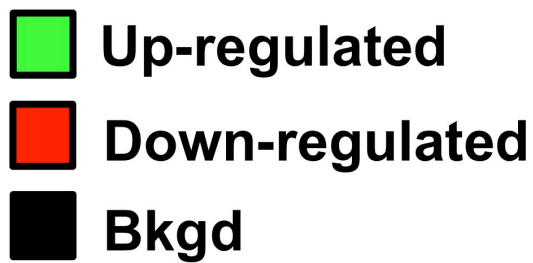

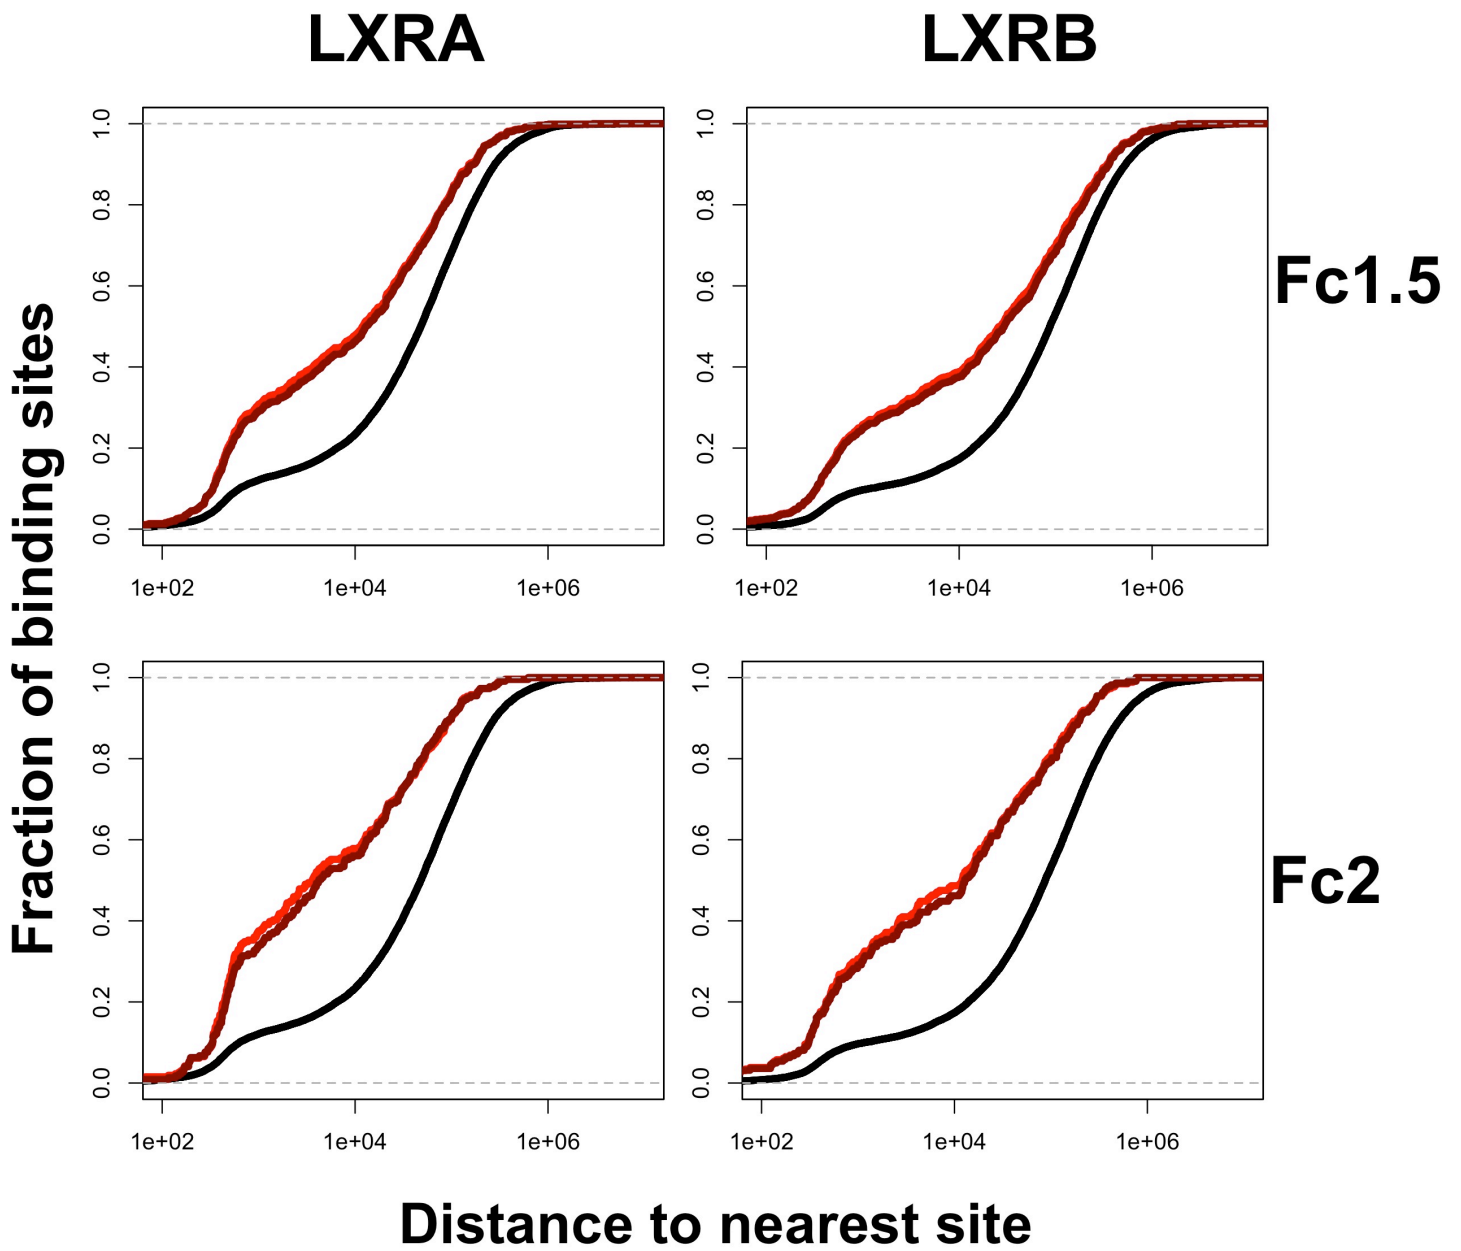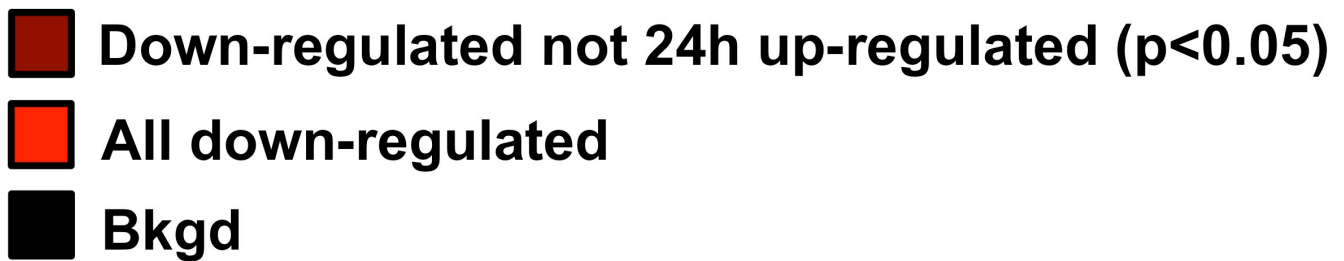



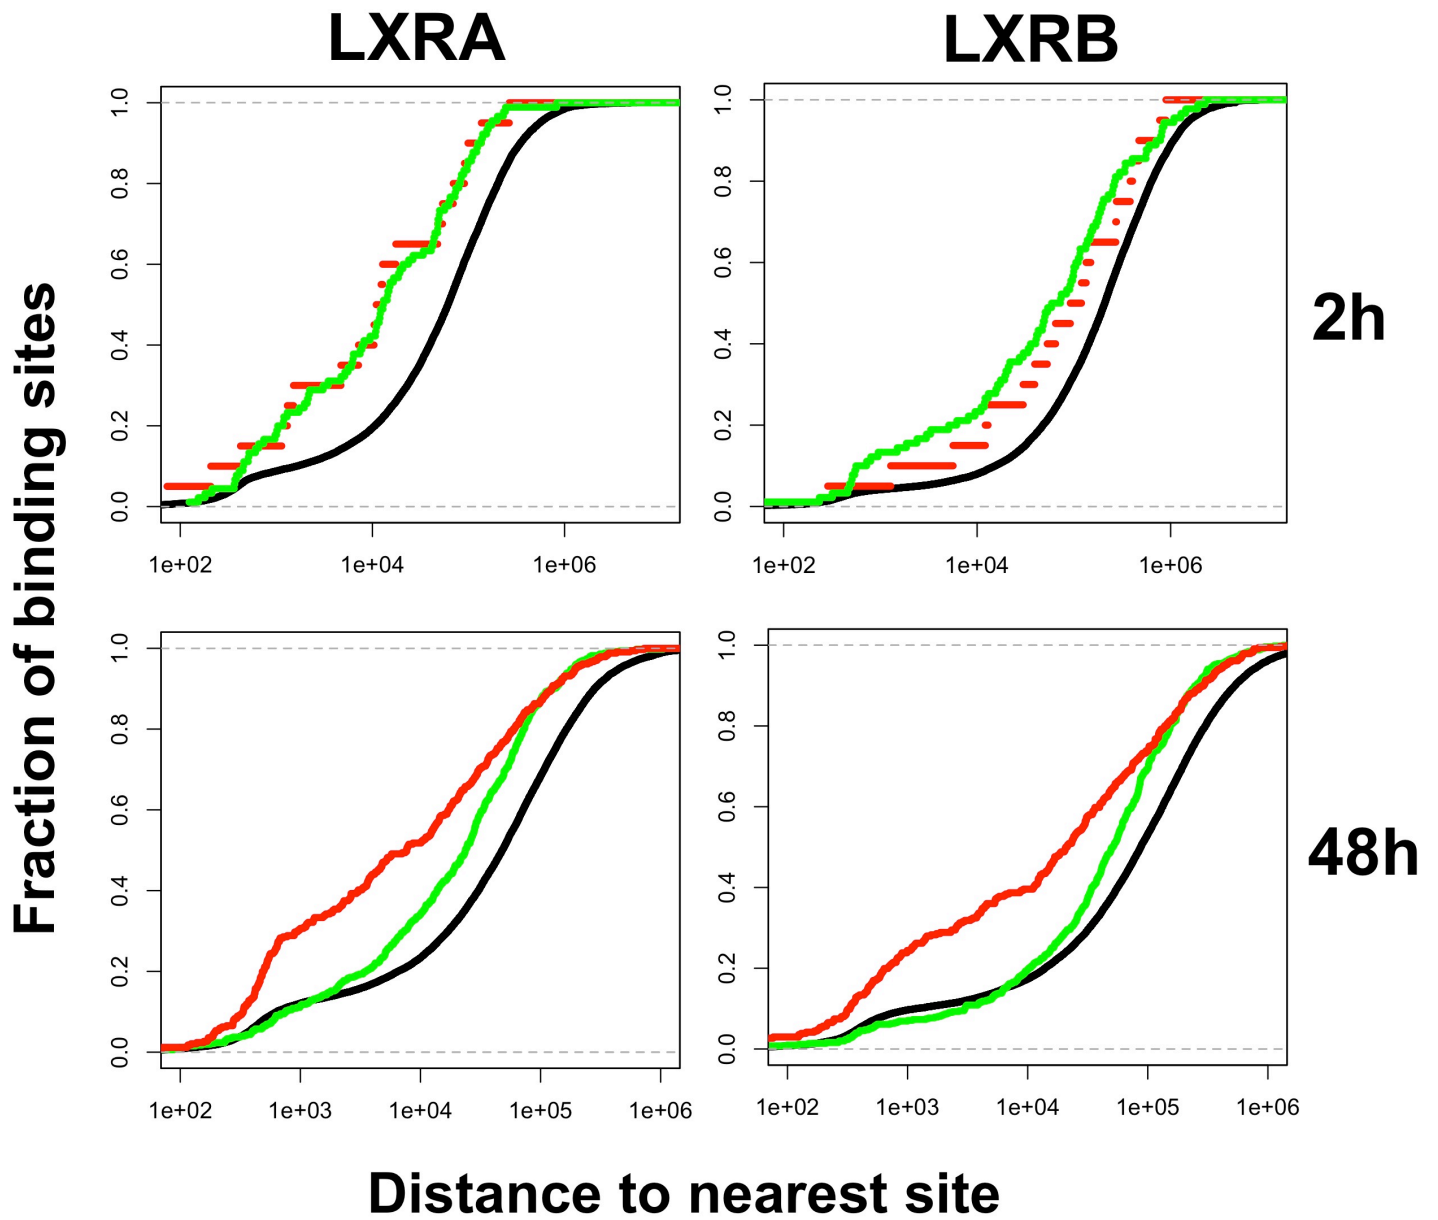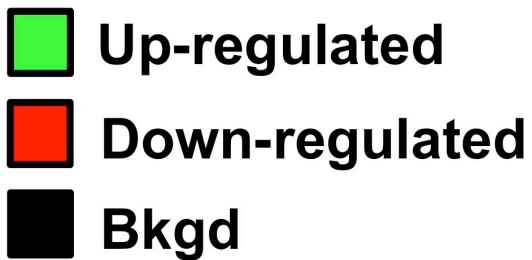

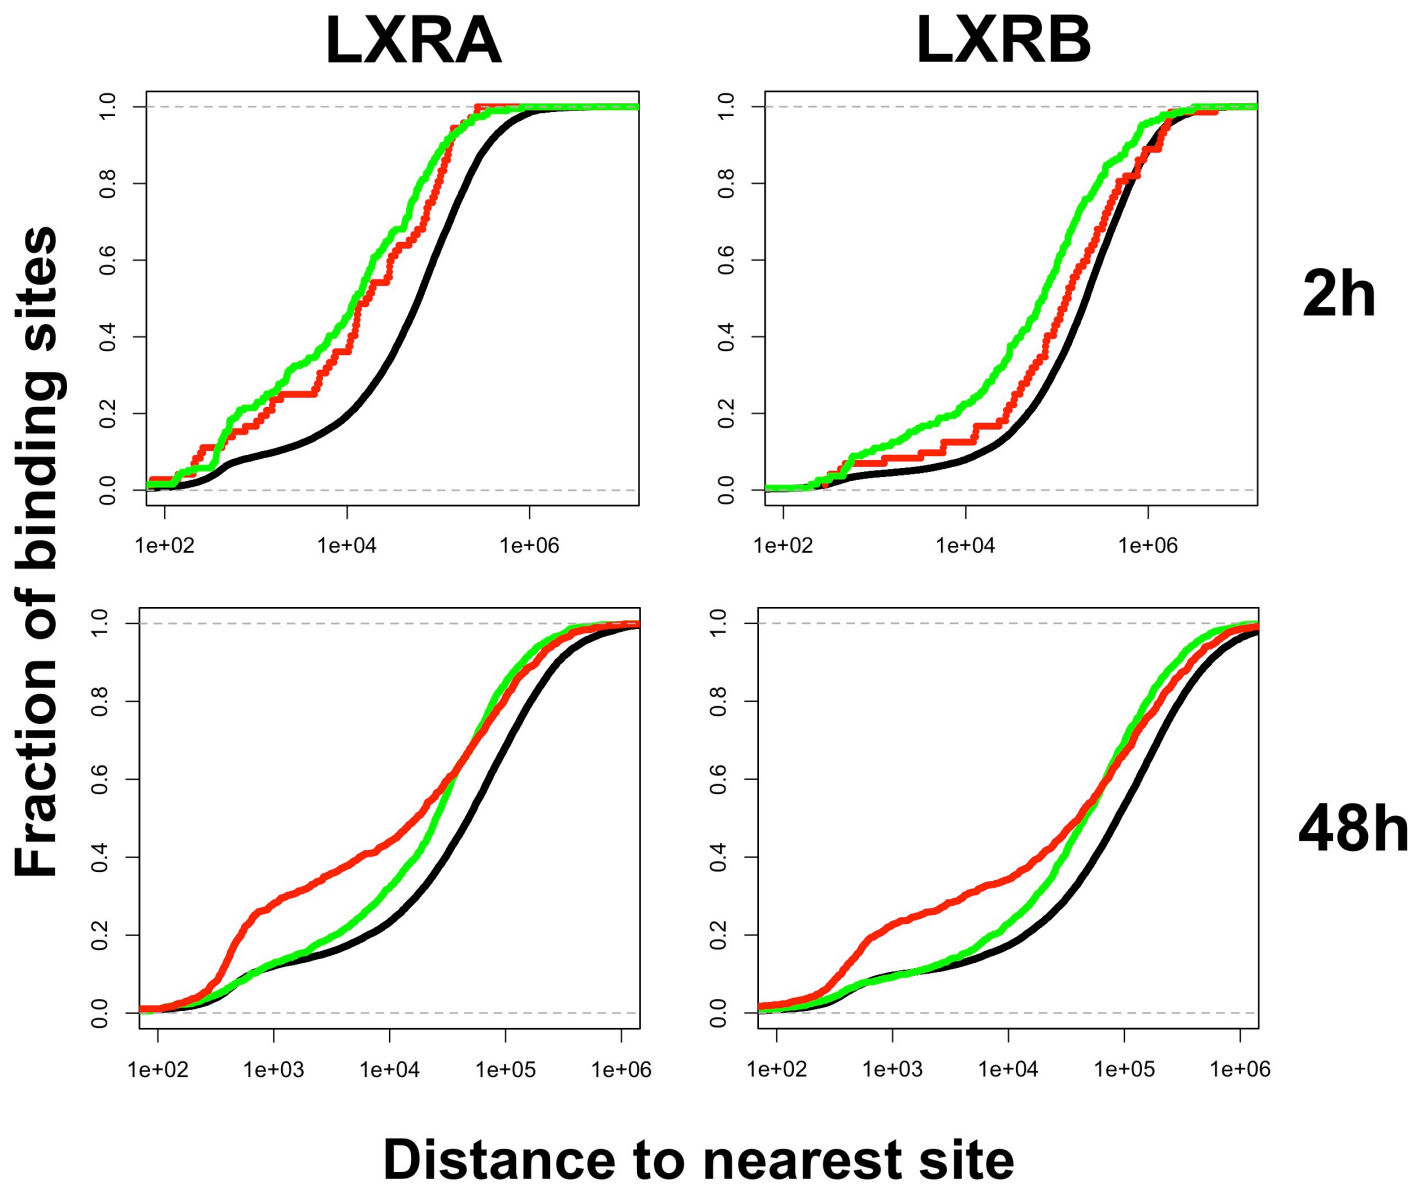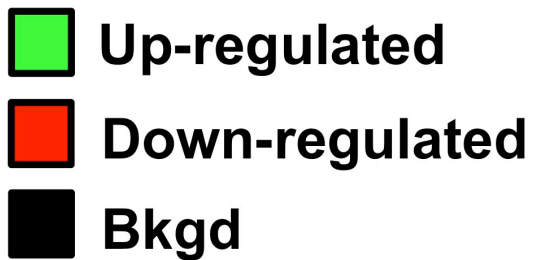

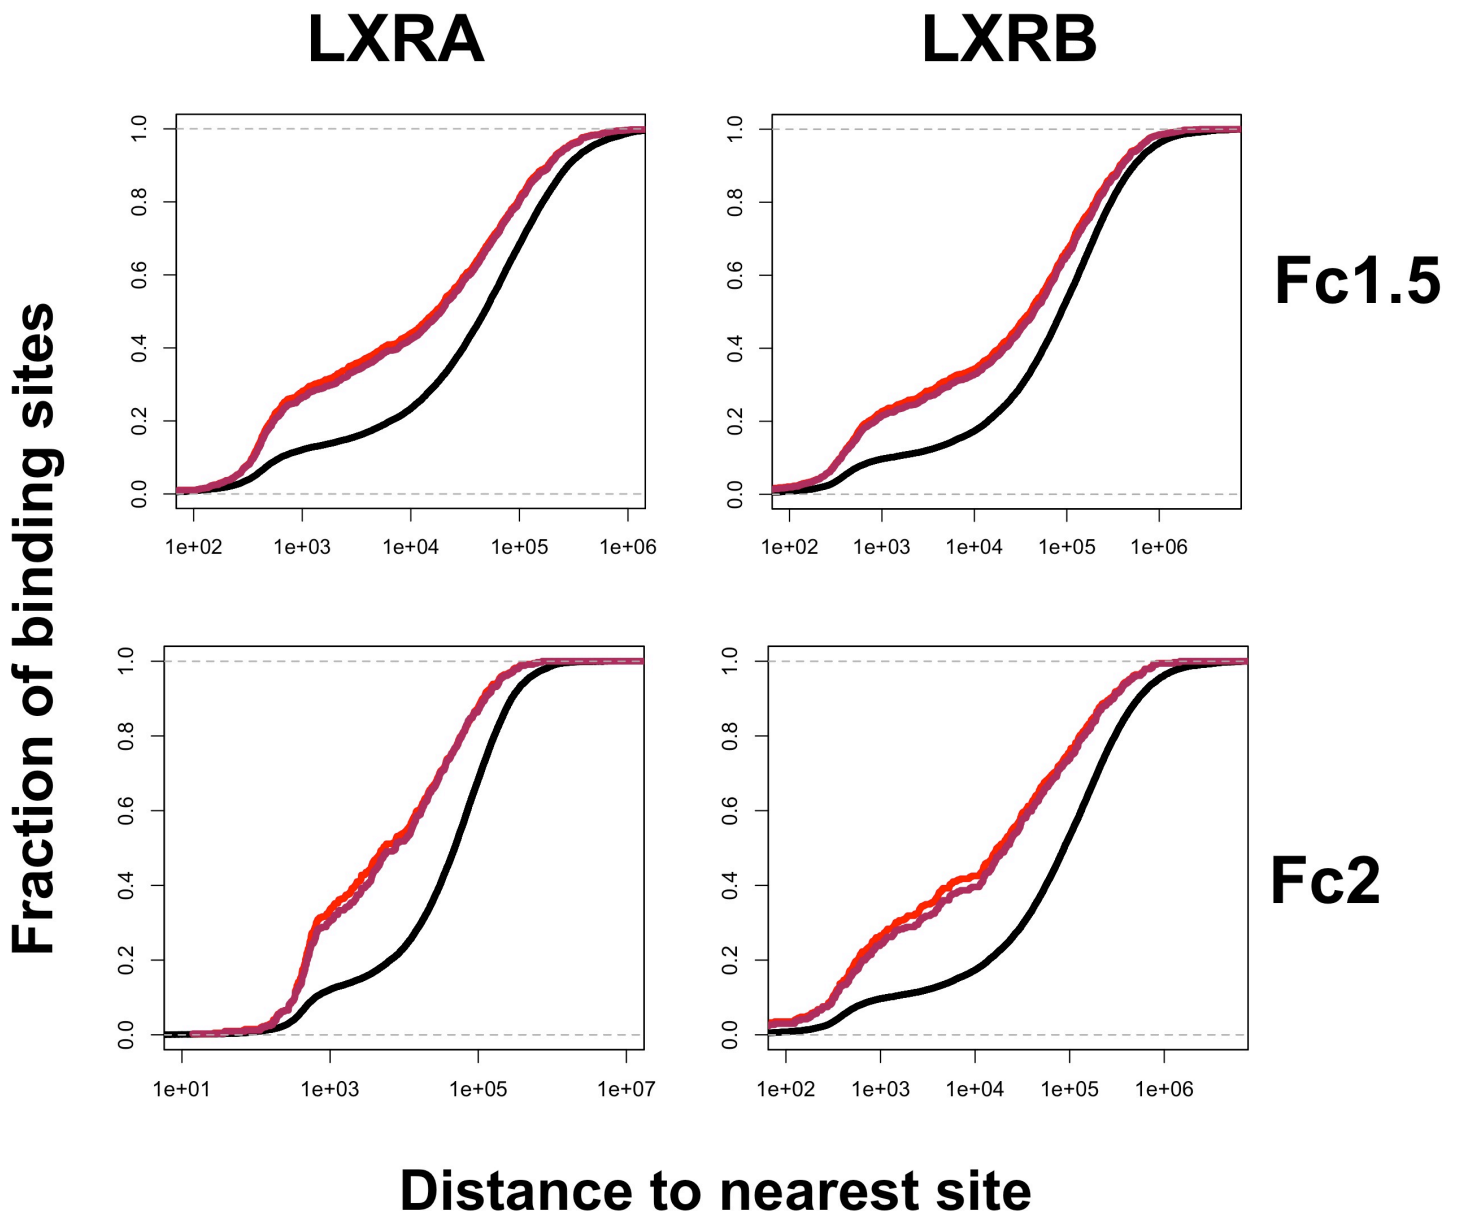

- Down-regulated not 24h up-regulated ( $p < 0.05$ )
- All down-regulated
- Bkgd

**Fraction of binding sites**

**LXRA**

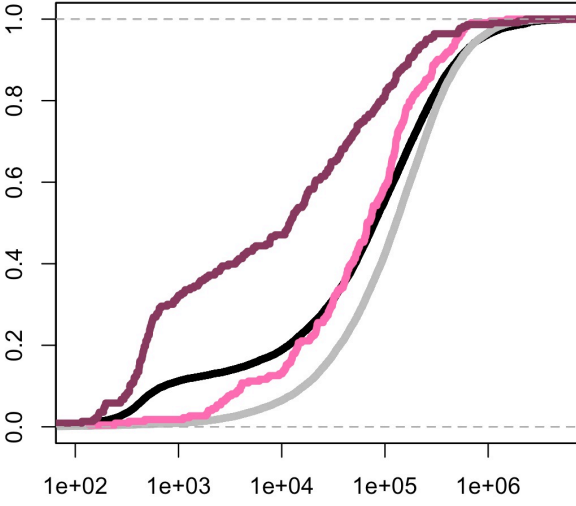

**LXRB**

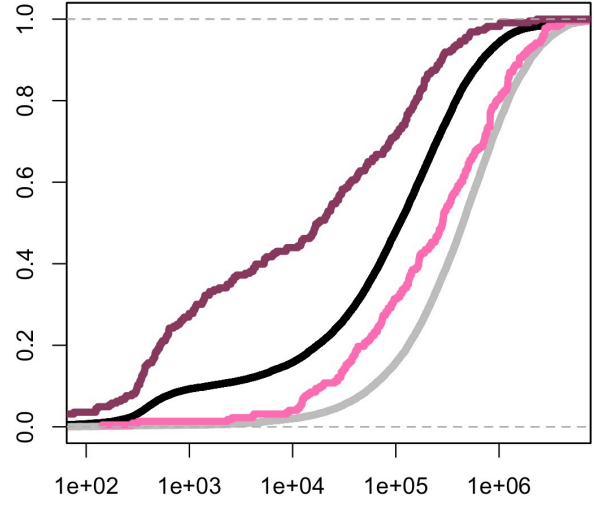

**Distance to nearest site**

-  **LXR+RNAP2**
-  **LXR-RNAP2**
-  **Bkgd (LXR+RNAP2)**
-  **Bkgd (LXR-RNAP2)**

**Fraction of binding sites**

**LXRA**

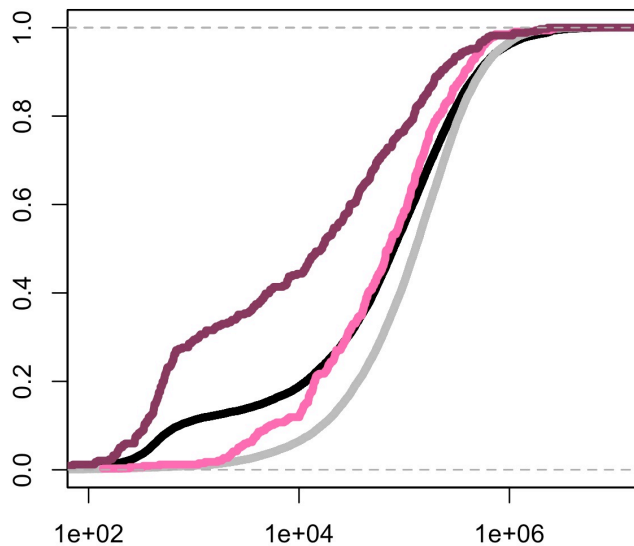

**LXRB**

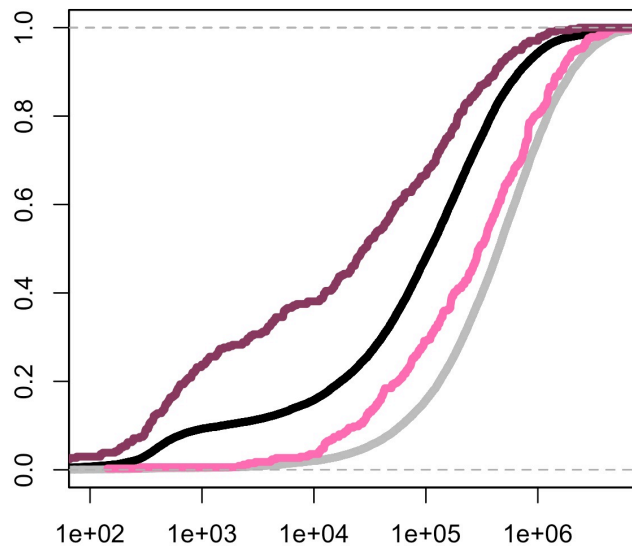

**Distance to nearest site**

-  **LXR+RNAP2**
-  **LXR-RNAP2**
-  **Bkgd (LXR+RNAP2)**
-  **Bkgd (LXR-RNAP2)**

# PPARG

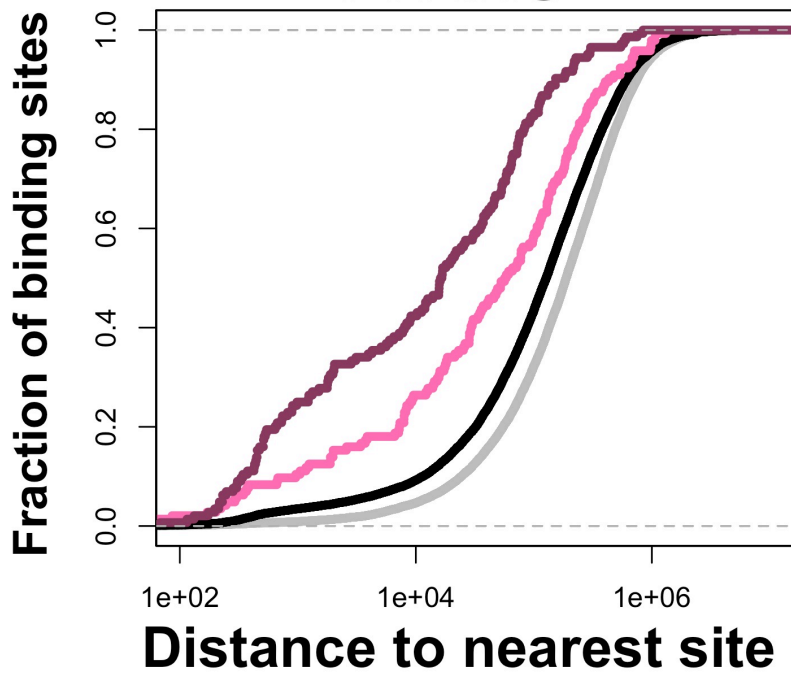

- PPARG+RNAP2 Bkgd
- PPARG-RNAP2 Bkgd
- PPARG+RNAP2 (24h up)
- PPARG-RNAP2 (24h up)

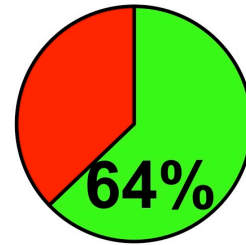

**A**  
Fraction of binding sites

**LXRA**

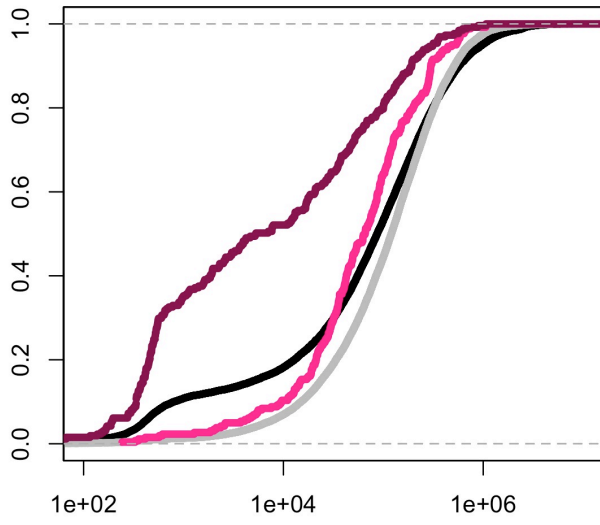

**LXRB**

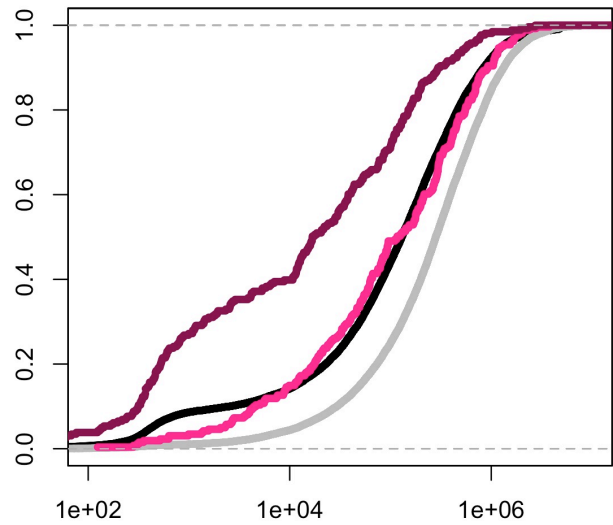

**Distance to nearest site**

**B**  
Fraction of binding sites

**PPARG**

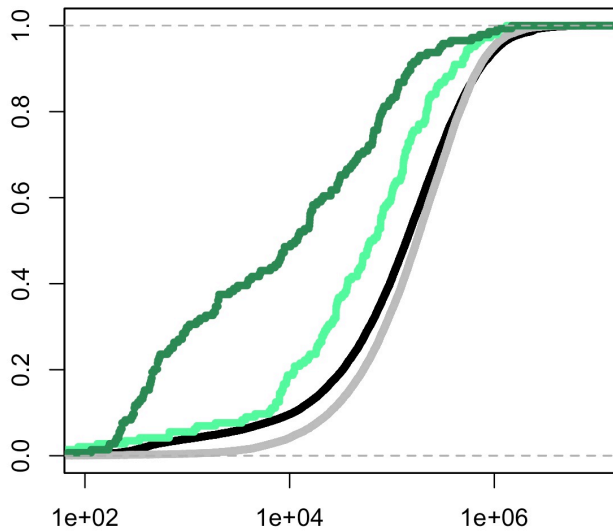

- +H3K27ac Bkgd
- -H3K27ac Bkgd
- LXR+H3K27ac (48h down)
- LXR-H3K27ac (48h down)
- PPARG+H3K27ac (24h up)
- PPARG-H3K27ac (24h up)

**Distance to nearest site**

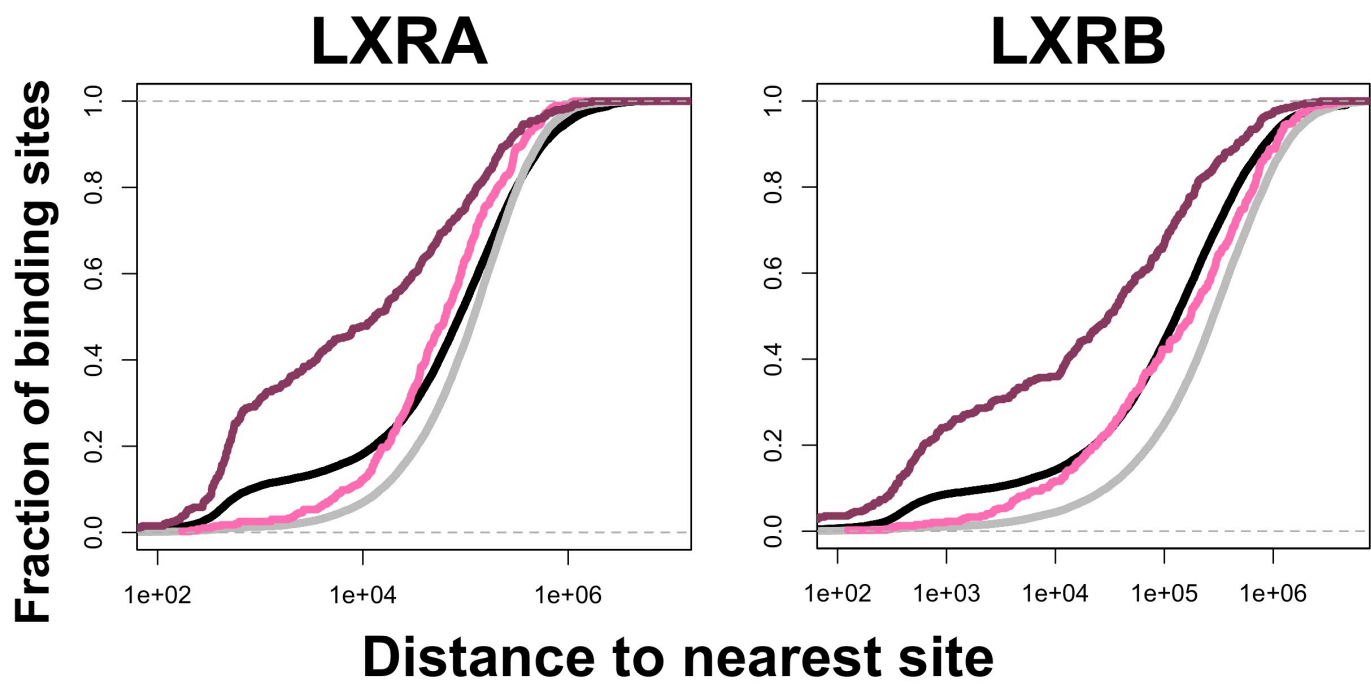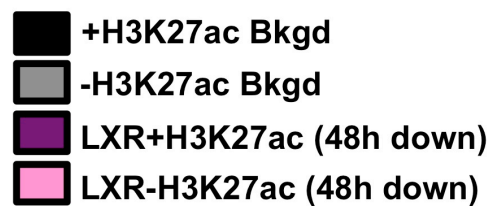



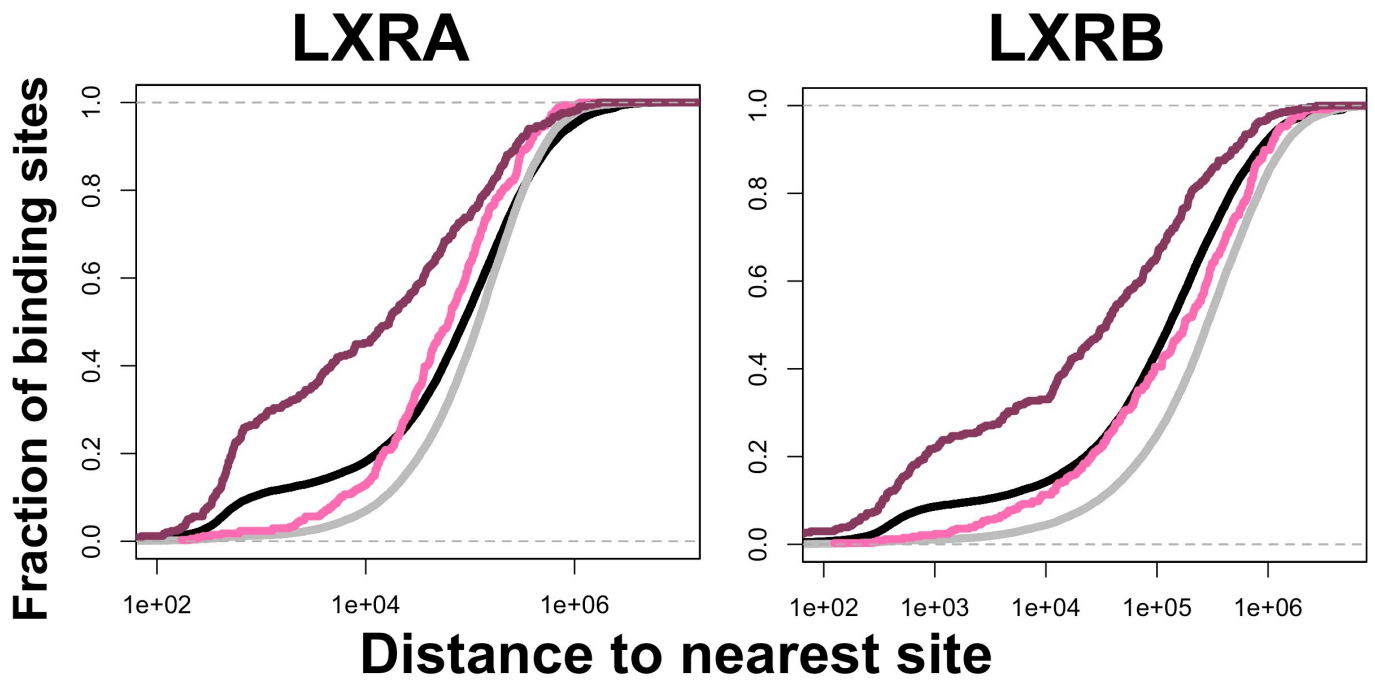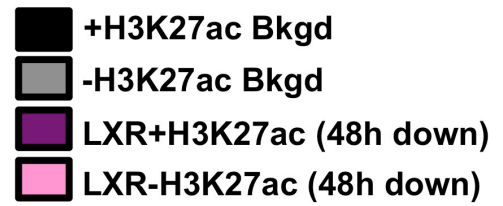

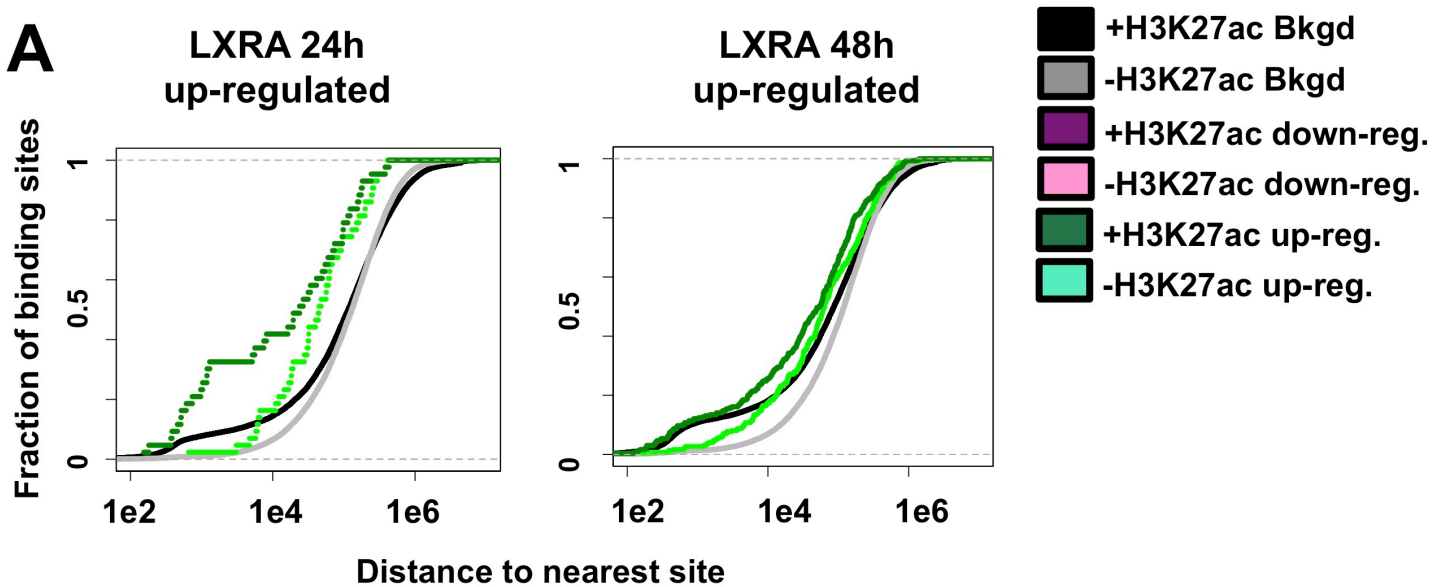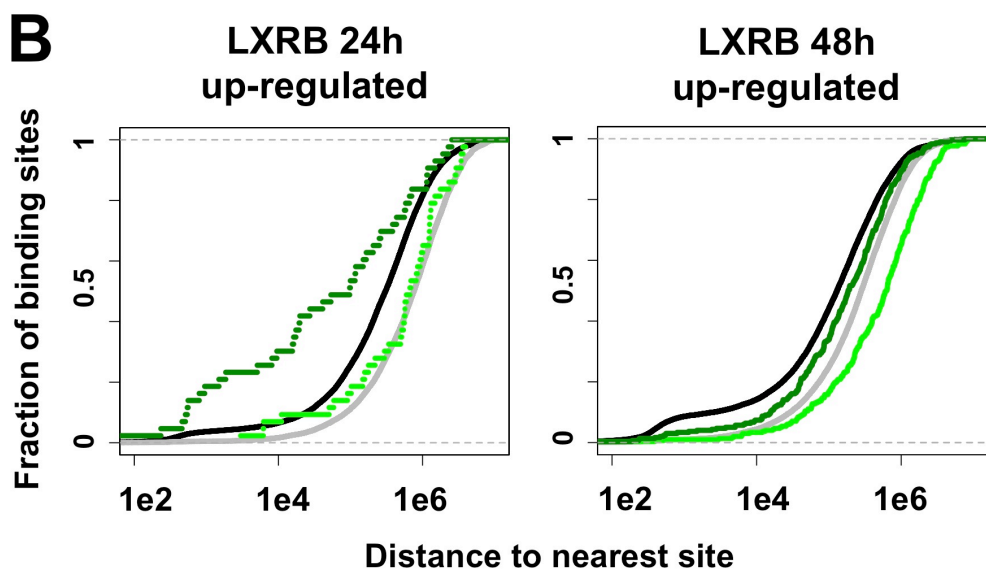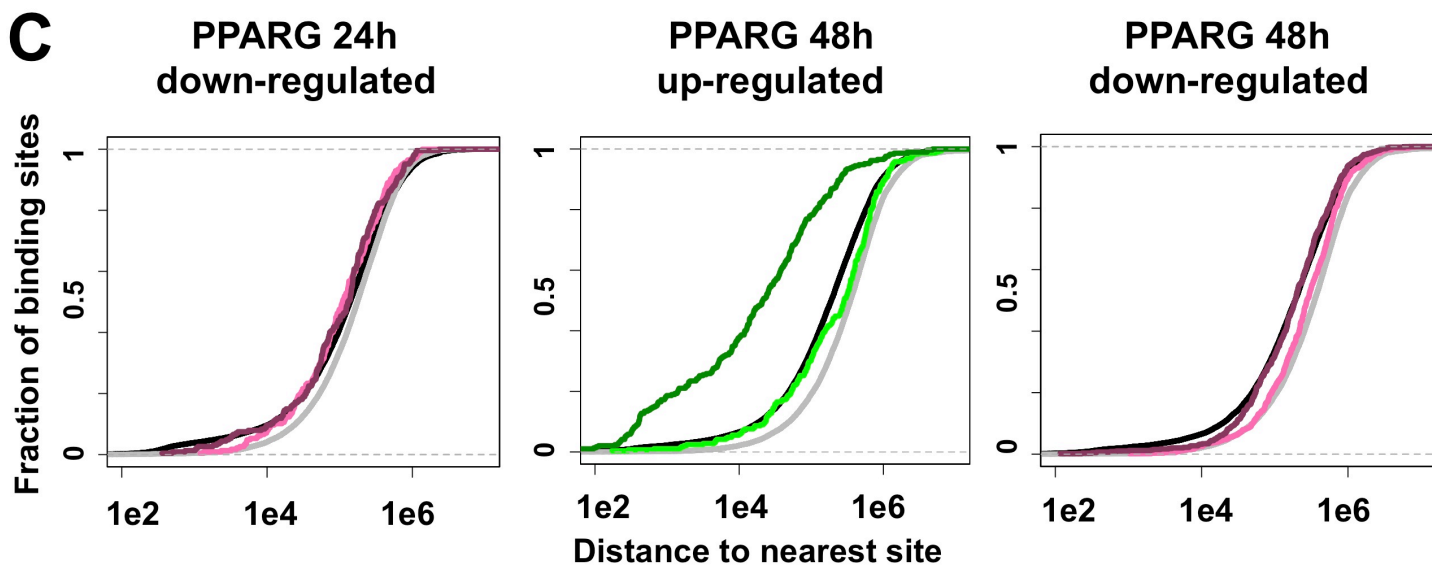

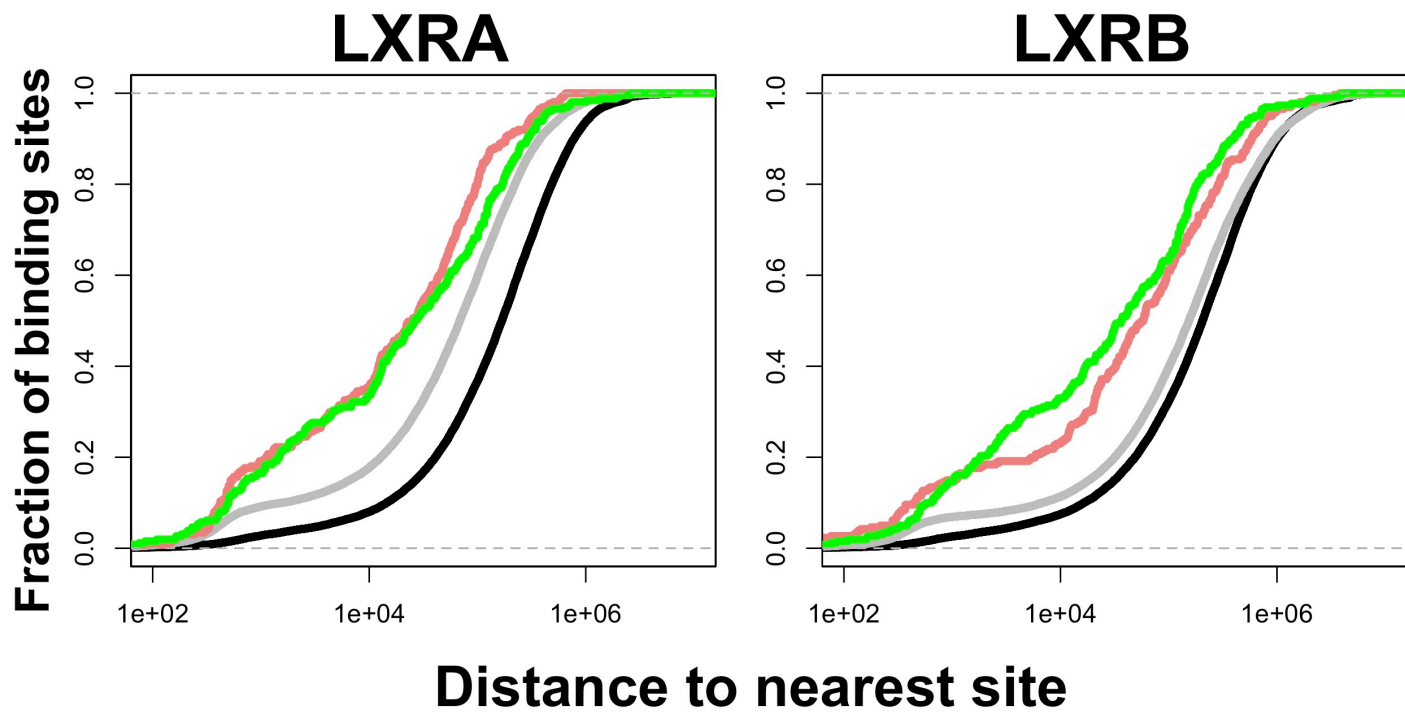

- +JunD Bkgd
- JunD Bkgd
- LXR+JunD
- LXR-JunD

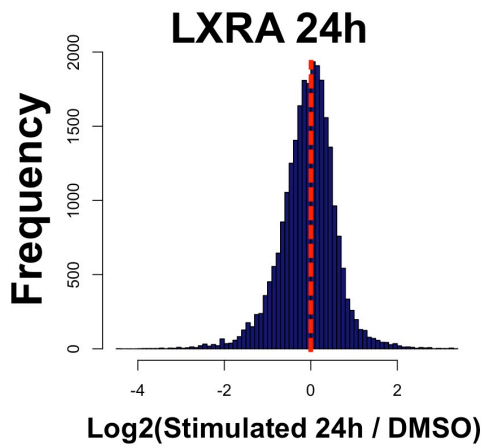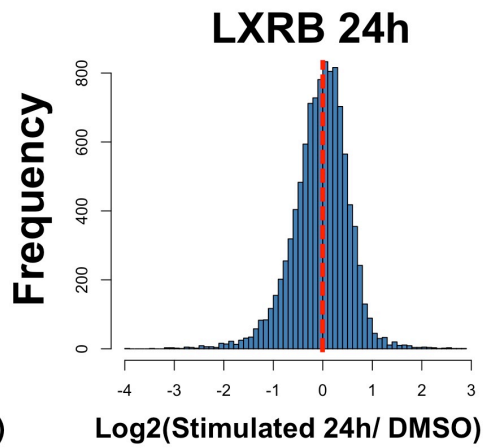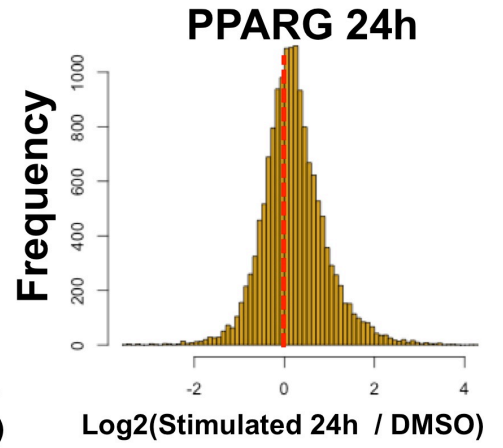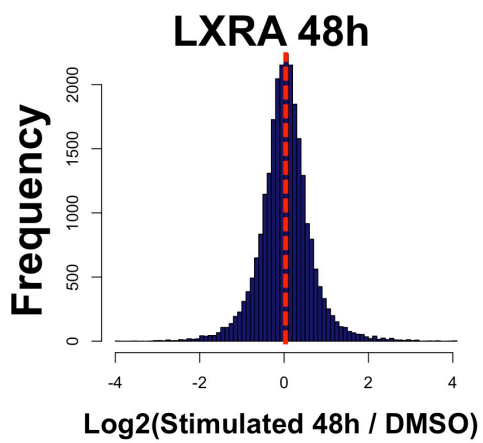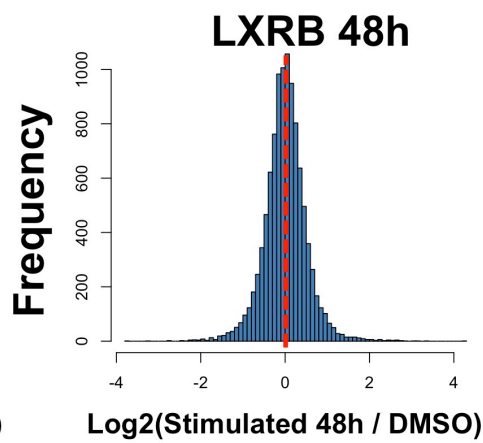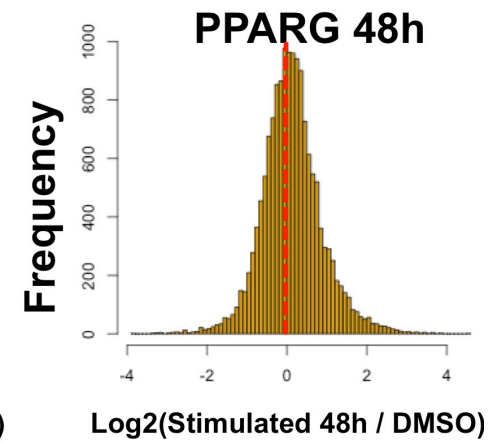

**A**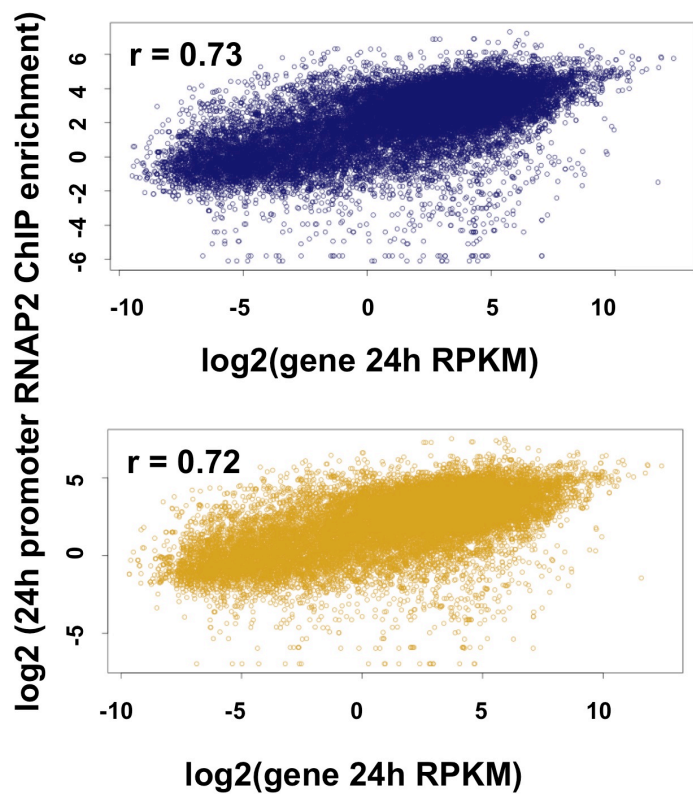**B**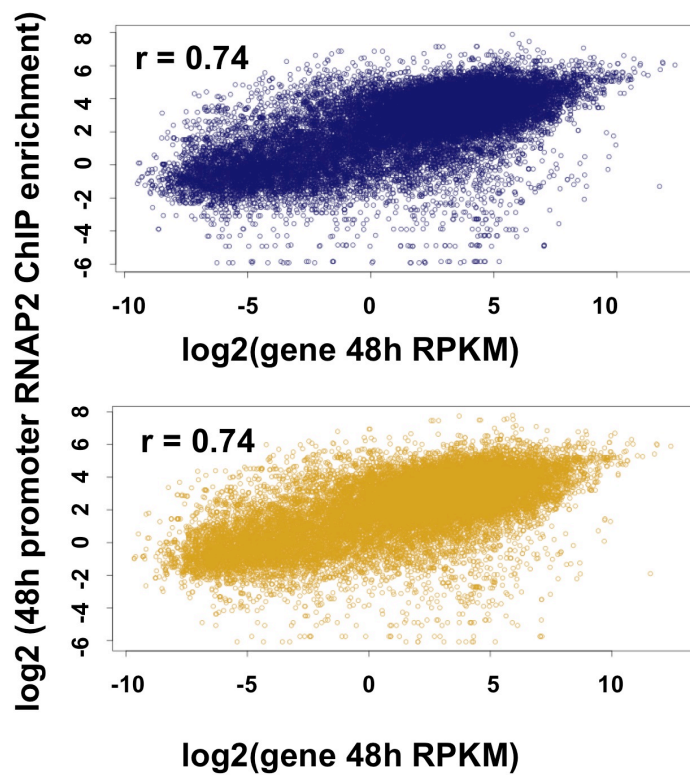

**A****GW3965 (24h)**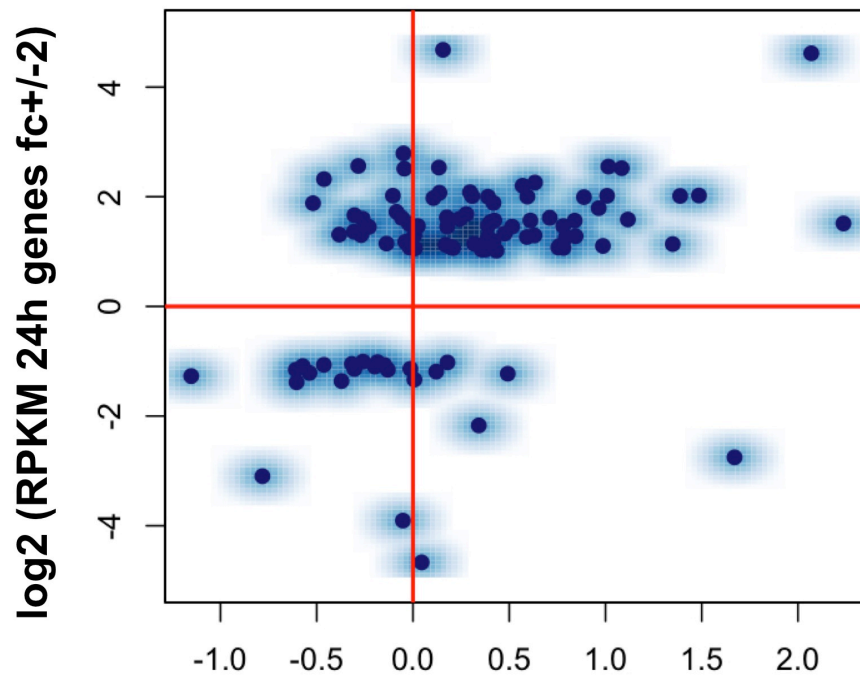 $\log_2$  (RNAP2 promoter CHIP enrichment [24h/0h])**B****Rosiglitazone (24h)**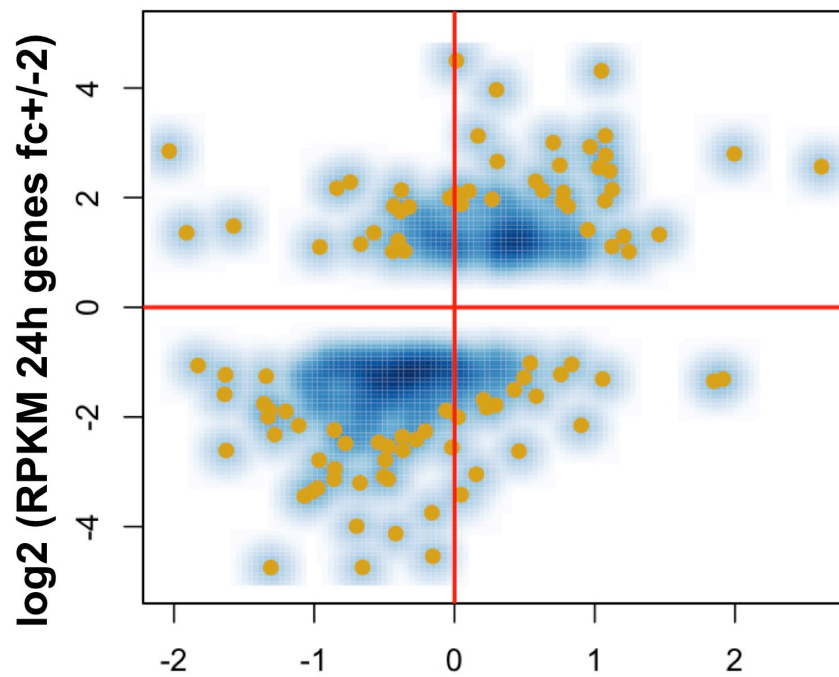 $\log_2$  (RNAP2 promoter CHIP enrichment [24h/0h])

**A****GW3965 (fc1.5)**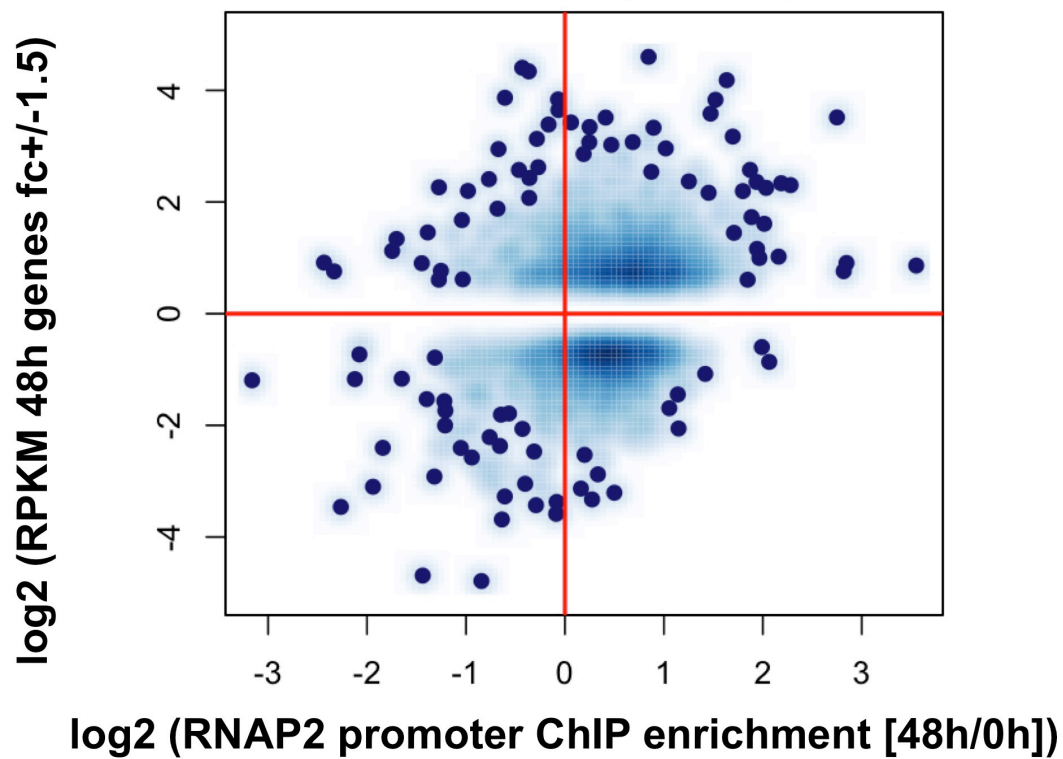**B****GW3965 (fc1.75)**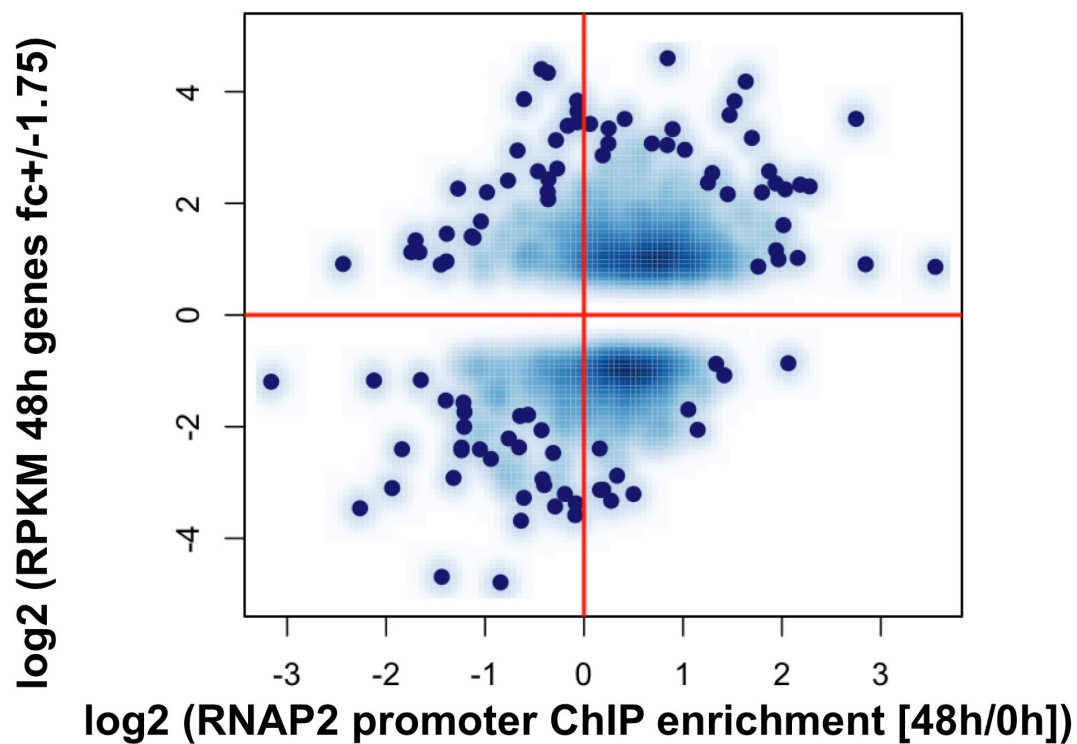



**A****Rosiglitazone (fc1.5)****log<sub>2</sub> (RPKM 48h genes fc+/-1.5)**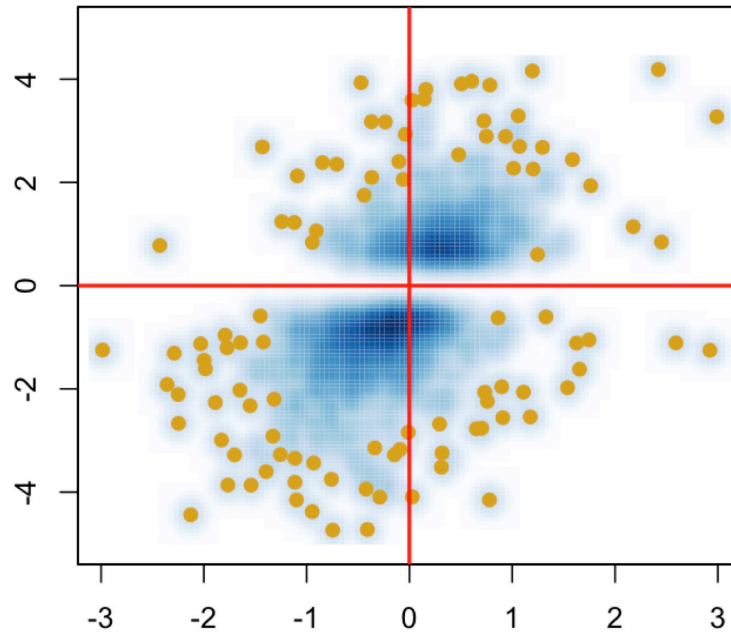**log<sub>2</sub> (RNAP2 promoter CHIP enrichment [48h/0h])****B****Rosiglitazone (fc1.75)****log<sub>2</sub> (RPKM 48h genes fc+/-1.75)**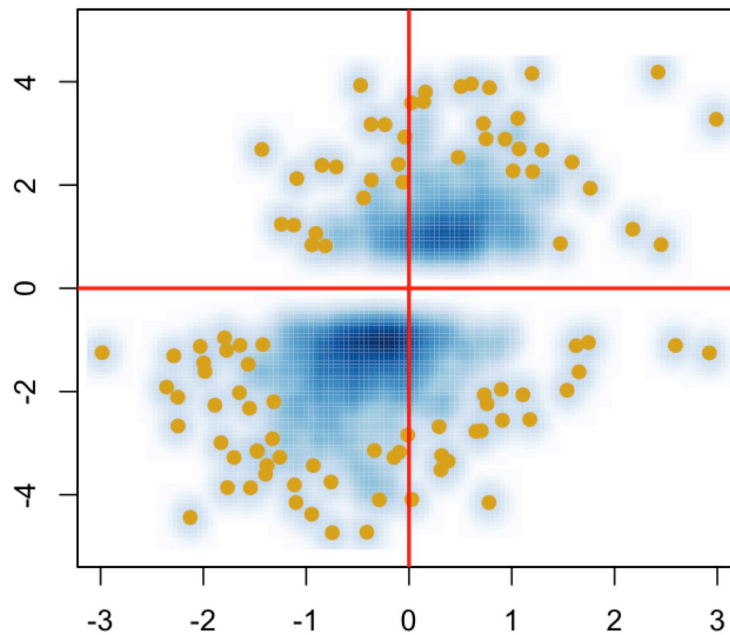**log<sub>2</sub> (RNAP2 promoter CHIP enrichment [48h/0h])**



**A**

$\log_2$  (RPKM GW3965 48h genes  $fc+/-2$ )

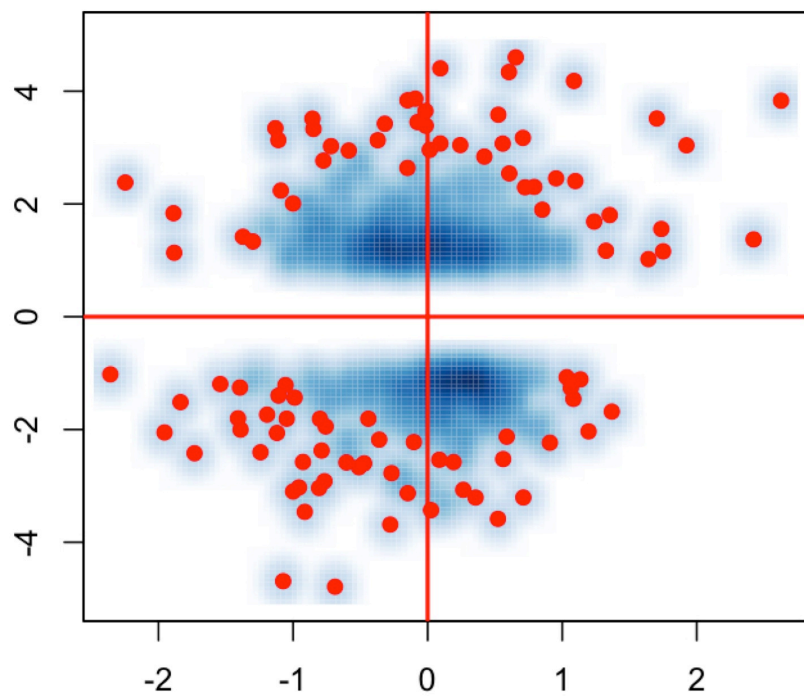

$\log_2$  (RNAP2 ROSI promoter CHIP [48h/0h])

**B**

$\log_2$  (RPKM ROSI 48h genes  $fc+/-2$ )

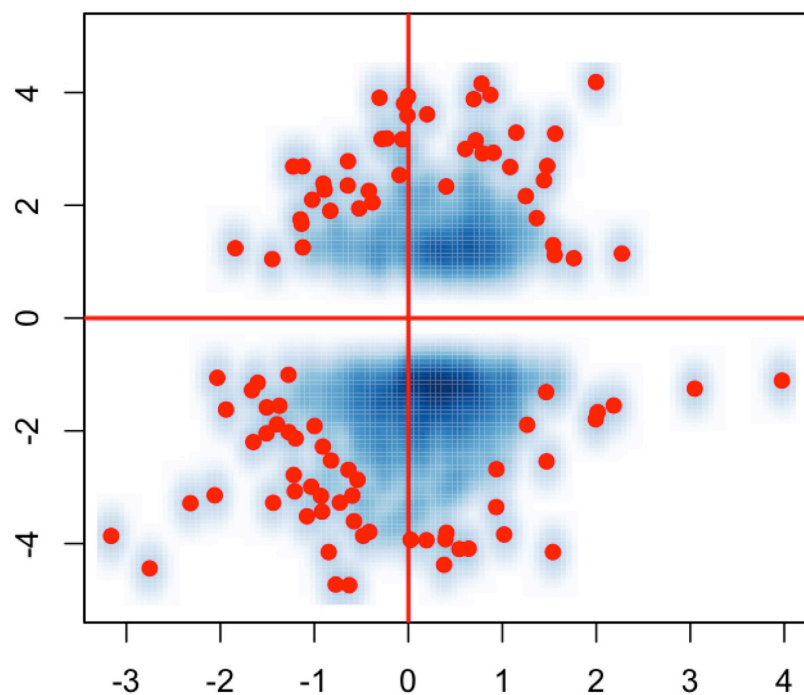

$\log_2$  (RNAP2 GW3965 promoter CHIP [48h/0h])

100kb

chr3: 98,550,000

98,650,000

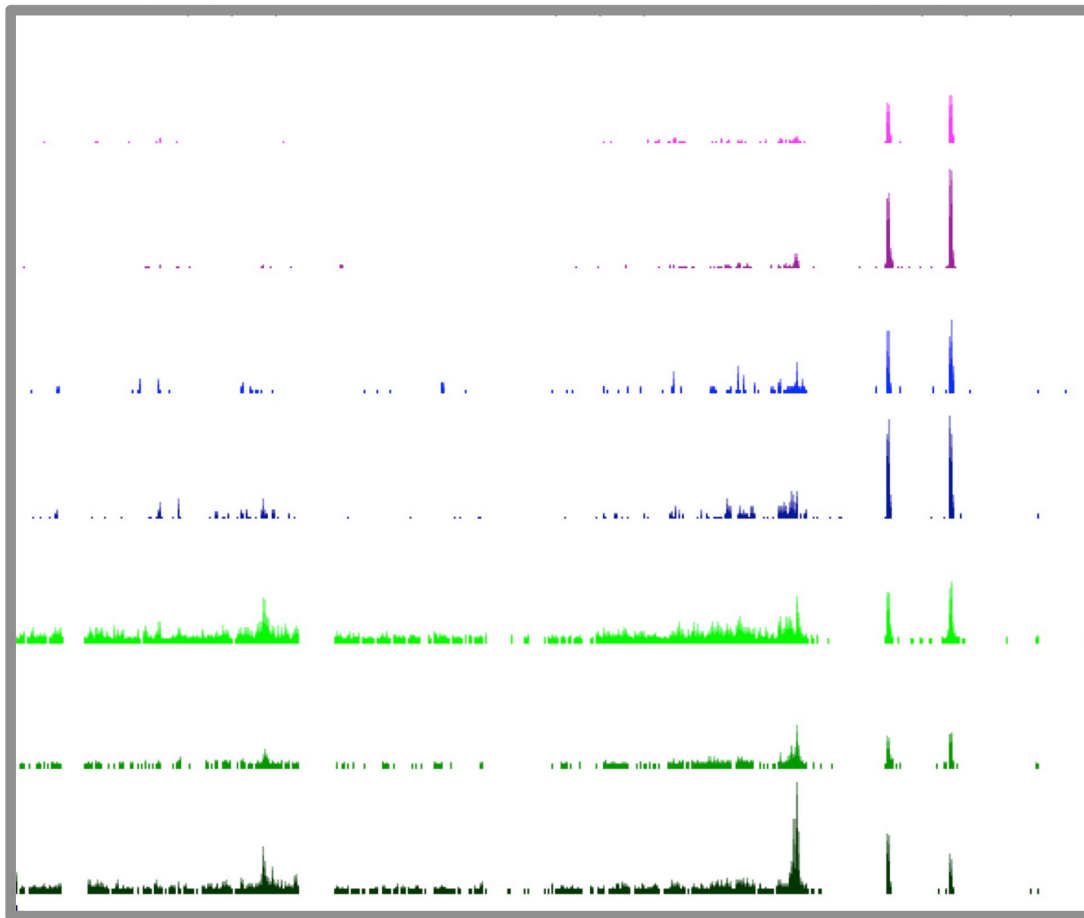

LXRA 2h

LXRA 48h

LXRA 2h

LXRA 48h

RNAP2 ctrl

RNAP2 24h

RNAP2 48h

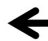

*DCBLD2*

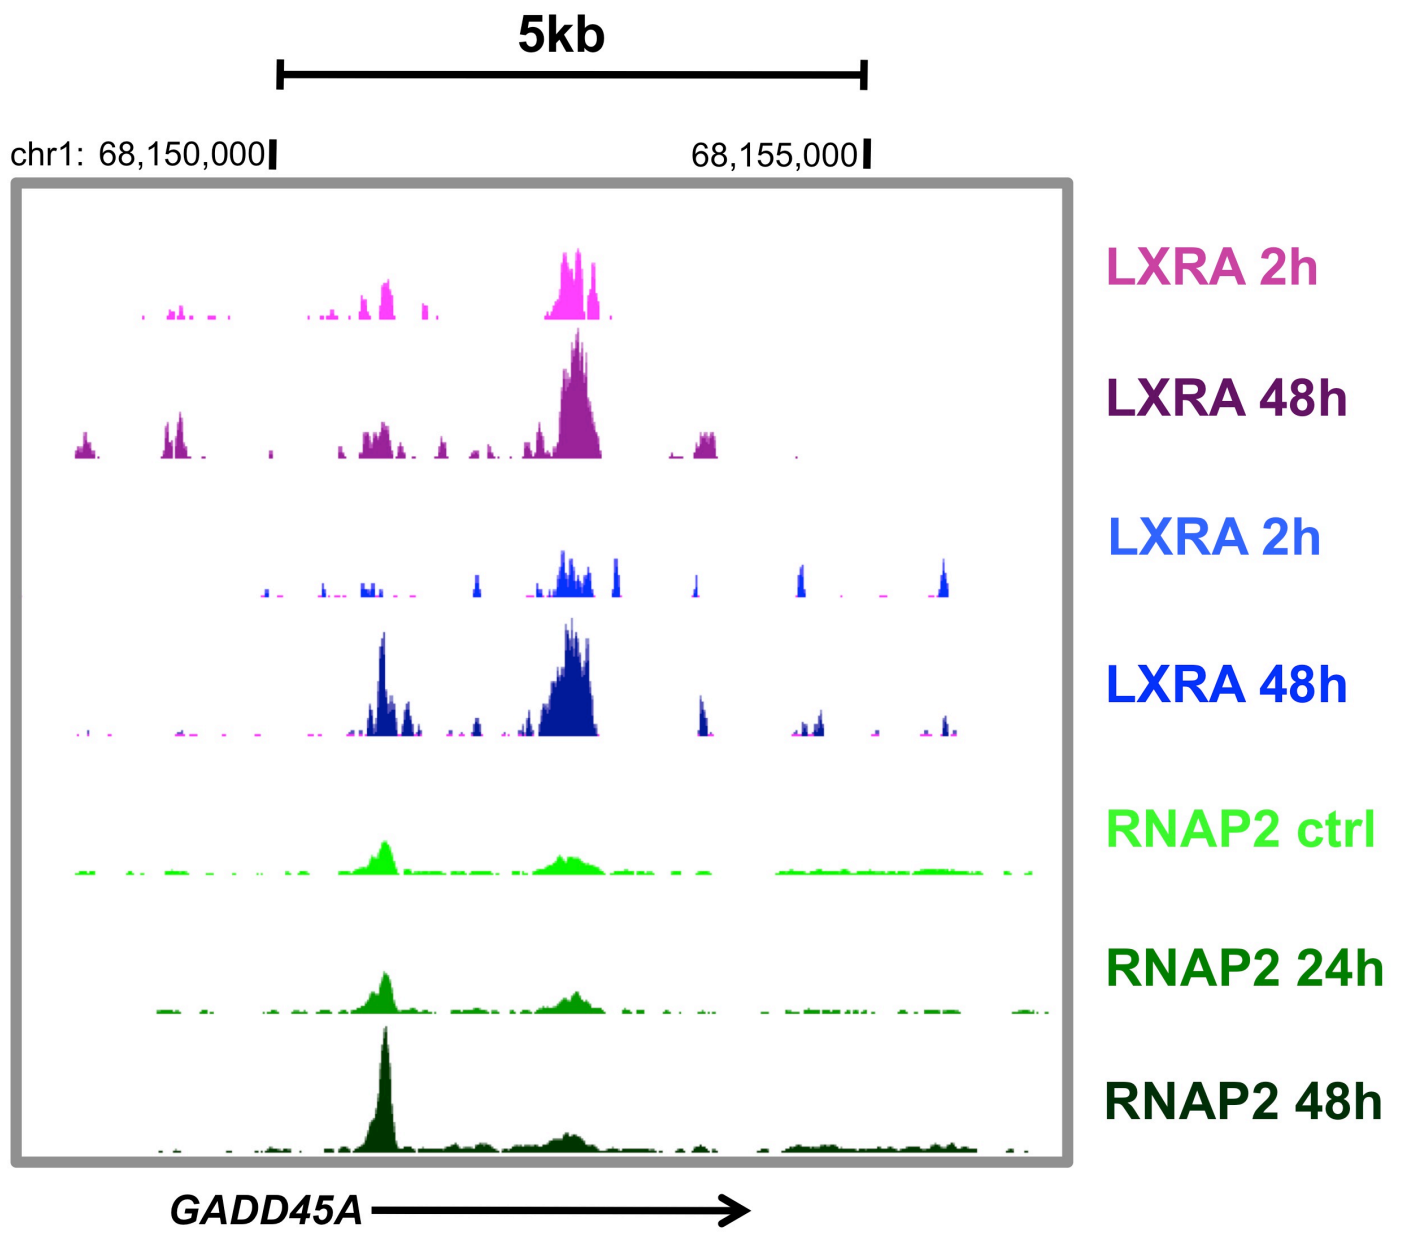

5kb

chr19: 49,375,000

49,800,000

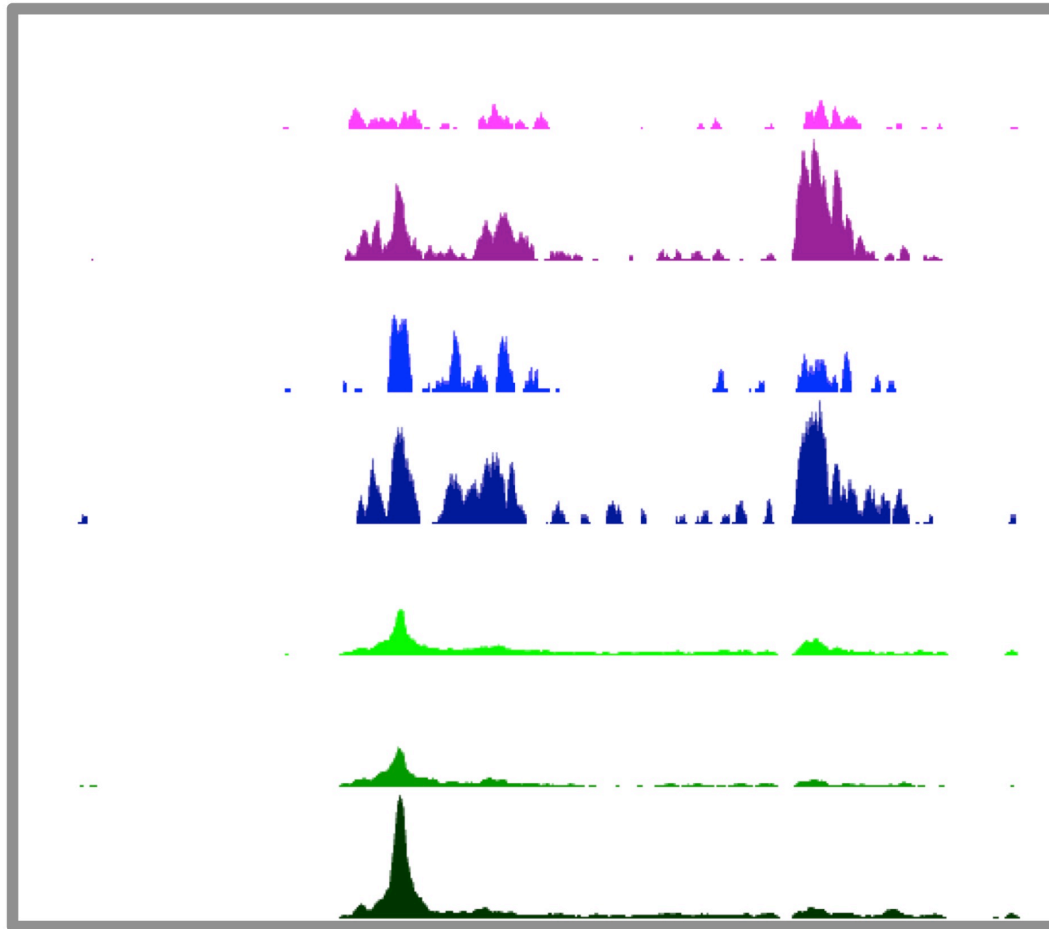

LXRA 2h

LXRA 48h

LXRA 2h

LXRA 48h

RNAP2 ctrl

RNAP2 24h

RNAP2 48h

*PPP1R15A* →

50kb

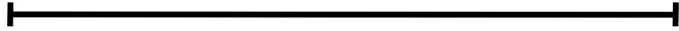

chr10:

11,880,000

11,930,000

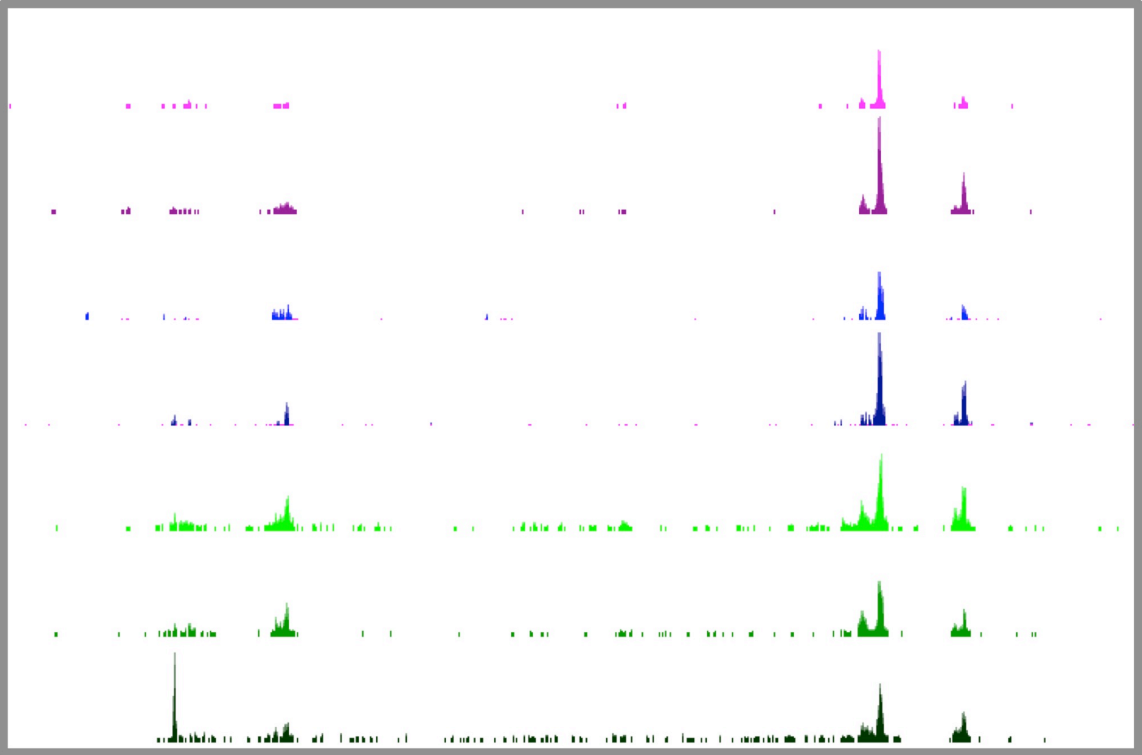

LXRA 2h

LXRA 48h

LXRA 2h

LXRA 48h

RNAP2 ctrl

RNAP2 24h

RNAP2 48h

*PROSER2*

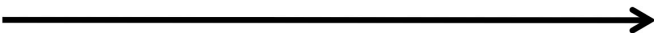

*PROSER2-AS1*

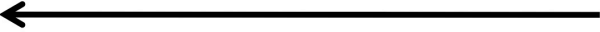

**A**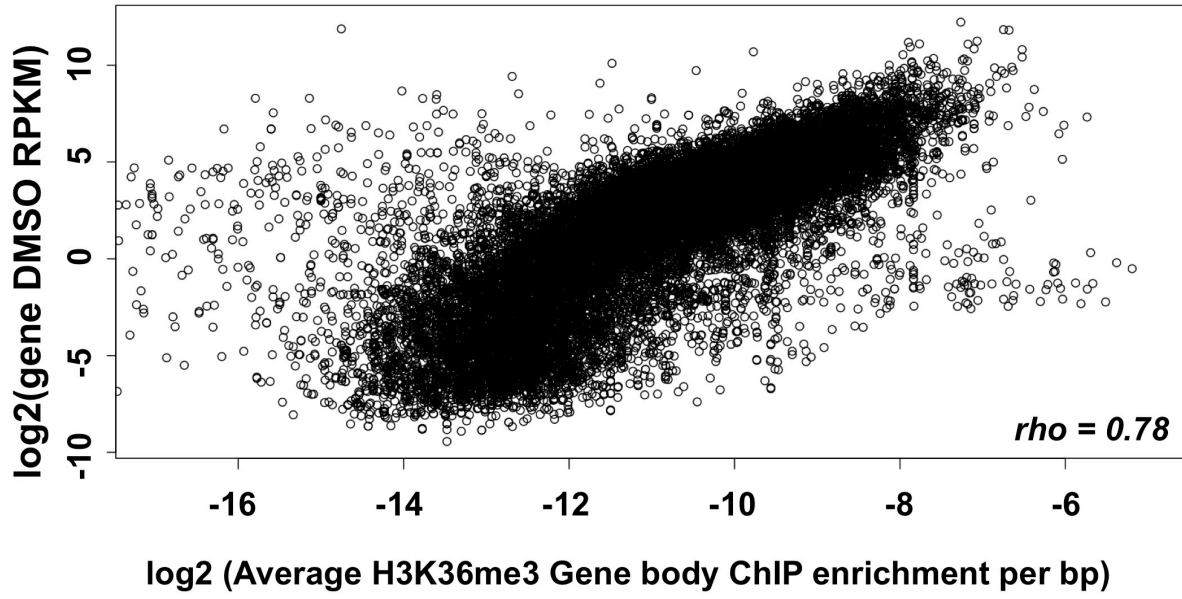**B**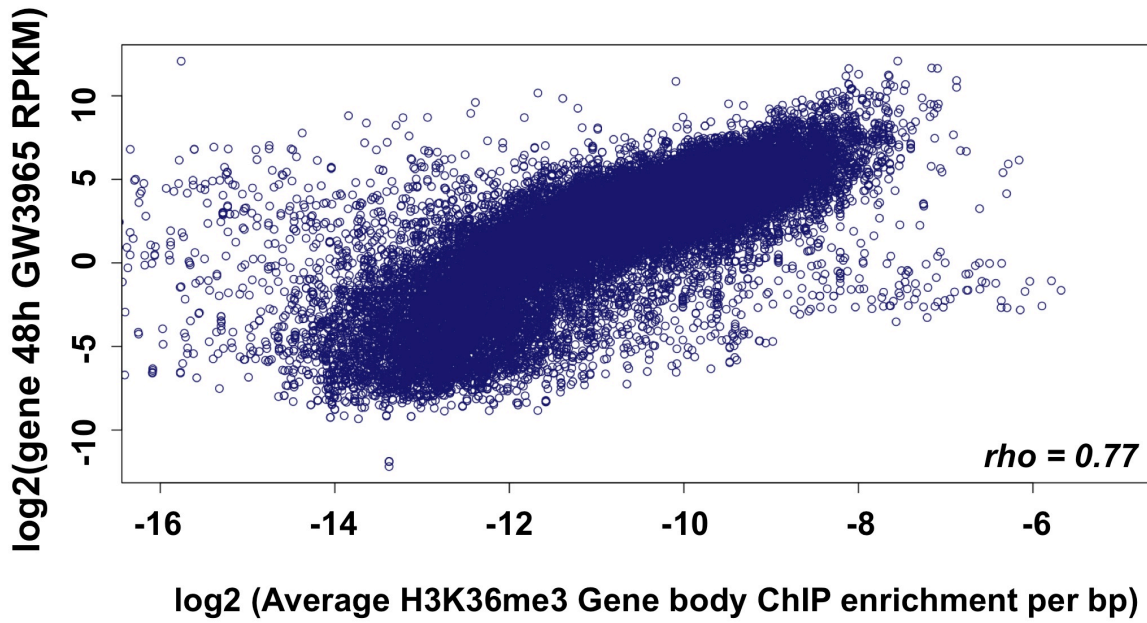

# Gene body H3K36me3 vs gene expression (48h)

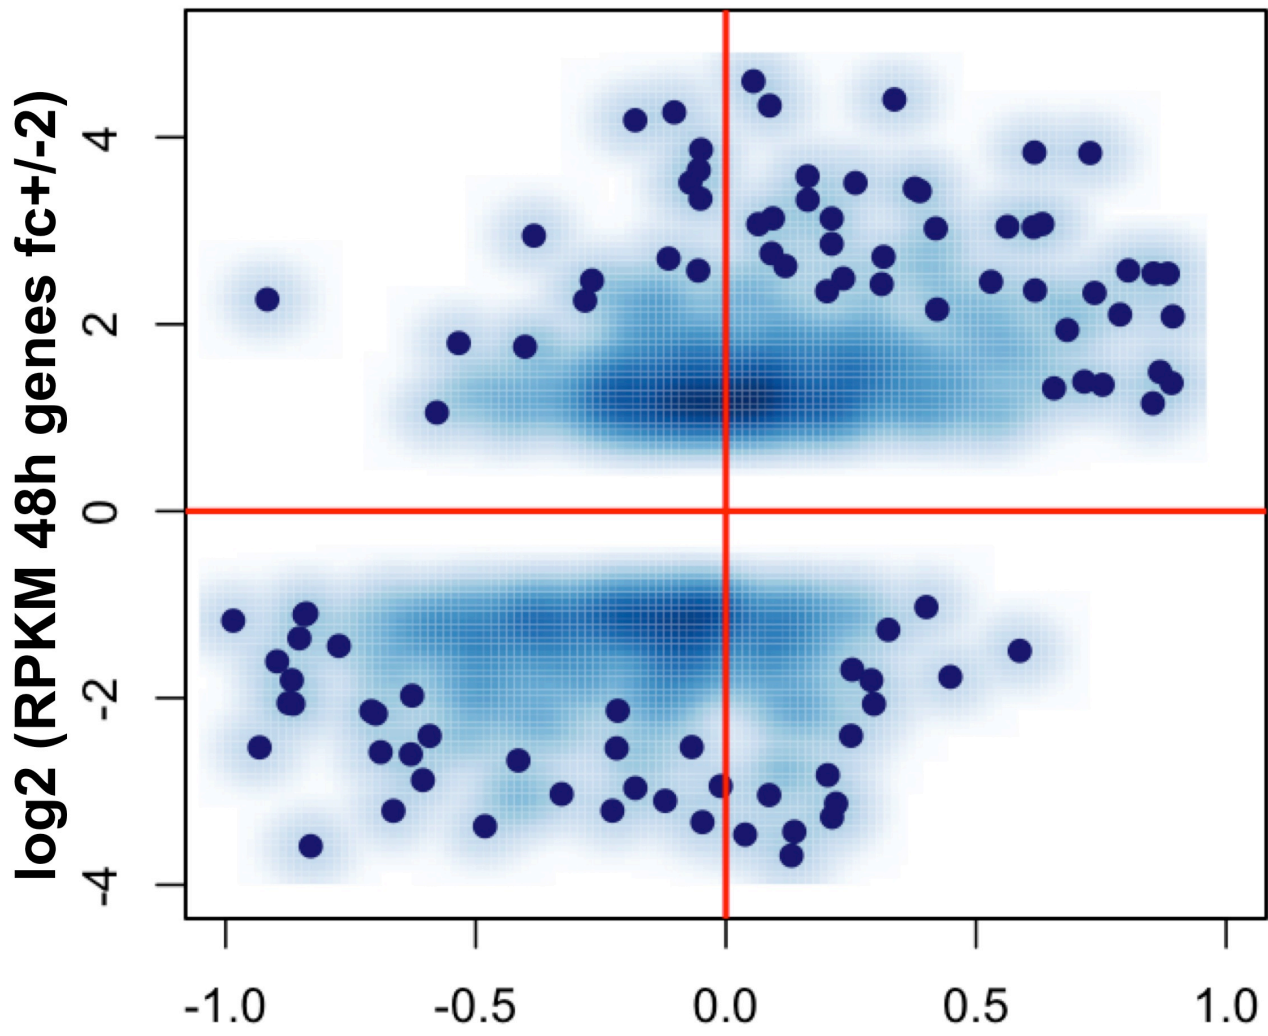

$\log_2(\text{H3K36me3 gene body ChIP enrichment [48h/0h]})$



**A**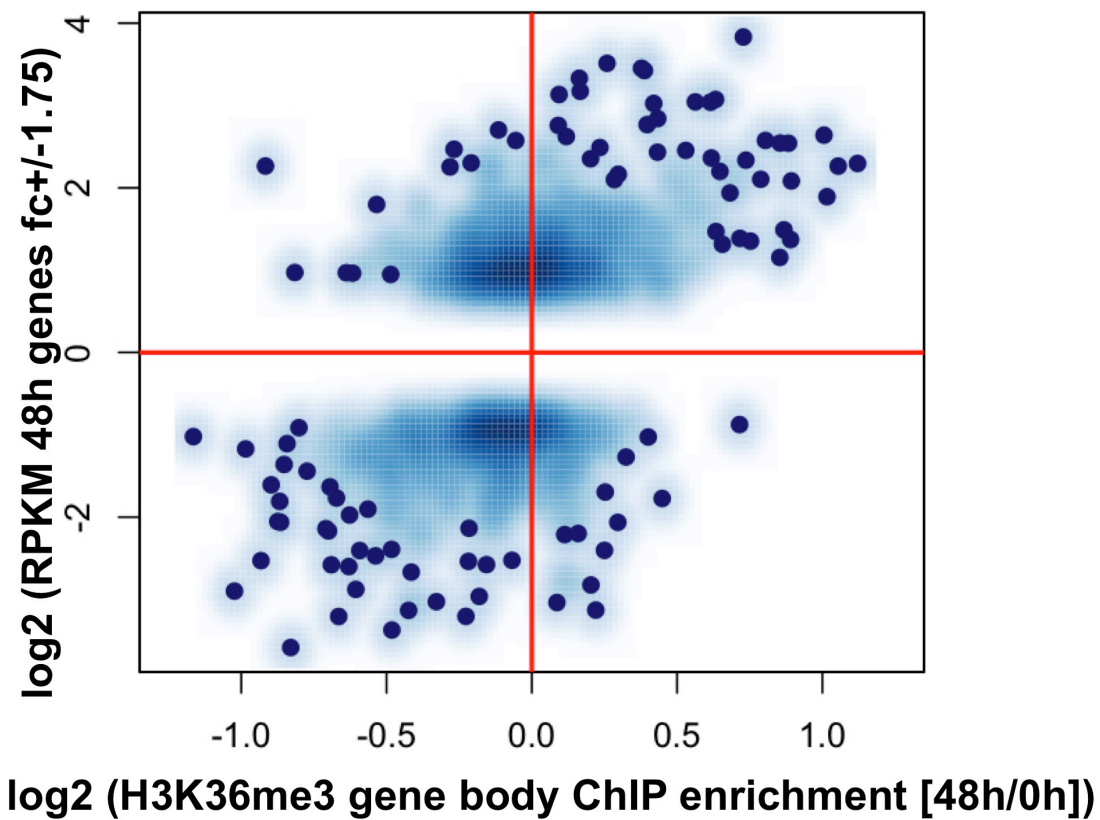**B**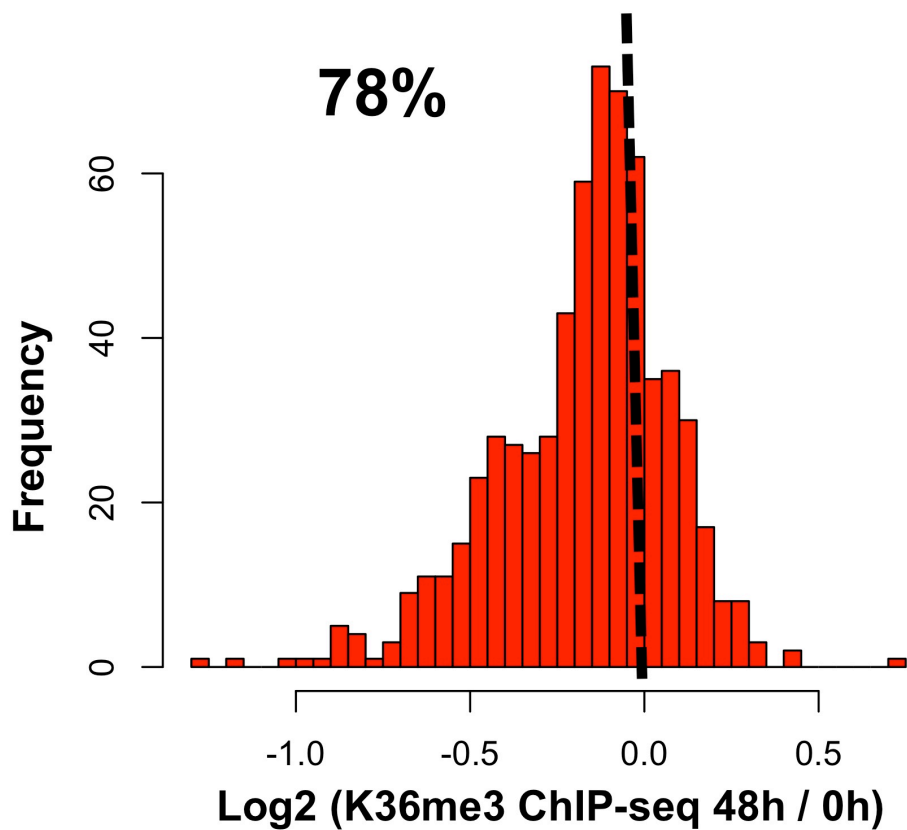



**A**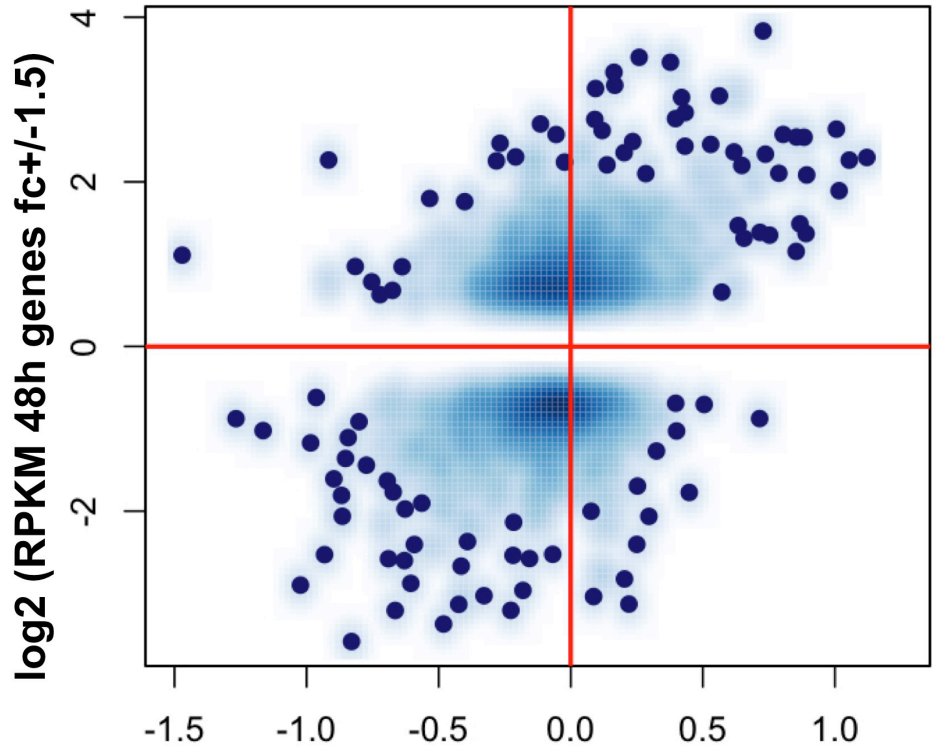

$\log_2(\text{H3K36me3 gene body ChIP enrichment [48h/0h]})$

**B**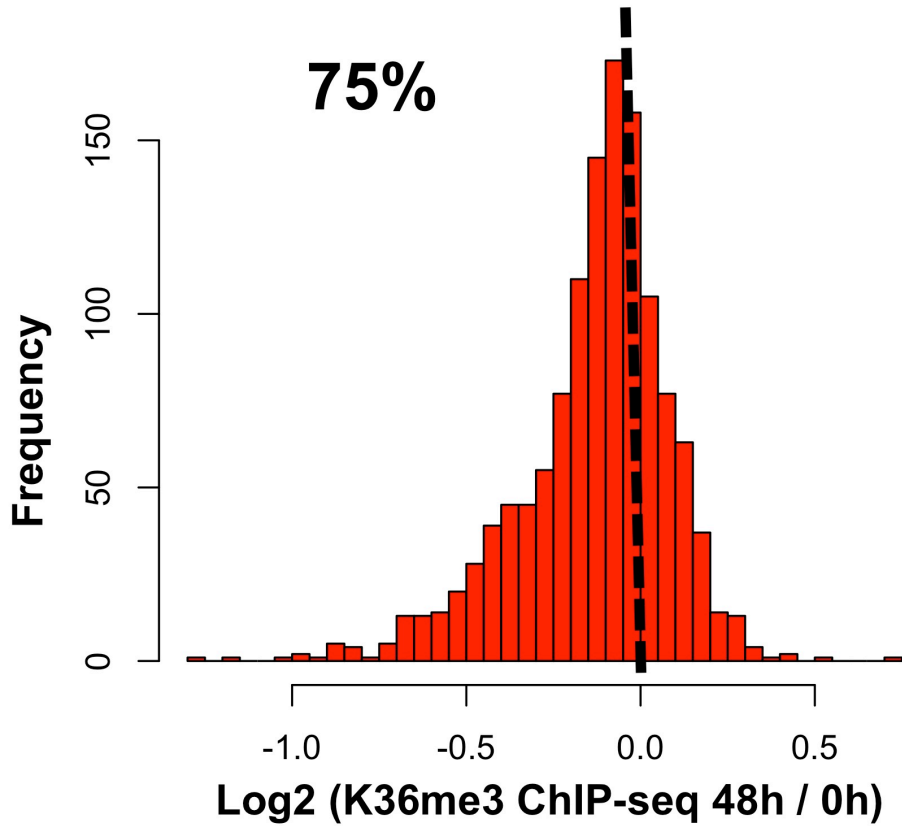

**A****LXRA**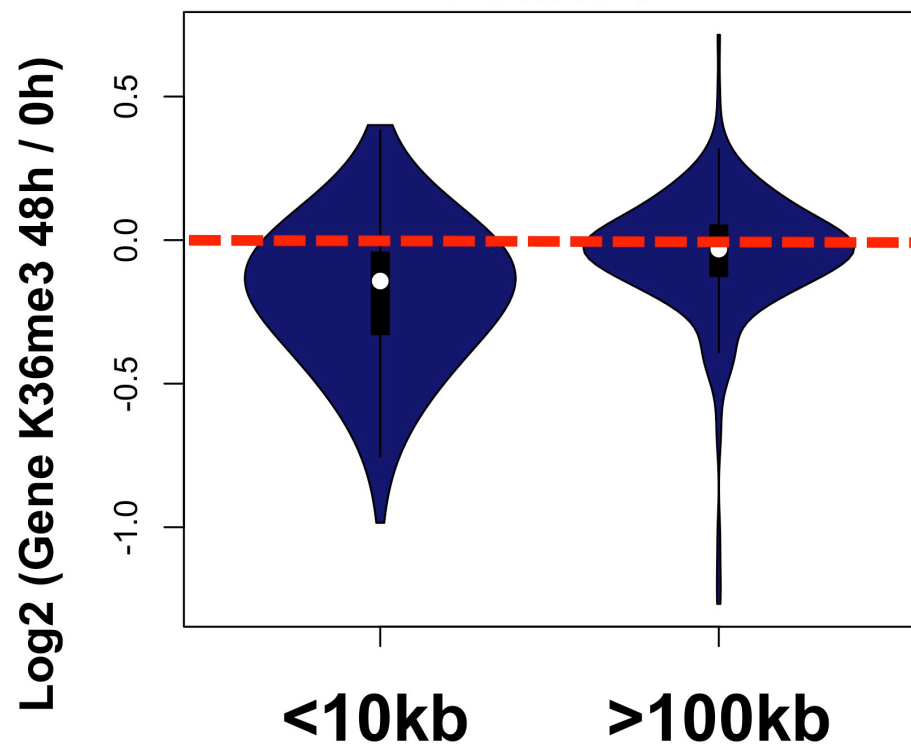**B****LXRB**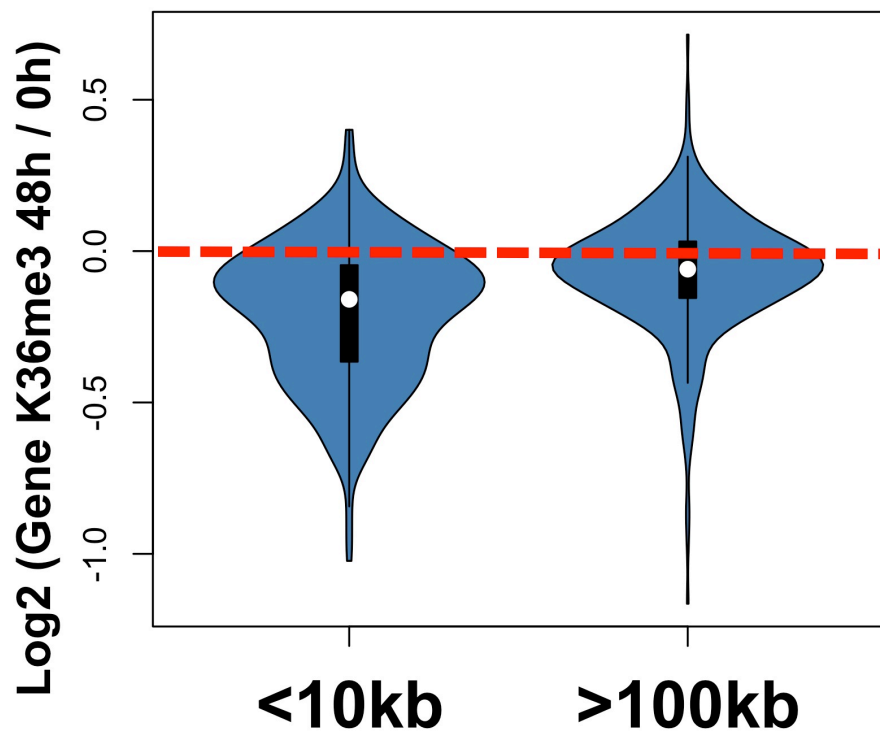

Supplement: 13073_2016_328_MOESM1_ESM.pdf [file 13073_2016_328_MOESM1_ESM.pdf]
