# Supplementary material for: Distinct gene regulatory programs define the inhibitory effects of liver X receptors and PPARG on cancer cell proliferation
Source: PubMed Central journal article supplement (PMC4940857; doi:10.1186/s13073-016-0328-6), 2016-07-11
Supplement: 13073_2016_328_MOESM2_ESM.pdf [file 13073_2016_328_MOESM2_ESM.pdf]

TABLE S1

| Gene Set Name                                    | # Genes | Description                                          | # Genes in Overlap (k) | p-value  | FDR q-value |
|--------------------------------------------------|---------|------------------------------------------------------|------------------------|----------|-------------|
| <b>24h GW3965 up-regulated</b>                   |         |                                                      |                        |          |             |
| KEGG_PPAR_SIGNALING_PATHWAY                      | 69      | PPAR signaling pathway                               | 10                     | 3.00E-13 | 5.58E-11    |
| KEGG_FATTY_ACID_METABOLISM                       | 42      | Fatty acid metabolism                                | 5                      | 8.39E-07 | 6.60E-05    |
| KEGG_ABC_TRANSPORTERS                            | 44      | ABC transporters                                     | 5                      | 1.06E-06 | 6.60E-05    |
| KEGG_ADIPOCYTOKINE_SIGNALING_PATHWAY             | 67      | Adipocytokine signaling pathway                      | 4                      | 1.73E-04 | 8.07E-03    |
| KEGG_INSULIN_SIGNALING_PATHWAY                   | 137     | Insulin signaling pathway                            | 5                      | 2.69E-04 | 1.00E-02    |
| KEGG_PYRUVATE_METABOLISM                         | 40      | Pyruvate metabolism                                  | 3                      | 6.05E-04 | 1.87E-02    |
| KEGG_MTOR_SIGNALING_PATHWAY                      | 52      | mTOR signaling pathway                               | 3                      | 1.30E-03 | 3.45E-02    |
| KEGG_GLYCOPHINGOLIPID_BIOSYNTHESIS_GLOBO_SERIES  | 14      | Glycosphingolipid biosynthesis - globo series        | 2                      | 1.48E-03 | 3.45E-02    |
| KEGG_GLYCOLYSIS_GLUONEOGENESIS                   | 62      | Glycolysis / Gluconeogenesis                         | 3                      | 2.17E-03 | 4.48E-02    |
| KEGG_PATHWAYS_IN_CANCER                          | 328     | Pathways in cancer                                   | 6                      | 2.48E-03 | 4.55E-02    |
| KEGG_COMPLEMENT_AND_COAGULATION_CASCADES         | 69      | Complement and coagulation cascades                  | 3                      | 2.94E-03 | 4.55E-02    |
| KEGG_P53_SIGNALING_PATHWAY                       | 69      | p53 signaling pathway                                | 3                      | 2.94E-03 | 4.55E-02    |
| KEGG_VIRAL_MYOCARDITIS                           | 73      | Viral myocarditis                                    | 3                      | 3.45E-03 | 4.89E-02    |
| KEGG_BIOSYNTHESIS_OF_UNSATURATED_FATTY_ACIDS     | 22      | Biosynthesis of unsaturated fatty acids              | 2                      | 3.68E-03 | 4.89E-02    |
| <b>24h GW3965 down-regulated</b>                 |         |                                                      |                        |          |             |
| Gene Set Name                                    | # Genes | Description                                          | # Genes in Overlap (k) | p-value  | FDR q-value |
| KEGG_LEUKOCYTE_TRANSENDOTHELIAL_MIGRATION        | 118     | Leukocyte transendothelial migration                 | 4                      | 3.71E-05 | 6.91E-03    |
| KEGG_VIBRIO_CHOLERAE_INFECTION                   | 56      | Vibrio cholerae infection                            | 3                      | 9.63E-05 | 8.96E-03    |
| KEGG_GLYCOSAMINOGLYCAN_BIOSYNTHESIS_CHONDROITIN_ | 22      | Glycosaminoglycan biosynthesis - chondroitin sulfate | 2                      | 5.48E-04 | 3.40E-02    |
| <b>24h T0901317 up-regulated</b>                 |         |                                                      |                        |          |             |
| Gene Set Name                                    | # Genes | Description                                          | # Genes in Overlap (k) | p-value  | FDR q-value |
| KEGG_PPAR_SIGNALING_PATHWAY                      | 69      | PPAR signaling pathway                               | 6                      | 5.92E-08 | 1.10E-05    |
| KEGG_ABC_TRANSPORTERS                            | 44      | ABC transporters                                     | 4                      | 8.82E-06 | 8.21E-04    |
| KEGG_PEROXISOME                                  | 78      | Peroxisome                                           | 4                      | 8.58E-05 | 4.88E-03    |
| KEGG_GLYCINE_SERINE_AND_THREONINE_METABOLISM     | 31      | Glycine, serine and threonine metabolism             | 3                      | 1.05E-04 | 4.88E-03    |
| KEGG_PYRUVATE_METABOLISM                         | 40      | Pyruvate metabolism                                  | 3                      | 2.26E-04 | 8.41E-03    |
| KEGG_MTOR_SIGNALING_PATHWAY                      | 52      | mTOR signaling pathway                               | 3                      | 4.93E-04 | 1.53E-02    |
| KEGG_INSULIN_SIGNALING_PATHWAY                   | 137     | Insulin signaling pathway                            | 4                      | 7.39E-04 | 1.92E-02    |
| KEGG_GLYCOLYSIS_GLUONEOGENESIS                   | 62      | Glycolysis / Gluconeogenesis                         | 3                      | 8.26E-04 | 1.92E-02    |
| KEGG_ADIPOCYTOKINE_SIGNALING_PATHWAY             | 67      | Adipocytokine signaling pathway                      | 3                      | 1.04E-03 | 2.14E-02    |
| KEGG_BIOSYNTHESIS_OF_UNSATURATED_FATTY_ACIDS     | 22      | Biosynthesis of unsaturated fatty acids              | 2                      | 1.90E-03 | 3.52E-02    |
| KEGG_NITROGEN_METABOLISM                         | 23      | Nitrogen metabolism                                  | 2                      | 2.08E-03 | 3.52E-02    |
| KEGG_PATHWAYS_IN_CANCER                          | 328     | Pathways in cancer                                   | 5                      | 2.93E-03 | 4.53E-02    |
| <b>24h T0901317 down-regulated</b>               |         |                                                      |                        |          |             |
| Gene Set Name                                    | # Genes | Description                                          | # Genes in Overlap (k) | p-value  | FDR q-value |
| KEGG_DILATED_CARDIOMYOPATHY                      | 92      | Dilated cardiomyopathy                               | 2                      | 1.10E-04 | 2.05E-02    |

**24h Rosiglitazone up-regulated**

| Gene Set Name                                     | # Genes | Description                                  | # Genes in Overlap (k) | p-value  | FDR q-value |
|---------------------------------------------------|---------|----------------------------------------------|------------------------|----------|-------------|
| KEGG_RETINOL_METABOLISM                           | 64      | Retinol metabolism                           | 12                     | 4.03E-14 | 7.49E-12    |
| KEGG_ASCORBATE_AND_ALDARATE_METABOLISM            | 25      | Ascorbate and aldarate metabolism            | 8                      | 6.79E-12 | 6.31E-10    |
| KEGG_PORPHYRIN_AND_CHLOROPHYLL_METABOLISM         | 41      | Porphyrin and chlorophyll metabolism         | 9                      | 1.41E-11 | 8.76E-10    |
| KEGG_PPAR_SIGNALING_PATHWAY                       | 69      | PPAR signaling pathway                       | 10                     | 8.12E-11 | 3.78E-09    |
| KEGG_DRUG_METABOLISM_OTHER_ENZYMES                | 51      | Drug metabolism - other enzymes              | 9                      | 1.15E-10 | 4.28E-09    |
| KEGG_STARCH_AND_SUCROSE_METABOLISM                | 52      | Starch and sucrose metabolism                | 9                      | 1.38E-10 | 4.29E-09    |
| KEGG_PENTOSE_AND_GLUCURONATE_INTERCONVERSIONS     | 28      | Pentose and glucuronate interconversions     | 7                      | 1.02E-09 | 2.72E-08    |
| KEGG_DRUG_METABOLISM_CYTOCHROME_P450              | 72      | Drug metabolism - cytochrome P450            | 9                      | 2.82E-09 | 6.55E-08    |
| KEGG_STEROID_HORMONE_BIOSYNTHESIS                 | 55      | Steroid hormone biosynthesis                 | 8                      | 6.33E-09 | 1.31E-07    |
| KEGG_METABOLISM_OF_XENOBIOTICS_BY_CYTOCHROME_P450 | 70      | Metabolism of xenobiotics by cytochrome P450 | 8                      | 4.46E-08 | 8.30E-07    |
| KEGG_BUTANOATE_METABOLISM                         | 34      | Butanoate metabolism                         | 6                      | 1.57E-07 | 2.65E-06    |
| KEGG_CALCIIUM_SIGNALING_PATHWAY                   | 178     | Calcium signaling pathway                    | 9                      | 6.81E-06 | 1.06E-04    |
| KEGG_FATTY_ACID_METABOLISM                        | 42      | Fatty acid metabolism                        | 5                      | 1.32E-05 | 1.89E-04    |
| KEGG_GLYCEROPHOSPHOLIPID_METABOLISM               | 77      | Glycerophospholipid metabolism               | 6                      | 2.13E-05 | 2.83E-04    |
| KEGG_PATHWAYS_IN_CANCER                           | 328     | Pathways in cancer                           | 11                     | 3.21E-05 | 3.97E-04    |
| KEGG_GNRH_SIGNALING_PATHWAY                       | 101     | GnRH signaling pathway                       | 6                      | 9.84E-05 | 1.14E-03    |
| KEGG_FOCAL_ADHESION                               | 201     | Focal adhesion                               | 8                      | 1.20E-04 | 1.31E-03    |
| KEGG_VASCULAR_SMOOTH_MUSCLE_CONTRACTION           | 115     | Vascular smooth muscle contraction           | 6                      | 2.01E-04 | 2.07E-03    |
| KEGG_VALINE_LEUCINE_AND_ISOLEUCINE_DEGRADATION    | 44      | Valine, leucine and isoleucine degradation   | 4                      | 2.92E-04 | 2.86E-03    |
| KEGG_TGF_BETA_SIGNALING_PATHWAY                   | 86      | TGF-beta signaling pathway                   | 5                      | 4.18E-04 | 3.88E-03    |
| KEGG_DILATED_CARDIOMYOPATHY                       | 92      | Dilated cardiomyopathy                       | 5                      | 5.69E-04 | 5.04E-03    |
| KEGG_HEDGEHOG_SIGNALING_PATHWAY                   | 56      | Hedgehog signaling pathway                   | 4                      | 7.39E-04 | 6.25E-04    |
| KEGG_MAPK_SIGNALING_PATHWAY                       | 267     | MAPK signaling pathway                       | 8                      | 7.97E-04 | 6.45E-03    |
| KEGG_ARACHIDONIC_ACID_METABOLISM                  | 58      | Arachidonic acid metabolism                  | 4                      | 8.44E-04 | 6.54E-03    |
| KEGG_LINOLEIC_ACID_METABOLISM                     | 29      | Linoleic acid metabolism                     | 3                      | 1.20E-03 | 8.91E-03    |
| KEGG_FRUCTOSE_AND_MANNOSE_METABOLISM              | 34      | Fructose and mannose metabolism              | 3                      | 1.91E-03 | 1.37E-02    |
| KEGG_LIMONENE_AND_PINENE_DEGRADATION              | 10      | Limonene and pinene degradation              | 2                      | 2.27E-03 | 1.53E-02    |
| KEGG_VEGF_SIGNALING_PATHWAY                       | 76      | VEGF signaling pathway                       | 4                      | 2.31E-03 | 1.53E-02    |
| KEGG_AXON_GUIDANCE                                | 129     | Axon guidance                                | 5                      | 2.57E-03 | 1.65E-02    |
| KEGG_TRYPTOPHAN_METABOLISM                        | 40      | Tryptophan metabolism                        | 3                      | 3.05E-03 | 1.89E-02    |
| KEGG_ECM_RECEPTOR_INTERACTION                     | 84      | ECM-receptor interaction                     | 4                      | 3.31E-03 | 1.99E-02    |
| KEGG_CIRCADIAN_RHYTHM_MAMMAL                      | 13      | Circadian rhythm - mammal                    | 2                      | 3.87E-03 | 2.19E-02    |
| KEGG_AMINO_SUGAR_AND_NUCLEOTIDE_SUGAR_METABOLISM  | 44      | Amino sugar and nucleotide sugar metabolism  | 3                      | 4.01E-03 | 2.19E-02    |
| KEGG_VASOPRESSIN_REGULATED_WATER_REABSORPTION     | 44      | Vasopressin-regulated water reabsorption     | 3                      | 4.01E-03 | 2.19E-02    |
| KEGG_WNT_SIGNALING_PATHWAY                        | 151     | Wnt signaling pathway                        | 5                      | 5.02E-03 | 2.67E-02    |
| KEGG_GLYCEROLIPID_METABOLISM                      | 49      | Glycerolipid metabolism                      | 3                      | 5.43E-03 | 2.81E-02    |
| KEGG_ALPHA_LINOLENIC_ACID_METABOLISM              | 19      | alpha-Linolenic acid metabolism              | 2                      | 8.25E-03 | 4.15E-02    |
| KEGG_ACUTE_MYELOID_LEUKEMIA                       | 60      | Acute myeloid leukemia                       | 3                      | 9.51E-03 | 4.62E-02    |
| KEGG_OOCYTE_MEIOSIS                               | 114     | Oocyte meiosis                               | 4                      | 9.68E-03 | 4.62E-02    |
| KEGG_COLORECTAL_CANCER                            | 62      | Colorectal cancer                            | 3                      | 1.04E-02 | 4.72E-02    |
| KEGG_GLYCOLYSIS_GLUconeogenesis                   | 62      | Glycolysis / Gluconeogenesis                 | 3                      | 1.04E-02 | 4.72E-02    |
| KEGG_BETA_ALANINE_METABOLISM                      | 22      | beta-Alanine metabolism                      | 2                      | 1.10E-02 | 4.87E-02    |

**24h Rosiglitazone down-regulated**

| Gene Set Name                                                 | # Genes | Description                                                | # Genes in Overlap (k) | p-value  | FDR q-value |
|---------------------------------------------------------------|---------|------------------------------------------------------------|------------------------|----------|-------------|
| KEGG_TAURINE_AND_HYPOTAURINE_METABOLISM                       | 10      | Taurine and hypotaurine metabolism                         | 5                      | 6.44E-08 | 1.20E-05    |
| KEGG_MAPK_SIGNALING_PATHWAY                                   | 267     | MAPK signaling pathway                                     | 14                     | 6.44E-06 | 5.99E-04    |
| KEGG_O_GLYCAN_BIOSYNTHESIS                                    | 30      | O-Glycan biosynthesis                                      | 5                      | 2.97E-05 | 1.49E-03    |
| KEGG_AXON_GUIDANCE                                            | 129     | Axon guidance                                              | 9                      | 3.21E-05 | 1.49E-03    |
| KEGG_ARACHIDONIC_ACID_METABOLISM                              | 58      | Arachidonic acid metabolism                                | 6                      | 7.69E-05 | 2.86E-03    |
| KEGG_DILATED_CARDIOMYOPATHY                                   | 92      | Dilated cardiomyopathy                                     | 7                      | 1.41E-04 | 4.36E-03    |
| KEGG_MATURITY_ONSET_DIABETES_OF_THE_YOUNG                     | 25      | Maturity onset diabetes of the young                       | 4                      | 2.28E-04 | 4.97E-03    |
| KEGG_N_GLYCAN_BIOSYNTHESIS                                    | 46      | N-Glycan biosynthesis                                      | 5                      | 2.44E-04 | 4.97E-03    |
| KEGG_GLYCOSPHINGOLIPID_BIOSYNTHESIS_LACTO_AND_NEOLACTO_SERIES | 26      | Glycosphingolipid biosynthesis - lacto and neolacto series | 4                      | 2.67E-04 | 4.97E-03    |
| KEGG_SELENOAMINO_ACID_METABOLISM                              | 26      | Selenoamino acid metabolism                                | 4                      | 2.67E-04 | 4.97E-03    |
| KEGG_GLYCOSPHINGOLIPID_BIOSYNTHESIS_GLOBO_SERIES              | 14      | Glycosphingolipid biosynthesis - globo series              | 3                      | 5.99E-04 | 9.52E-03    |
| KEGG_VIBRIO_CHOLERAE_INFECTION                                | 56      | Vibrio cholerae infection                                  | 5                      | 6.14E-04 | 9.52E-03    |
| KEGG_JAK_STAT_SIGNALING_PATHWAY                               | 155     | Jak-STAT signaling pathway                                 | 8                      | 6.82E-04 | 9.75E-03    |
| KEGG_COMPLEMENT_AND_COAGULATION_CASCADES                      | 69      | Complement and coagulation cascades                        | 5                      | 1.59E-03 | 1.99E-02    |
| KEGG_MELANOGENESIS                                            | 102     | Melanogenesis                                              | 6                      | 1.63E-03 | 1.99E-02    |
| KEGG_ALDOSTERONE_REGULATED_SODIUM_REABSORPTION                | 42      | Aldosterone-regulated sodium reabsorption                  | 4                      | 1.71E-03 | 1.99E-02    |
| KEGG_VASOPRESSIN_REGULATED_WATER_REABSORPTION                 | 44      | Vasopressin-regulated water reabsorption                   | 4                      | 2.04E-03 | 2.23E-02    |
| KEGG_ARRHYTHMOGENIC_RIGHT_VENTRICULAR_CARDIOMYOPATHY          | 76      | Arrhythmogenic right ventricular cardiomyopathy (AR)       | 5                      | 2.43E-03 | 2.38E-02    |
| KEGG_PATHWAYS_IN_CANCER                                       | 328     | Pathways in cancer                                         | 11                     | 2.60E-03 | 2.38E-02    |
| KEGG_NITROGEN_METABOLISM                                      | 23      | Nitrogen metabolism                                        | 3                      | 2.69E-03 | 2.38E-02    |
| KEGG_PROXIMAL_TUBULE_BICARBONATE_RECLAMATION                  | 23      | Proximal tubule bicarbonate reclamation                    | 3                      | 2.69E-03 | 2.38E-02    |
| KEGG_HYPERTROPHIC_CARDIOMYOPATHY_HCM                          | 85      | Hypertrophic cardiomyopathy (HCM)                          | 5                      | 3.95E-03 | 3.34E-02    |
| KEGG_ARGININE_AND_PROLINE_METABOLISM                          | 54      | Arginine and proline metabolism                            | 4                      | 4.32E-03 | 3.38E-02    |
| KEGG_ERBB_SIGNALING_PATHWAY                                   | 87      | ErbB signaling pathway                                     | 5                      | 4.36E-03 | 3.38E-02    |
| KEGG_HEMATOPOIETIC_CELL_LINEAGE                               | 88      | Hematopoietic cell lineage                                 | 5                      | 4.58E-03 | 3.41E-02    |
| KEGG_GAP_JUNCTION                                             | 90      | Gap junction                                               | 5                      | 5.04E-03 | 3.60E-02    |
| KEGG_CALCIIUM_SIGNALING_PATHWAY                               | 178     | Calcium signaling pathway                                  | 7                      | 6.56E-03 | 4.52E-02    |
| KEGG_ALANINE_ASPARTATE_AND_Glutamate_METABOLISM               | 32      | Alanine, aspartate and glutamate metabolism                | 3                      | 6.93E-03 | 4.61E-02    |

| <b>48h GW3965 up-regulated</b>                                  |         |                                                            |                        |          |             |
|-----------------------------------------------------------------|---------|------------------------------------------------------------|------------------------|----------|-------------|
| Gene Set Name                                                   | # Genes | Description                                                | # Genes in Overlap (k) | p-value  | FDR q-value |
| KEGG_GLYCEROPHOSPHOLIPID_METABOLISM                             | 77      | Glycerophospholipid metabolism                             | 19                     | 2.01E-12 | 2.54E-10    |
| KEGG_PPAR_SIGNALING_PATHWAY                                     | 69      | PPAR signaling pathway                                     | 18                     | 2.73E-12 | 2.54E-10    |
| KEGG_LYSOSOME                                                   | 121     | Lysosome                                                   | 21                     | 1.82E-10 | 1.13E-08    |
| KEGG_ARACHIDONIC_ACID_METABOLISM                                | 58      | Arachidonic acid metabolism                                | 14                     | 2.21E-09 | 1.03E-07    |
| KEGG_STEROID_BIOSYNTHESIS                                       | 17      | Steroid biosynthesis                                       | 8                      | 1.68E-08 | 6.24E-07    |
| KEGG_SULFUR_METABOLISM                                          | 13      | Sulfur metabolism                                          | 7                      | 4.15E-08 | 1.29E-06    |
| KEGG_MAPK_SIGNALING_PATHWAY                                     | 267     | MAPK signaling pathway                                     | 27                     | 1.04E-07 | 2.77E-06    |
| KEGG_GLYCEROLIPID_METABOLISM                                    | 49      | Glycerolipid metabolism                                    | 11                     | 2.59E-07 | 6.03E-06    |
| KEGG_GLYCOLYSIS_GLUconeogenesis                                 | 62      | Glycolysis / Gluconeogenesis                               | 12                     | 4.19E-07 | 8.65E-06    |
| KEGG_ETHER_LIPID_METABOLISM                                     | 33      | Ether lipid metabolism                                     | 9                      | 5.39E-07 | 1.00E-05    |
| KEGG_PATHWAYS_IN_CANCER                                         | 328     | Pathways in cancer                                         | 29                     | 6.20E-07 | 1.05E-05    |
| KEGG_BUTANOATE_METABOLISM                                       | 34      | Butanoate metabolism                                       | 9                      | 7.13E-07 | 1.11E-05    |
| KEGG_PEROXISOME                                                 | 78      | Peroxisome                                                 | 13                     | 8.51E-07 | 1.22E-05    |
| KEGG_FC_GAMMA_R_MEDIATED_PHAGOCYTOSIS                           | 97      | Fc gamma R-mediated phagocytosis                           | 14                     | 1.96E-06 | 2.61E-05    |
| KEGG_VEGF_SIGNALING_PATHWAY                                     | 76      | VEGF signaling pathway                                     | 12                     | 4.02E-06 | 4.99E-05    |
| KEGG_PENTOSE_PHOSPHATE_PATHWAY                                  | 27      | Pentose phosphate pathway                                  | 7                      | 1.46E-05 | 1.70E-04    |
| KEGG_ENDOCYTOSIS                                                | 183     | Endocytosis                                                | 18                     | 1.94E-05 | 2.12E-04    |
| KEGG_SPHINGOLIPID_METABOLISM                                    | 40      | Sphingolipid metabolism                                    | 8                      | 2.80E-05 | 2.89E-04    |
| KEGG_FATTY_ACID_METABOLISM                                      | 42      | Fatty acid metabolism                                      | 8                      | 4.06E-05 | 3.98E-04    |
| KEGG_GLYCOSAMINOGLYCAN_BIOSYNTHESIS_CHONDROITIN_SULFATE         | 22      | Glycosaminoglycan biosynthesis - chondroitin sulfate       | 6                      | 4.45E-05 | 4.14E-04    |
| KEGG_BASAL_CELL_CARCINOMA                                       | 55      | Basal cell carcinoma                                       | 9                      | 4.80E-05 | 4.25E-04    |
| KEGG_HEDGEHOG_SIGNALING_PATHWAY                                 | 56      | Hedgehog signaling pathway                                 | 9                      | 5.56E-05 | 4.30E-04    |
| KEGG_ABC_TRANSPORTERS                                           | 44      | ABC transporters                                           | 8                      | 5.77E-05 | 4.30E-04    |
| KEGG_AMINO_SUGAR_AND_NUCLEOTIDE_SUGAR_METABOLISM                | 44      | Amino sugar and nucleotide sugar metabolism                | 8                      | 5.77E-05 | 4.30E-04    |
| KEGG_VALINE_LEUCINE_AND_ISOLEUCINE_DEGRADATION                  | 44      | Valine, leucine and isoleucine degradation                 | 8                      | 5.77E-05 | 4.30E-04    |
| KEGG_GLYCOSPHINGOLIPID_BIOSYNTHESIS_GANGLIO_SERIES              | 15      | Glycosphingolipid biosynthesis - ganglio series            | 5                      | 6.81E-05 | 4.69E-04    |
| KEGG_TERPENOID_BACKBONE_BIOSYNTHESIS                            | 15      | Terpenoid backbone biosynthesis                            | 5                      | 6.81E-05 | 4.69E-04    |
| KEGG_FRUCTOSE_AND_MANNOSE_METABOLISM                            | 34      | Fructose and mannose metabolism                            | 7                      | 7.32E-05 | 4.87E-04    |
| KEGG_N_GLYCAN_BIOSYNTHESIS                                      | 46      | N-Glycan biosynthesis                                      | 8                      | 8.04E-05 | 5.16E-04    |
| KEGG_GALACTOSE_METABOLISM                                       | 26      | Galactose metabolism                                       | 6                      | 1.23E-04 | 7.65E-04    |
| KEGG_CALCIIUM_SIGNALING_PATHWAY                                 | 178     | Calcium signaling pathway                                  | 16                     | 1.60E-04 | 9.58E-04    |
| KEGG_AXON_GUIDANCE                                              | 129     | Axon guidance                                              | 13                     | 2.10E-04 | 1.22E-03    |
| KEGG_GNRH_SIGNALING_PATHWAY                                     | 101     | GnRH signaling pathway                                     | 11                     | 3.23E-04 | 1.72E-03    |
| KEGG_METABOLISM_OF_XENOBIOTICS_BY_CYTOCHROME_P450               | 70      | Metabolism of xenobiotics by cytochrome P450               | 9                      | 3.23E-04 | 1.72E-03    |
| KEGG_PANCREATIC_CANCER                                          | 70      | Pancreatic cancer                                          | 9                      | 3.23E-04 | 1.72E-03    |
| KEGG_INSULIN_SIGNALING_PATHWAY                                  | 137     | Insulin signaling pathway                                  | 13                     | 3.79E-04 | 1.96E-03    |
| KEGG_GLYCOSAMINOGLYCAN_DEGRADATION                              | 21      | Glycosaminoglycan degradation                              | 5                      | 3.95E-04 | 1.99E-03    |
| KEGG_BIOSYNTHESIS_OF_UNSATURATED_FATTY_ACIDS                    | 22      | Biosynthesis of unsaturated fatty acids                    | 5                      | 4.98E-04 | 2.44E-03    |
| KEGG_PHOSPHATIDYLINOSITOL_SIGNALING_SYSTEM                      | 76      | Phosphatidylinositol signaling system                      | 9                      | 5.99E-04 | 2.86E-03    |
| KEGG_FC_EPSILON_RI_SIGNALING_PATHWAY                            | 79      | Fc epsilon RI signaling pathway                            | 9                      | 7.97E-04 | 3.70E-03    |
| KEGG_MATURITY_ONSET_DIABETES_OF_THE_YOUNG                       | 25      | Maturity onset diabetes of the young                       | 5                      | 9.30E-04 | 4.22E-03    |
| KEGG_WNT_SIGNALING_PATHWAY                                      | 151     | Wnt signaling pathway                                      | 13                     | 9.53E-04 | 4.22E-03    |
| KEGG_GLYCOSPHINGOLIPID_BIOSYNTHESIS_LACTO_AND_NEOLACTOSE_SERIES | 26      | Glycosphingolipid biosynthesis - lacto and neolacto series | 5                      | 1.12E-03 | 4.85E-03    |
| KEGG_LEUKOCYTE_TRANSENDOTHELIAL_MIGRATION                       | 118     | Leukocyte transendothelial migration                       | 11                     | 1.20E-03 | 5.09E-03    |
| KEGG_INOSITOL_PHOSPHATE_METABOLISM                              | 54      | Inositol phosphate metabolism                              | 7                      | 1.40E-03 | 5.61E-03    |
| KEGG_NON_SMALL_CELL_LUNG_CANCER                                 | 54      | Non-small cell lung cancer                                 | 7                      | 1.40E-03 | 5.61E-03    |
| KEGG_PYRUVATE_METABOLISM                                        | 40      | Pyruvate metabolism                                        | 6                      | 1.42E-03 | 5.61E-03    |
| KEGG_CYTOKINE_CYTOKINE_RECEPTOR_INTERACTION                     | 267     | Cytokine-cytokine receptor interaction                     | 18                     | 2.00E-03 | 7.59E-03    |
| KEGG_GAP_JUNCTION                                               | 90      | Gap junction                                               | 9                      | 2.02E-03 | 7.59E-03    |
| KEGG_PHENYLALANINE_METABOLISM                                   | 18      | Phenylalanine metabolism                                   | 4                      | 2.04E-03 | 7.59E-03    |
| KEGG_DILATED_CARDIOMYOPATHY                                     | 92      | Dilated cardiomyopathy                                     | 9                      | 2.35E-03 | 8.57E-03    |
| KEGG_COLORECTAL_CANCER                                          | 62      | Colorectal cancer                                          | 7                      | 3.14E-03 | 1.12E-02    |
| KEGG_BASE_EXCISION_REPAIR                                       | 35      | Base excision repair                                       | 5                      | 4.39E-03 | 1.51E-02    |
| KEGG_PRION_DISEASES                                             | 35      | Prion diseases                                             | 5                      | 4.39E-03 | 1.51E-02    |
| KEGG_ADIPOCYTOKINE_SIGNALING_PATHWAY                            | 67      | Adipocytokine signaling pathway                            | 7                      | 4.86E-03 | 1.64E-02    |
| KEGG_TGF_BETA_SIGNALING_PATHWAY                                 | 86      | TGF-beta signaling pathway                                 | 8                      | 5.48E-03 | 1.76E-02    |
| KEGG_ENDOMETRIAL_CANCER                                         | 52      | Endometrial cancer                                         | 6                      | 5.48E-03 | 1.76E-02    |
| KEGG_TASTE_TRANSDUCTION                                         | 52      | Taste transduction                                         | 6                      | 5.48E-03 | 1.76E-02    |
| KEGG_LONG_TERM_DEPRESSION                                       | 70      | Long-term depression                                       | 7                      | 6.18E-03 | 1.95E-02    |
| KEGG_APOPTOSIS                                                  | 88      | Apoptosis                                                  | 8                      | 6.28E-03 | 1.95E-02    |
| KEGG_ARGININE_AND_PROLINE_METABOLISM                            | 54      | Arginine and proline metabolism                            | 6                      | 6.60E-03 | 2.01E-02    |
| KEGG_ANTIEN_PROCESSING_AND_PRESENTATION                         | 89      | Antigen processing and presentation                        | 8                      | 6.72E-03 | 2.02E-02    |
| KEGG_CHEMOKINE_SIGNALING_PATHWAY                                | 190     | Chemokine signaling pathway                                | 13                     | 7.00E-03 | 2.07E-02    |
| KEGG_STEROID_HORMONE_BIOSYNTHESIS                               | 55      | Steroid hormone biosynthesis                               | 6                      | 7.22E-03 | 2.10E-02    |
| KEGG_REGULATION_OF_ACTIN_CYTOSKELETON                           | 216     | Regulation of actin cytoskeleton                           | 14                     | 8.33E-03 | 2.38E-02    |
| KEGG_B_CELL_RECEPTOR_SIGNALING_PATHWAY                          | 75      | B cell receptor signaling pathway                          | 7                      | 8.96E-03 | 2.52E-02    |
| KEGG_CELL_ADHESION_MOLECULES_CAMS                               | 134     | Cell adhesion molecules (CAMs)                             | 10                     | 9.54E-03 | 2.59E-02    |
| KEGG_BLADDER_CANCER                                             | 42      | Bladder cancer                                             | 5                      | 9.62E-03 | 2.59E-02    |
| KEGG_TYROSINE_METABOLISM                                        | 42      | Tyrosine metabolism                                        | 5                      | 9.62E-03 | 2.59E-02    |
| KEGG_VASCULAR_SMOOTH_MUSCLE_CONTRACTION                         | 115     | Vascular smooth muscle contraction                         | 9                      | 1.01E-02 | 2.69E-02    |
| KEGG_GLYCOSAMINOGLYCAN_BIOSYNTHESIS_KERATAN_SULFATE             | 15      | Glycosaminoglycan biosynthesis - keratan sulfate           | 3                      | 1.04E-02 | 2.73E-02    |
| KEGG_FOCAL_ADHESION                                             | 201     | Focal adhesion                                             | 13                     | 1.09E-02 | 2.82E-02    |
| KEGG_HISTIDINE_METABOLISM                                       | 29      | Histidine metabolism                                       | 4                      | 1.21E-02 | 3.01E-02    |
| KEGG_LINOLEIC_ACID_METABOLISM                                   | 29      | Linoleic acid metabolism                                   | 4                      | 1.21E-02 | 3.01E-02    |
| KEGG_NEUROACTIVE_LIGAND_RECEPTOR_INTERACTION                    | 272     | Neuroactive ligand-receptor interaction                    | 16                     | 1.21E-02 | 3.01E-02    |
| KEGG_OTHER_GLYCAN_DEGRADATION                                   | 16      | Other glycan degradation                                   | 3                      | 1.25E-02 | 3.03E-02    |
| KEGG_PRIMARY_BILE_ACID_BIOSYNTHESIS                             | 16      | Primary bile acid biosynthesis                             | 3                      | 1.25E-02 | 3.03E-02    |
| KEGG_MELANOGENESIS                                              | 102     | Melanogenesis                                              | 8                      | 1.47E-02 | 3.50E-02    |
| KEGG_TYPE_II_DIABETES_MELLITUS                                  | 47      | Type II diabetes mellitus                                  | 5                      | 1.53E-02 | 3.60E-02    |
| KEGG_ECM_RECEPTOR_INTERACTION                                   | 84      | ECM-receptor interaction                                   | 7                      | 1.61E-02 | 3.70E-02    |
| KEGG_SMALL_CELL_LUNG_CANCER                                     | 84      | Small cell lung cancer                                     | 7                      | 1.61E-02 | 3.70E-02    |
| KEGG_HYPERTROPHIC_CARDIOMYOPATHY_HCM                            | 85      | Hypertrophic cardiomyopathy (HCM)                          | 7                      | 1.71E-02 | 3.87E-02    |
| KEGG_PROPANOATE_METABOLISM                                      | 33      | Propanoate metabolism                                      | 4                      | 1.89E-02 | 4.23E-02    |
| KEGG_GLUTATHIONE_METABOLISM                                     | 50      | Glutathione metabolism                                     | 5                      | 1.96E-02 | 4.33E-02    |
| KEGG_T_CELL_RECEPTOR_SIGNALING_PATHWAY                          | 108     | T cell receptor signaling pathway                          | 8                      | 2.01E-02 | 4.38E-02    |
| KEGG_ALPHA_LINOLENIC_ACID_METABOLISM                            | 19      | alpha-Linolenic acid metabolism                            | 3                      | 2.03E-02 | 4.38E-02    |
| KEGG_COMPLEMENT_AND_COAGULATION_CASCADES                        | 69      | Complement and coagulation cascades                        | 6                      | 2.07E-02 | 4.38E-02    |
| KEGG_P53_SIGNALING_PATHWAY                                      | 69      | p53 signaling pathway                                      | 6                      | 2.07E-02 | 4.38E-02    |
| KEGG_PROSTATE_CANCER                                            | 89      | Prostate cancer                                            | 7                      | 2.15E-02 | 4.48E-02    |
| KEGG_STARCH_AND_SUCROSE_METABOLISM                              | 52      | Starch and sucrose metabolism                              | 5                      | 2.28E-02 | 4.71E-02    |
| KEGG_MELANOMA                                                   | 71      | Melanoma                                                   | 6                      | 2.35E-02 | 4.81E-02    |

**48h GW3965 down-regulated**

| Gene Set Name                                          | # Genes | Description                                                | # Genes in Overlap (k) | p-value  | FDR q-value |
|--------------------------------------------------------|---------|------------------------------------------------------------|------------------------|----------|-------------|
| KEGG_MAPK_SIGNALING_PATHWAY                            | 267     | MAPK signaling pathway                                     | 39                     | 4.69E-17 | 8.73E-15    |
| KEGG_PATHWAYS_IN_CANCER                                | 328     | Pathways in cancer                                         | 35                     | 2.13E-11 | 1.98E-09    |
| KEGG_P53_SIGNALING_PATHWAY                             | 69      | p53 signaling pathway                                      | 16                     | 6.71E-11 | 4.16E-09    |
| KEGG_BLADDER_CANCER                                    | 42      | Bladder cancer                                             | 12                     | 1.20E-09 | 5.56E-08    |
| KEGG_CELL_CYCLE                                        | 128     | Cell cycle                                                 | 19                     | 3.69E-09 | 1.37E-07    |
| KEGG_TGF_BETA_SIGNALING_PATHWAY                        | 86      | TGF-beta signaling pathway                                 | 14                     | 1.26E-07 | 3.91E-06    |
| KEGG_AMINOACYL_TRNA_BIOSYNTHESIS                       | 41      | Aminoacyl-tRNA biosynthesis                                | 9                      | 1.68E-06 | 4.47E-05    |
| KEGG_NEUROTROPHIN_SIGNALING_PATHWAY                    | 126     | Neurotrophin signaling pathway                             | 14                     | 1.35E-05 | 3.14E-04    |
| KEGG_RENAL_CELL_CARCINOMA                              | 70      | Renal cell carcinoma                                       | 10                     | 2.59E-05 | 4.93E-04    |
| KEGG_CYTOKINE_CYTOKINE_RECEPTOR_INTERACTION            | 267     | Cytokine-cytokine receptor interaction                     | 21                     | 2.65E-05 | 4.93E-04    |
| KEGG_CHRONIC_MYELOID_LEUKEMIA                          | 73      | Chronic myeloid leukemia                                   | 10                     | 3.76E-05 | 6.36E-04    |
| KEGG_PROSTATE_CANCER                                   | 89      | Prostate cancer                                            | 11                     | 4.15E-05 | 6.43E-04    |
| KEGG_NOD LIKE RECEPTOR SIGNALING PATHWAY               | 62      | NOD-like receptor signaling pathway                        | 9                      | 5.74E-05 | 8.21E-04    |
| KEGG_WNT_SIGNALING_PATHWAY                             | 151     | Wnt signaling pathway                                      | 14                     | 1.01E-04 | 1.34E-03    |
| KEGG_COMPLEMENT_AND_COAGULATION_CASCADES               | 69      | Complement and coagulation cascades                        | 9                      | 1.35E-04 | 1.67E-03    |
| KEGG_MELANOMA                                          | 71      | Melanoma                                                   | 9                      | 1.68E-04 | 1.96E-03    |
| KEGG_ERBB_SIGNALING_PATHWAY                            | 87      | ErbB signaling pathway                                     | 10                     | 1.70E-04 | 1.86E-03    |
| KEGG_COLORECTAL_CANCER                                 | 62      | Colorectal cancer                                          | 8                      | 3.40E-04 | 3.51E-03    |
| KEGG_CIRCADIAN_RHYTHM_MAMMAL                           | 13      | Circadian rhythm - mammal                                  | 4                      | 3.65E-04 | 3.57E-03    |
| KEGG_REGULATION_OF_ACTIN_CYTOSKELETON                  | 216     | Regulation of actin cytoskeleton                           | 16                     | 4.52E-04 | 4.12E-03    |
| KEGG_BASAL_TRANSCRIPTION_FACTORS                       | 36      | Basal transcription factors                                | 6                      | 4.65E-04 | 4.12E-03    |
| KEGG_NATURAL_KILLER_CELL_MEDIATED_CYTOTOXICITY         | 137     | Natural killer cell mediated cytotoxicity                  | 12                     | 5.20E-04 | 4.40E-03    |
| KEGG_FOCAL_ADHESION                                    | 201     | Focal adhesion                                             | 15                     | 6.22E-04 | 4.96E-03    |
| KEGG_EPITHELIAL_CELL_SIGNALING_IN_HELICOBACTER_PYLORI  | 68      | Epithelial cell signaling in Helicobacter pylori infection | 8                      | 6.40E-04 | 4.96E-03    |
| KEGG_GLYCOSPHINGOLIPID_BIOSYNTHESIS_LACTO_AND_NEOLACTO | 26      | Glycosphingolipid biosynthesis - lacto and neolacto se     | 5                      | 7.06E-04 | 5.25E-03    |
| KEGG_PANCREATIC_CANCER                                 | 70      | Pancreatic cancer                                          | 8                      | 7.78E-04 | 5.57E-03    |
| KEGG_HUNTINGTONS_DISEASE                               | 185     | Huntington's disease                                       | 14                     | 8.12E-04 | 5.59E-03    |
| KEGG_RIG_I LIKE RECEPTOR SIGNALING PATHWAY             | 71      | RIG-I-like receptor signaling pathway                      | 8                      | 8.56E-04 | 5.68E-03    |
| KEGG_AXON_GUIDANCE                                     | 129     | Axon guidance                                              | 11                     | 1.09E-03 | 7.01E-03    |
| KEGG_ADHERENS_JUNCTION                                 | 75      | Adherens junction                                          | 8                      | 1.23E-03 | 7.62E-03    |
| KEGG_LYSINE_DEGRADATION                                | 44      | Lysine degradation                                         | 6                      | 1.39E-03 | 8.36E-03    |
| KEGG_JAK_STAT_SIGNALING_PATHWAY                        | 155     | Jak-STAT signaling pathway                                 | 12                     | 1.54E-03 | 8.92E-03    |
| KEGG_ENDOCYTOSIS                                       | 183     | Endocytosis                                                | 13                     | 2.16E-03 | 1.22E-02    |
| KEGG_TOLL LIKE RECEPTOR SIGNALING PATHWAY              | 102     | Toll-like receptor signaling pathway                       | 9                      | 2.39E-03 | 1.31E-02    |
| KEGG_SMALL_CELL_LUNG_CANCER                            | 84      | Small cell lung cancer                                     | 8                      | 2.55E-03 | 1.35E-02    |
| KEGG_SPLICEOSOME                                       | 128     | Spliceosome                                                | 10                     | 3.44E-03 | 1.73E-02    |
| KEGG_T_CELL_RECEPTOR_SIGNALING_PATHWAY                 | 108     | T cell receptor signaling pathway                          | 9                      | 3.52E-03 | 1.73E-02    |
| KEGG_LONG_TERM_POTENTIATION                            | 70      | Long-term potentiation                                     | 7                      | 3.54E-03 | 1.73E-02    |
| KEGG_SNARE_INTERACTIONS_IN_VESICULAR_TRANSPORT         | 38      | SNARE interactions in vesicular transport                  | 5                      | 4.08E-03 | 1.93E-02    |
| KEGG_LEISHMANIA_INFECTIO                               | 72      | Leishmania infection                                       | 7                      | 4.15E-03 | 1.93E-02    |
| KEGG_B_CELL_RECEPTOR_SIGNALING_PATHWAY                 | 75      | B cell receptor signaling pathway                          | 7                      | 5.20E-03 | 2.36E-02    |
| KEGG_RNA_DEGRADATION                                   | 59      | RNA degradation                                            | 6                      | 6.23E-03 | 2.76E-02    |
| KEGG_ACUTE_MYELOID_LEUKEMIA                            | 60      | Acute myeloid leukemia                                     | 6                      | 6.76E-03 | 2.92E-02    |
| KEGG_THYROID_CANCER                                    | 29      | Thyroid cancer                                             | 4                      | 8.48E-03 | 3.58E-02    |
| KEGG_GLIOMA                                            | 65      | Glioma                                                     | 6                      | 9.92E-03 | 4.10E-02    |
| KEGG_ALANINE ASPARTATE AND GLUTAMATE METABOLISM        | 32      | Alanine, aspartate and glutamate metabolism                | 4                      | 1.20E-02 | 4.86E-02    |

**48h T0901317 up-regulated**

| Gene Set Name                                                 | # Genes | Description                                                | # Genes in Overlap (k) | p-value  | FDR q-value |
|---------------------------------------------------------------|---------|------------------------------------------------------------|------------------------|----------|-------------|
| KEGG_METABOLISM_OF_XENOBIOTICS_BY_CYTOCHROME_P45              | 70      | Metabolism of xenobiotics by cytochrome P450               | 18                     | 2.52E-13 | 4.70E-11    |
| KEGG_STEROID_BIOSYNTHESIS                                     | 17      | Steroid biosynthesis                                       | 10                     | 2.84E-12 | 2.64E-10    |
| KEGG_PPAR_SIGNALING_PATHWAY                                   | 69      | PPAR signaling pathway                                     | 16                     | 2.96E-11 | 1.84E-09    |
| KEGG_PORPHYRIN_AND_CHLOROPHYLL_METABOLISM                     | 41      | Porphyrin and chlorophyll metabolism                       | 12                     | 4.68E-10 | 2.18E-08    |
| KEGG_DRUG_METABOLISM_CYTOCHROME_P450                          | 72      | Drug metabolism - cytochrome P450                          | 15                     | 6.18E-10 | 2.30E-08    |
| KEGG_ARACHIDONIC_ACID_METABOLISM                              | 58      | Arachidonic acid metabolism                                | 13                     | 3.31E-09 | 1.03E-07    |
| KEGG_GLYCOLYSIS_GLUconeogenesis                               | 62      | Glycolysis / Gluconeogenesis                               | 13                     | 7.89E-09 | 1.93E-07    |
| KEGG_ASCORBATE_AND_ALDARATE_METABOLISM                        | 25      | Ascorbate and aldarate metabolism                          | 9                      | 9.11E-09 | 1.93E-07    |
| KEGG_STARCH_AND_SUCROSE_METABOLISM                            | 52      | Starch and sucrose metabolism                              | 12                     | 9.33E-09 | 1.93E-07    |
| KEGG_BUTANOATE_METABOLISM                                     | 34      | Butanoate metabolism                                       | 10                     | 1.27E-08 | 2.36E-07    |
| KEGG_STEROID_HORMONE_BIOSYNTHESIS                             | 55      | Steroid hormone biosynthesis                               | 12                     | 1.84E-08 | 3.12E-07    |
| KEGG_PENTOSE_AND_GLUCURONATE_INTERCONVERSIONS                 | 28      | Pentose and glucuronate interconversions                   | 9                      | 2.87E-08 | 4.44E-07    |
| KEGG_FATTY_ACID_METABOLISM                                    | 42      | Fatty acid metabolism                                      | 10                     | 1.17E-07 | 1.68E-06    |
| KEGG_PEROXISOME                                               | 78      | Peroxisome                                                 | 13                     | 1.41E-07 | 1.88E-06    |
| KEGG_LYSOSOME                                                 | 121     | Lysosome                                                   | 16                     | 1.52E-07 | 1.88E-06    |
| KEGG_RETINOL_METABOLISM                                       | 64      | Retinol metabolism                                         | 11                     | 9.35E-07 | 1.08E-05    |
| KEGG_MAPK_SIGNALING_PATHWAY                                   | 267     | MAPK signaling pathway                                     | 23                     | 9.83E-07 | 1.08E-05    |
| KEGG_TERPENOID_BACKBONE_BIOSYNTHESIS                          | 15      | Terpenoid backbone biosynthesis                            | 6                      | 1.44E-06 | 1.48E-05    |
| KEGG_ABC_TRANSPORTERS                                         | 44      | ABC transporters                                           | 9                      | 2.01E-06 | 1.87E-05    |
| KEGG_VALINE_LEUCINE_AND_Isoleucine_DEGRADATION                | 44      | Valine, leucine and isoleucine degradation                 | 9                      | 2.01E-06 | 1.87E-05    |
| KEGG_DRUG_METABOLISM_OTHER_ENZYMES                            | 51      | Drug metabolism - other enzymes                            | 9                      | 7.29E-06 | 6.45E-05    |
| KEGG_FC_GAMMA_R_MEDIATED_PHAGOCYTOSIS                         | 97      | Fc gamma R-mediated phagocytosis                           | 12                     | 1.07E-05 | 9.08E-05    |
| KEGG_INSULIN_SIGNALING_PATHWAY                                | 137     | Insulin signaling pathway                                  | 14                     | 1.90E-05 | 1.54E-04    |
| KEGG_PATHWAYS_IN_CANCER                                       | 328     | Pathways in cancer                                         | 23                     | 2.91E-05 | 2.25E-04    |
| KEGG_ENDOCYTOSIS                                              | 183     | Endocytosis                                                | 16                     | 3.51E-05 | 2.61E-04    |
| KEGG_GLYCEROPHOSPHOLIPID_METABOLISM                           | 77      | Glycerophospholipid metabolism                             | 10                     | 3.77E-05 | 2.70E-04    |
| KEGG_GLUTATHIONE_METABOLISM                                   | 50      | Glutathione metabolism                                     | 8                      | 4.92E-05 | 3.39E-04    |
| KEGG_ADIPOCYTOKINE_SIGNALING_PATHWAY                          | 67      | Adipocytokine signaling pathway                            | 9                      | 7.00E-05 | 4.65E-04    |
| KEGG_ARGININE_AND_PROLINE_METABOLISM                          | 54      | Arginine and proline metabolism                            | 8                      | 8.68E-05 | 5.57E-04    |
| KEGG_TYROSINE_METABOLISM                                      | 42      | Tyrosine metabolism                                        | 7                      | 1.12E-04 | 6.92E-04    |
| KEGG_ANTIGEN_PROCESSING_AND_PRESENTATION                      | 89      | Antigen processing and presentation                        | 10                     | 1.31E-04 | 7.87E-04    |
| KEGG_ETHER_LIPID_METABOLISM                                   | 33      | Ether lipid metabolism                                     | 6                      | 2.11E-04 | 1.19E-03    |
| KEGG_PROANOATE_METABOLISM                                     | 33      | Propanoate metabolism                                      | 6                      | 2.11E-04 | 1.19E-03    |
| KEGG_BASE_EXCISION_REPAIR                                     | 35      | Base excision repair                                       | 6                      | 2.95E-04 | 1.59E-03    |
| KEGG_NITROGEN_METABOLISM                                      | 23      | Nitrogen metabolism                                        | 5                      | 3.00E-04 | 1.59E-03    |
| KEGG_CALCIIUM_SIGNALING_PATHWAY                               | 178     | Calcium signaling pathway                                  | 14                     | 3.21E-04 | 1.66E-03    |
| KEGG_GNRH_SIGNALING_PATHWAY                                   | 101     | GnRH signaling pathway                                     | 10                     | 3.72E-04 | 1.87E-03    |
| KEGG_MELANOGENESIS                                            | 102     | Melanogenesis                                              | 10                     | 4.03E-04 | 1.97E-03    |
| KEGG_GLYCOSPHINGOLIPID_BIOSYNTHESIS_GANGLIO_SERIES            | 15      | Glycosphingolipid biosynthesis - ganglio series            | 4                      | 5.40E-04 | 2.58E-03    |
| KEGG_PYRUVATE_METABOLISM                                      | 40      | Pyruvate metabolism                                        | 6                      | 6.24E-04 | 2.90E-03    |
| KEGG_PENTOSE_PHOSPHATE_PATHWAY                                | 27      | Pentose phosphate pathway                                  | 5                      | 6.59E-04 | 2.99E-03    |
| KEGG_VIBRIO_CHOLERAE_INFECTION                                | 56      | Vibrio cholerae infection                                  | 7                      | 6.95E-04 | 3.02E-03    |
| KEGG_AXON_GUIDANCE                                            | 129     | Axon guidance                                              | 11                     | 6.97E-04 | 3.02E-03    |
| KEGG_WNT_SIGNALING_PATHWAY                                    | 151     | Wnt signaling pathway                                      | 12                     | 7.63E-04 | 3.23E-03    |
| KEGG_DILATED_CARDIOMYOPATHY                                   | 92      | Dilated cardiomyopathy                                     | 9                      | 7.88E-04 | 3.26E-03    |
| KEGG_ADHERENS_JUNCTION                                        | 75      | Adherens junction                                          | 8                      | 8.62E-04 | 3.48E-03    |
| KEGG_PHOSPHATIDYLINOSITOL_SIGNALING_SYSTEM                    | 76      | Phosphatidylinositol signaling system                      | 8                      | 9.41E-04 | 3.65E-03    |
| KEGG_VEGF_SIGNALING_PATHWAY                                   | 76      | VEGF signaling pathway                                     | 8                      | 9.41E-04 | 3.65E-03    |
| KEGG_VASCULAR_SMOOTH_MUSCLE_CONTRACTION                       | 115     | Vascular smooth muscle contraction                         | 10                     | 1.03E-03 | 3.90E-03    |
| KEGG_AMINO_SUGAR_AND_NUCLEOTIDE_SUGAR_METABOLISM              | 44      | Amino sugar and nucleotide sugar metabolism                | 6                      | 1.05E-03 | 3.90E-03    |
| KEGG_PHENYLALANINE_METABOLISM                                 | 18      | Phenylalanine metabolism                                   | 4                      | 1.14E-03 | 4.15E-03    |
| KEGG_GLYCEROLIPID_METABOLISM                                  | 49      | Glycerolipid metabolism                                    | 6                      | 1.86E-03 | 6.64E-03    |
| KEGG_HYPERTROPHIC_CARDIOMYOPATHY_HCM                          | 85      | Hypertrophic cardiomyopathy (HCM)                          | 8                      | 1.95E-03 | 6.77E-03    |
| KEGG_LIMONENE_AND_PINENE_DEGRADATION                          | 10      | Limonene and pinene degradation                            | 3                      | 1.97E-03 | 6.77E-03    |
| KEGG_CYTOKINE_CYTOKINE_RECEPTOR_INTERACTION                   | 267     | Cytokine-cytokine receptor interaction                     | 16                     | 2.34E-03 | 7.92E-03    |
| KEGG_BIOSYNTHESIS_OF_UNSATURATED_FATTY_ACIDS                  | 22      | Biosynthesis of unsaturated fatty acids                    | 4                      | 2.50E-03 | 8.29E-03    |
| KEGG_PANCREATIC_CANCER                                        | 70      | Pancreatic cancer                                          | 7                      | 2.61E-03 | 8.50E-03    |
| KEGG_NON_SMALL_CELL_LUNG_CANCER                               | 54      | Non-small cell lung cancer                                 | 6                      | 3.06E-03 | 9.82E-03    |
| KEGG_CELL_ADHESION_MOLECULES_CAMS                             | 134     | Cell adhesion molecules (CAMs)                             | 10                     | 3.23E-03 | 1.02E-02    |
| KEGG_BASAL_CELL_CARCINOMA                                     | 55      | Basal cell carcinoma                                       | 6                      | 3.36E-03 | 1.04E-02    |
| KEGG_SPHINGOLIPID_METABOLISM                                  | 40      | Sphingolipid metabolism                                    | 5                      | 4.04E-03 | 1.21E-02    |
| KEGG_TRYPTOPHAN_METABOLISM                                    | 40      | Tryptophan metabolism                                      | 5                      | 4.04E-03 | 1.21E-02    |
| KEGG_SULFUR_METABOLISM                                        | 13      | Sulfur metabolism                                          | 3                      | 4.41E-03 | 1.30E-02    |
| KEGG_GLYCOSPHINGOLIPID_BIOSYNTHESIS_LACTO_AND_NEOLACTO_SERIES | 26      | Glycosphingolipid biosynthesis - lacto and neolacto series | 4                      | 4.69E-03 | 1.36E-02    |
| KEGG_PATHOGENIC_ESCHERICHIA_COLI_INFECTION                    | 59      | Pathogenic Escherichia coli infection                      | 6                      | 4.78E-03 | 1.37E-02    |
| KEGG_FC_EPSILON_RI_SIGNALING_PATHWAY                          | 79      | Fc epsilon RI signaling pathway                            | 7                      | 5.13E-03 | 1.45E-02    |
| KEGG_HISTIDINE_METABOLISM                                     | 29      | Histidine metabolism                                       | 4                      | 7.00E-03 | 1.94E-02    |
| KEGG_GLIOMA                                                   | 65      | Glioma                                                     | 6                      | 7.66E-03 | 2.10E-02    |
| KEGG_O_GLYCAN_BIOSYNTHESIS                                    | 30      | O-Glycan biosynthesis                                      | 4                      | 7.91E-03 | 2.13E-02    |
| KEGG_TGF_BETA_SIGNALING_PATHWAY                               | 86      | TGF-beta signaling pathway                                 | 7                      | 8.11E-03 | 2.13E-02    |
| KEGG_OTHER_GLYCAN_DEGRADATION                                 | 16      | Other glycan degradation                                   | 3                      | 8.14E-03 | 2.13E-02    |
| KEGG_GLYCINE_SERINE_AND_THREONINE_METABOLISM                  | 31      | Glycine, serine and threonine metabolism                   | 4                      | 8.89E-03 | 2.30E-02    |
| KEGG_P53_SIGNALING_PATHWAY                                    | 69      | p53 signaling pathway                                      | 6                      | 1.02E-02 | 2.59E-02    |
| KEGG_GAP_JUNCTION                                             | 90      | Gap junction                                               | 7                      | 1.03E-02 | 2.59E-02    |
| KEGG_NATURAL_KILLER_CELL_MEDIATED_CYTOTOXICITY                | 137     | Natural killer cell mediated cytotoxicity                  | 9                      | 1.13E-02 | 2.81E-02    |
| KEGG_FRUCTOSE_AND_MANNOSE_METABOLISM                          | 34      | Fructose and mannose metabolism                            | 4                      | 1.23E-02 | 3.01E-02    |
| KEGG_REGULATION_OF_ACTIN_CYTOSKELETON                         | 216     | Regulation of actin cytoskeleton                           | 12                     | 1.36E-02 | 3.29E-02    |
| KEGG_INOSITOL_PHOSPHATE_METABOLISM                            | 54      | Inositol phosphate metabolism                              | 5                      | 1.43E-02 | 3.41E-02    |
| KEGG_ALZHEIMERS_DISEASE                                       | 169     | Alzheimer's disease                                        | 10                     | 1.56E-02 | 3.66E-02    |
| KEGG_ARRHYTHMOGENIC_RIGHT_VENTRICULAR_CARDIOMYOPATHY          | 76      | Arrhythmogenic right ventricular cardiomyopathy (ARVC)     | 6                      | 1.59E-02 | 3.69E-02    |
| KEGG_HEDGEHOG_SIGNALING_PATHWAY                               | 56      | Hedgehog signaling pathway                                 | 5                      | 1.66E-02 | 3.80E-02    |
| KEGG_BETA_ALANINE_METABOLISM                                  | 22      | beta-Alanine metabolism                                    | 3                      | 1.99E-02 | 4.51E-02    |
| KEGG_MISMATCH_REPAIR                                          | 23      | Mismatch repair                                            | 3                      | 2.24E-02 | 4.97E-02    |
| KEGG_PROXIMAL_TUBULE_BICARBONATE_RECLAMATION                  | 23      | Proximal tubule bicarbonate reclamation                    | 3                      | 2.24E-02 | 4.97E-02    |

**48h T0901317 down-regulated**

| Gene Set Name                                                   | # Genes | Description                                                | # Genes in Overlap (k) | p-value  | FDR q-value |
|-----------------------------------------------------------------|---------|------------------------------------------------------------|------------------------|----------|-------------|
| KEGG_MAPK_SIGNALING_PATHWAY                                     | 267     | MAPK signaling pathway                                     | 36                     | 1.77E-15 | 3.30E-13    |
| KEGG_PATHWAYS_IN_CANCER                                         | 328     | Pathways in cancer                                         | 37                     | 2.08E-13 | 1.94E-11    |
| KEGG_P53_SIGNALING_PATHWAY                                      | 69      | p53 signaling pathway                                      | 14                     | 3.32E-09 | 2.06E-07    |
| KEGG_CIRCADIAN_RHYTHM_MAMMAL                                    | 13      | Circadian rhythm - mammal                                  | 6                      | 5.15E-07 | 2.40E-05    |
| KEGG_AMINOACYL_TRNA_BIOSYNTHESIS                                | 41      | Aminoacyl-tRNA biosynthesis                                | 9                      | 1.07E-06 | 3.96E-05    |
| KEGG_BLADDER_CANCER                                             | 42      | Bladder cancer                                             | 9                      | 1.32E-06 | 4.10E-05    |
| KEGG_CELL_CYCLE                                                 | 128     | Cell cycle                                                 | 15                     | 1.76E-06 | 4.69E-05    |
| KEGG_TGF_BETA_SIGNALING_PATHWAY                                 | 86      | TGF-beta signaling pathway                                 | 12                     | 3.01E-06 | 6.08E-05    |
| KEGG_WNT_SIGNALING_PATHWAY                                      | 151     | Wnt signaling pathway                                      | 16                     | 3.09E-06 | 6.08E-05    |
| KEGG_CYTOKINE_CYTOKINE_RECEPTOR_INTERACTION                     | 267     | Cytokine-cytokine receptor interaction                     | 22                     | 3.48E-06 | 6.08E-05    |
| KEGG_CHRONIC_MYELOID_LEUKEMIA                                   | 73      | Chronic myeloid leukemia                                   | 11                     | 3.60E-06 | 6.08E-05    |
| KEGG_ENDOCYTOSIS                                                | 183     | Endocytosis                                                | 16                     | 3.51E-05 | 5.35E-04    |
| KEGG_NOD_LIKE_RECEPTOR_SIGNALING_PATHWAY                        | 62      | NOD-like receptor signaling pathway                        | 9                      | 3.74E-05 | 5.35E-04    |
| KEGG_JAK_STAT_SIGNALING_PATHWAY                                 | 155     | Jak-STAT signaling pathway                                 | 14                     | 7.48E-05 | 9.77E-04    |
| KEGG_EPITHELIAL_CELL_SIGNALING_IN_HELICOBACTER_PYLORI_INFECTION | 68      | Epithelial cell signaling in Helicobacter pylori infection | 9                      | 7.88E-05 | 9.77E-04    |
| KEGG_FOCAL_ADHESION                                             | 201     | Focal adhesion                                             | 16                     | 1.08E-04 | 1.18E-03    |
| KEGG_ERBB_SIGNALING_PATHWAY                                     | 87      | ErbB signaling pathway                                     | 10                     | 1.08E-04 | 1.18E-03    |
| KEGG_PROSTATE_CANCER                                            | 89      | Prostate cancer                                            | 10                     | 1.31E-04 | 1.35E-03    |
| KEGG_NEUROTROPHIN_SIGNALING_PATHWAY                             | 126     | Neurotrophin signaling pathway                             | 12                     | 1.45E-04 | 1.42E-03    |
| KEGG_ALANINE_ASPARTATE_AND_Glutamate_METABOLISM                 | 32      | Alanine, aspartate and glutamate metabolism                | 6                      | 1.76E-04 | 1.64E-03    |
| KEGG_ACUTE_MYELOID_LEUKEMIA                                     | 60      | Acute myeloid leukemia                                     | 8                      | 1.86E-04 | 1.64E-03    |
| KEGG_NOTCH_SIGNALING_PATHWAY                                    | 47      | Notch signaling pathway                                    | 7                      | 2.32E-04 | 1.96E-03    |
| KEGG_SMALL_CELL_LUNG_CANCER                                     | 84      | Small cell lung cancer                                     | 9                      | 4.03E-04 | 3.26E-03    |
| KEGG_RENAL_CELL_CARCINOMA                                       | 70      | Renal cell carcinoma                                       | 8                      | 5.42E-04 | 4.20E-03    |
| KEGG_AXON_GUIDANCE                                              | 129     | Axon guidance                                              | 11                     | 6.97E-04 | 5.19E-03    |
| KEGG_NATURAL_KILLER_CELL_MEDIATED_CYTOTOXICITY                  | 137     | Natural killer cell mediated cytotoxicity                  | 11                     | 1.15E-03 | 8.20E-03    |
| KEGG_GLYCINE_SERINE_AND_THREONINE_METABOLISM                    | 31      | Glycine, serine and threonine metabolism                   | 5                      | 1.27E-03 | 8.53E-03    |
| KEGG_COLORECTAL_CANCER                                          | 62      | Colorectal cancer                                          | 7                      | 1.28E-03 | 8.53E-03    |
| KEGG_CHEMOKINE_SIGNALING_PATHWAY                                | 190     | Chemokine signaling pathway                                | 13                     | 1.86E-03 | 1.19E-02    |
| KEGG_T_CELL_RECEPTOR_SIGNALING_PATHWAY                          | 108     | T cell receptor signaling pathway                          | 9                      | 2.44E-03 | 1.51E-02    |
| KEGG_LEISHMANIA_INFECTIOIN                                      | 72      | Leishmania infection                                       | 7                      | 3.06E-03 | 1.84E-02    |
| KEGG_ADHERENS_JUNCTION                                          | 75      | Adherens junction                                          | 7                      | 3.85E-03 | 2.17E-02    |
| KEGG_B_CELL_RECEPTOR_SIGNALING_PATHWAY                          | 75      | B cell receptor signaling pathway                          | 7                      | 3.85E-03 | 2.17E-02    |
| KEGG_MATURITY_ONSET_DIABETES_OF_THE_YOUNG                       | 25      | Maturity onset diabetes of the young                       | 4                      | 4.05E-03 | 2.20E-02    |
| KEGG_PHOSPHATIDYLIINOSITOL_SIGNALING_SYSTEM                     | 76      | Phosphatidylinositol signaling system                      | 7                      | 4.14E-03 | 2.20E-02    |
| KEGG_SPLICEOSOME                                                | 128     | Spliceosome                                                | 9                      | 7.44E-03 | 3.84E-02    |
| KEGG_GLIOMA                                                     | 65      | Glioma                                                     | 6                      | 7.66E-03 | 3.85E-02    |
| KEGG_APOPTOSIS                                                  | 88      | Apoptosis                                                  | 7                      | 9.16E-03 | 4.49E-02    |

**48h Rosiglitazone up-regulated**

| Gene Set Name                                     | # Genes | Description                                            | # Genes in Overlap (k) | p-value  | FDR q-value |
|---------------------------------------------------|---------|--------------------------------------------------------|------------------------|----------|-------------|
| KEGG_RETINOL_METABOLISM                           | 64      | Retinol metabolism                                     | 15                     | 1.05E-13 | 1.95E-11    |
| KEGG_PENTOSE_AND_GLCURONATE_INTERCONVERSIONS      | 28      | Pentose and glucuronate interconversions               | 11                     | 3.44E-13 | 3.20E-11    |
| KEGG_DRUG_METABOLISM_OTHER_ENZYMES                | 51      | Drug metabolism - other enzymes                        | 13                     | 1.44E-12 | 7.92E-11    |
| KEGG_PORPHYRIN_AND_CHLOROPHYLL_METABOLISM         | 41      | Porphyrin and chlorophyll metabolism                   | 12                     | 1.70E-12 | 7.92E-11    |
| KEGG_ASCORBATE_AND_ALDARATE_METABOLISM            | 25      | Ascorbate and aldarate metabolism                      | 10                     | 3.35E-12 | 1.25E-10    |
| KEGG_MAPK_SIGNALING_PATHWAY                       | 267     | MAPK signaling pathway                                 | 24                     | 2.12E-11 | 6.58E-10    |
| KEGG_STARCH_AND_SUCROSE_METABOLISM                | 52      | Starch and sucrose metabolism                          | 12                     | 3.78E-11 | 1.00E-09    |
| KEGG_DRUG_METABOLISM_CYTOCHROME_P450              | 72      | Drug metabolism - cytochrome P450                      | 13                     | 1.57E-10 | 3.64E-09    |
| KEGG_STEROID_HORMONE_BIOSYNTHESIS                 | 55      | Steroid hormone biosynthesis                           | 11                     | 1.29E-09 | 2.66E-08    |
| KEGG_METABOLISM_OF_XENOBIOTICS_BY_CYTOCHROME_P450 | 70      | Metabolism of xenobiotics by cytochrome P450           | 12                     | 1.49E-09 | 2.77E-08    |
| KEGG_PATHWAYS_IN_CANCER                           | 328     | Pathways in cancer                                     | 23                     | 7.01E-09 | 1.19E-07    |
| KEGG_PPAR_SIGNALING_PATHWAY                       | 69      | PPAR signaling pathway                                 | 11                     | 1.59E-08 | 2.47E-07    |
| KEGG_PHOSPHATIDYLINOSITOL_SIGNALING_SYSTEM        | 76      | Phosphatidylinositol signaling system                  | 10                     | 4.63E-07 | 6.62E-06    |
| KEGG_GLYCEROPHOSPHOLIPID_METABOLISM               | 77      | Glycerophospholipid metabolism                         | 10                     | 5.24E-07 | 6.96E-06    |
| KEGG_FOCAL_ADHESION                               | 201     | Focal adhesion                                         | 15                     | 1.32E-06 | 1.64E-05    |
| KEGG_GALACTOSE_METABOLISM                         | 26      | Galactose metabolism                                   | 6                      | 3.25E-06 | 3.78E-05    |
| KEGG_WNT_SIGNALING_PATHWAY                        | 151     | Wnt signaling pathway                                  | 12                     | 7.88E-06 | 8.62E-05    |
| KEGG_CALCIIUM_SIGNALING_PATHWAY                   | 178     | Calcium signaling pathway                              | 13                     | 8.38E-06 | 8.66E-05    |
| KEGG_AXON_GUIDANCE                                | 129     | Axon guidance                                          | 11                     | 9.59E-06 | 9.39E-05    |
| KEGG_FRUCTOSE_AND_MANNANOSE_METABOLISM            | 34      | Fructose and mannose metabolism                        | 6                      | 1.70E-05 | 1.58E-04    |
| KEGG_GLYCOSPHINGOLIPID_BIOSYNTHESIS_LACTO_AND_NEO | 26      | Glycosphingolipid biosynthesis - lacto and neolacto se | 5                      | 5.69E-05 | 5.04E-04    |
| KEGG_TGF_BETA_SIGNALING_PATHWAY                   | 86      | TGF-beta signaling pathway                             | 8                      | 8.47E-05 | 7.16E-04    |
| KEGG_P53_SIGNALING_PATHWAY                        | 69      | p53 signaling pathway                                  | 7                      | 1.36E-04 | 1.10E-03    |
| KEGG_GLYCEROLIPID_METABOLISM                      | 49      | Glycerolipid metabolism                                | 6                      | 1.44E-04 | 1.11E-03    |
| KEGG_PHENYLALANINE_METABOLISM                     | 18      | Phenylalanine metabolism                               | 4                      | 1.80E-04 | 1.34E-03    |
| KEGG_BUTANOATE_METABOLISM                         | 34      | Butanoate metabolism                                   | 5                      | 2.16E-04 | 1.55E-03    |
| KEGG_INOSITOL_PHOSPHATE_METABOLISM                | 54      | Inositol phosphate metabolism                          | 6                      | 2.47E-04 | 1.70E-03    |
| KEGG_MELANOGENESIS                                | 102     | Melanogenesis                                          | 8                      | 2.79E-04 | 1.85E-03    |
| KEGG_BETA_ALANINE_METABOLISM                      | 22      | beta-Alanine metabolism                                | 4                      | 4.09E-04 | 2.63E-03    |
| KEGG_ACUTE_MYELOID_LEUKEMIA                       | 60      | Acute myeloid leukemia                                 | 6                      | 4.42E-04 | 2.74E-03    |
| KEGG_COLORECTAL_CANCER                            | 62      | Colorectal cancer                                      | 6                      | 5.28E-04 | 3.17E-03    |
| KEGG_FATTY_ACID_METABOLISM                        | 42      | Fatty acid metabolism                                  | 5                      | 5.93E-04 | 3.45E-03    |
| KEGG_ADIPOCYTOKINE_SIGNALING_PATHWAY              | 67      | Adipocytokine signaling pathway                        | 6                      | 8.00E-04 | 4.51E-03    |
| KEGG_PENTOSE_PHOSPHATE_PATHWAY                    | 27      | Pentose phosphate pathway                              | 4                      | 9.21E-04 | 5.04E-03    |
| KEGG_NOTCH_SIGNALING_PATHWAY                      | 47      | Notch signaling pathway                                | 5                      | 1.00E-03 | 5.17E-03    |
| KEGG_TYPE_II_DIABETES_MELLITUS                    | 47      | Type II diabetes mellitus                              | 5                      | 1.00E-03 | 5.17E-03    |
| KEGG_SULFUR_METABOLISM                            | 13      | Sulfur metabolism                                      | 3                      | 1.10E-03 | 5.53E-03    |
| KEGG_LEISHMANIA_INFECTION                         | 72      | Leishmania infection                                   | 6                      | 1.17E-03 | 5.72E-03    |
| KEGG_LINOLEIC_ACID_METABOLISM                     | 29      | Linoleic acid metabolism                               | 4                      | 1.21E-03 | 5.79E-03    |
| KEGG_GLUTATHIONE_METABOLISM                       | 50      | Glutathione metabolism                                 | 5                      | 1.33E-03 | 6.17E-03    |
| KEGG_GNRH_SIGNALING_PATHWAY                       | 101     | GnRH signaling pathway                                 | 7                      | 1.38E-03 | 6.27E-03    |
| KEGG_TOLL_LIKE_RECEPTOR_SIGNALING_PATHWAY         | 102     | Toll-like receptor signaling pathway                   | 7                      | 1.46E-03 | 6.48E-03    |
| KEGG_PEROXISOME                                   | 78      | Peroxisome                                             | 6                      | 1.77E-03 | 7.66E-03    |
| KEGG_BASAL_CELL_CARCINOMA                         | 55      | Basal cell carcinoma                                   | 5                      | 2.04E-03 | 8.62E-03    |
| KEGG_ARACHIDONIC_ACID_METABOLISM                  | 58      | Arachidonic acid metabolism                            | 5                      | 2.58E-03 | 1.02E-02    |
| KEGG_ECM_RECEPTOR_INTERACTION                     | 84      | ECM-receptor interaction                               | 6                      | 2.58E-03 | 1.02E-02    |
| KEGG_SMALL_CELL_LUNG_CANCER                       | 84      | Small cell lung cancer                                 | 6                      | 2.58E-03 | 1.02E-02    |
| KEGG_VASCULAR_SMOOTH_MUSCLE_CONTRACTION           | 115     | Vascular smooth muscle contraction                     | 7                      | 2.90E-03 | 1.12E-02    |
| KEGG_ERBB_SIGNALING_PATHWAY                       | 87      | ErbB signaling pathway                                 | 6                      | 3.08E-03 | 1.17E-02    |
| KEGG_GLYCOLYSIS_GLUconeogenesis                   | 62      | Glycolysis / Gluconeogenesis                           | 5                      | 3.45E-03 | 1.26E-02    |
| KEGG_ALPHA_LINOLENIC_ACID_METABOLISM              | 19      | alpha-Linolenic acid metabolism                        | 3                      | 3.46E-03 | 1.26E-02    |
| KEGG_NEUROTROPHIN_SIGNALING_PATHWAY               | 126     | Neurotrophin signaling pathway                         | 7                      | 4.79E-03 | 1.64E-02    |
| KEGG_CYTOKINE_CYTOKINE_RECEPTOR_INTERACTION       | 267     | Cytokine-cytokine receptor interaction                 | 11                     | 4.82E-03 | 1.64E-02    |
| KEGG_ALDOSTERONE_REGULATED_SODIUM_REABSORPTION    | 42      | Aldosterone-regulated sodium reabsorption              | 4                      | 4.84E-03 | 1.64E-02    |
| KEGG_TYROSINE_METABOLISM                          | 42      | Tyrosine metabolism                                    | 4                      | 4.84E-03 | 1.64E-02    |
| KEGG_NEUROACTIVE_LIGAND_RECEPTOR_INTERACTION      | 272     | Neuroactive ligand-receptor interaction                | 11                     | 5.53E-03 | 1.84E-02    |
| KEGG_AMINO_SUGAR_AND_NUCLEOTIDE_SUGAR_METABOLISM  | 44      | Amino sugar and nucleotide sugar metabolism            | 4                      | 5.72E-03 | 1.86E-02    |
| KEGG_RENAL_CELL_CARCINOMA                         | 70      | Renal cell carcinoma                                   | 5                      | 5.81E-03 | 1.86E-02    |
| KEGG_CHRONIC_MYELOID_LEUKEMIA                     | 73      | Chronic myeloid leukemia                               | 5                      | 6.93E-03 | 2.18E-02    |
| KEGG_INSULIN_SIGNALING_PATHWAY                    | 137     | Insulin signaling pathway                              | 7                      | 7.50E-03 | 2.32E-02    |
| KEGG_FC_EPSILON_RI_SIGNALING_PATHWAY              | 79      | Fc epsilon RI signaling pathway                        | 5                      | 9.60E-03 | 2.93E-02    |
| KEGG_LIMONENE_AND_PINENE_DEGRADATION              | 10      | Limonene and pinene degradation                        | 2                      | 1.10E-02 | 3.30E-02    |
| KEGG_THYROID_CANCER                               | 29      | Thyroid cancer                                         | 3                      | 1.16E-02 | 3.41E-02    |
| KEGG_ARGININE_AND_PROLINE_METABOLISM              | 54      | Arginine and proline metabolism                        | 4                      | 1.17E-02 | 3.41E-02    |
| KEGG_APOPTOSIS                                    | 88      | Apoptosis                                              | 5                      | 1.48E-02 | 4.18E-02    |
| KEGG_HEMATOPOIETIC_CELL_LINEAGE                   | 88      | Hematopoietic cell lineage                             | 5                      | 1.48E-02 | 4.18E-02    |
| KEGG_PATHOGENIC_ESCHERICHIA_COLI_INFECTION        | 59      | Pathogenic Escherichia coli infection                  | 4                      | 1.58E-02 | 4.40E-02    |
| KEGG_GAP_JUNCTION                                 | 90      | Gap junction                                           | 5                      | 1.62E-02 | 4.43E-02    |
| KEGG_ETHER_LIPID_METABOLISM                       | 33      | Ether lipid metabolism                                 | 3                      | 1.65E-02 | 4.44E-02    |
| KEGG_DILATED_CARDIOMYOPATHY                       | 92      | Dilated cardiomyopathy                                 | 5                      | 1.77E-02 | 4.69E-02    |
| KEGG_CIRCADIAN_RHYTHM_MAMMAL                      | 13      | Circadian rhythm - mammal                              | 2                      | 1.85E-02 | 4.84E-02    |
| KEGG_CELL_CYCLE                                   | 128     | Cell cycle                                             | 6                      | 1.90E-02 | 4.90E-02    |

**48h Rosiglitazone down-regulated**

| Gene Set Name                                     | # Genes | Description                                            | # Genes in Overlap (k) | p-value  | FDR q-value |
|---------------------------------------------------|---------|--------------------------------------------------------|------------------------|----------|-------------|
| KEGG_PATHWAYS_IN_CANCER                           | 328     | Pathways in cancer                                     | 29                     | 1.74E-08 | 3.23E-06    |
| KEGG_CYTOKINE_CYTOKINE_RECEPTOR_INTERACTION       | 267     | Cytokine-cytokine receptor interaction                 | 23                     | 7.98E-07 | 4.94E-05    |
| KEGG_MAPK_SIGNALING_PATHWAY                       | 267     | MAPK signaling pathway                                 | 23                     | 7.98E-07 | 4.94E-05    |
| KEGG_AXON_GUIDANCE                                | 129     | Axon guidance                                          | 15                     | 1.68E-06 | 7.79E-05    |
| KEGG_MATURITY_ONSET_DIABETES_OF_THE_YOUNG         | 25      | Maturity onset diabetes of the young                   | 7                      | 2.72E-06 | 8.75E-05    |
| KEGG_TAURINE_AND_HYPOTAURINE_METABOLISM           | 10      | Taurine and hypotaurine metabolism                     | 5                      | 2.82E-06 | 8.75E-05    |
| KEGG_JAK_STAT_SIGNALING_PATHWAY                   | 155     | Jak-STAT signaling pathway                             | 16                     | 3.72E-06 | 9.88E-05    |
| KEGG_O_GLYCAN_BIOSYNTHESIS                        | 30      | O-Glycan biosynthesis                                  | 7                      | 1.03E-05 | 2.39E-04    |
| KEGG_WNT_SIGNALING_PATHWAY                        | 151     | Wnt signaling pathway                                  | 15                     | 1.18E-05 | 2.39E-04    |
| KEGG_SMALL_CELL_LUNG_CANCER                       | 84      | Small cell lung cancer                                 | 11                     | 1.28E-05 | 2.39E-04    |
| KEGG_LEUKOCYTE_TRANSENDOTHELIAL_MIGRATION         | 118     | Leukocyte transendothelial migration                   | 13                     | 1.47E-05 | 2.49E-04    |
| KEGG_ALANINE_ASPARTATE_AND GLUTAMATE METABOLISM   | 32      | Alanine, aspartate and glutamate metabolism            | 7                      | 1.62E-05 | 2.51E-04    |
| KEGG_CALCIIUM_SIGNALING_PATHWAY                   | 178     | Calcium signaling pathway                              | 16                     | 2.16E-05 | 3.09E-04    |
| KEGG_NICOTINATE_AND_NICOTINAMIDE_METABOLISM       | 24      | Nicotinate and nicotinamide metabolism                 | 6                      | 2.93E-05 | 3.90E-04    |
| KEGG_SELENOAMINO_ACID_METABOLISM                  | 26      | Selenoamino acid metabolism                            | 6                      | 4.80E-05 | 5.95E-04    |
| KEGG_MELANOGENESIS                                | 102     | Melanogenesis                                          | 11                     | 8.01E-05 | 9.31E-04    |
| KEGG_LYSOSOME                                     | 121     | Lysosome                                               | 12                     | 8.77E-05 | 9.59E-04    |
| KEGG_PHOSPHATIDYLINOSITOL_SIGNALING_SYSTEM        | 76      | Phosphatidylinositol signaling system                  | 9                      | 1.72E-04 | 1.78E-03    |
| KEGG_COMPLEMENT_AND_COAGULATION_CASCADES          | 69      | Complement and coagulation cascades                    | 8                      | 4.53E-04 | 4.21E-03    |
| KEGG_P53_SIGNALING_PATHWAY                        | 69      | p53 signaling pathway                                  | 8                      | 4.53E-04 | 4.21E-03    |
| KEGG_INOSITOL_PHOSPHATE_METABOLISM                | 54      | Inositol phosphate metabolism                          | 7                      | 5.16E-04 | 4.57E-03    |
| KEGG_CHEMOKINE_SIGNALING_PATHWAY                  | 190     | Chemokine signaling pathway                            | 14                     | 5.47E-04 | 4.63E-03    |
| KEGG_VIBRIO_CHOLERAE_INFECTION                    | 56      | Vibrio cholerae infection                              | 7                      | 6.46E-04 | 5.08E-03    |
| KEGG_REGULATION_OF_ACTIN_CYTOSKELETON             | 216     | Regulation of actin cytoskeleton                       | 15                     | 6.56E-04 | 5.08E-03    |
| KEGG_ARACHIDONIC_ACID_METABOLISM                  | 58      | Arachidonic acid metabolism                            | 7                      | 8.01E-04 | 5.96E-03    |
| KEGG_VEGF_SIGNALING_PATHWAY                       | 76      | VEGF signaling pathway                                 | 8                      | 8.69E-04 | 6.04E-03    |
| KEGG_HISTIDINE_METABOLISM                         | 29      | Histidine metabolism                                   | 5                      | 8.77E-04 | 6.04E-03    |
| KEGG_VASOPRESSIN_REGULATED_WATER_REABSORPTION     | 44      | Vasopressin-regulated water reabsorption               | 6                      | 9.84E-04 | 6.53E-03    |
| KEGG_FC_GAMMA_R_MEDIATED_PHAGOCYTOSIS             | 97      | Fc gamma R-mediated phagocytosis                       | 9                      | 1.06E-03 | 6.78E-03    |
| KEGG_ETHER_LIPID_METABOLISM                       | 33      | Ether lipid metabolism                                 | 5                      | 1.61E-03 | 9.97E-03    |
| KEGG_NEUROTROPHIN_SIGNALING_PATHWAY               | 126     | Neurotrophin signaling pathway                         | 10                     | 1.88E-03 | 1.13E-02    |
| KEGG_ERBB_SIGNALING_PATHWAY                       | 87      | ErbB signaling pathway                                 | 8                      | 2.09E-03 | 1.22E-02    |
| KEGG_DILATED_CARDIOMYOPATHY                       | 92      | Dilated cardiomyopathy                                 | 8                      | 2.97E-03 | 1.68E-02    |
| KEGG_CHRONIC_MYELOID_LEUKEMIA                     | 73      | Chronic myeloid leukemia                               | 7                      | 3.09E-03 | 1.68E-02    |
| KEGG_BASAL_CELL_CARCINOMA                         | 55      | Basal cell carcinoma                                   | 6                      | 3.16E-03 | 1.68E-02    |
| KEGG_PURINE_METABOLISM                            | 159     | Purine metabolism                                      | 11                     | 3.38E-03 | 1.74E-02    |
| KEGG_SULFUR_METABOLISM                            | 13      | Sulfur metabolism                                      | 3                      | 4.26E-03 | 2.14E-02    |
| KEGG_PYRIMIDINE_METABOLISM                        | 98      | Pyrimidine metabolism                                  | 8                      | 4.38E-03 | 2.14E-02    |
| KEGG_GLYCOSPHINGOLIPID_BIOSYNTHESIS_LACTO_AND_NEO | 26      | Glycosphingolipid biosynthesis - lacto and neolacto se | 4                      | 4.49E-03 | 2.14E-02    |
| KEGG_ALDOSTERONE_REGULATED_SODIUM_REABSORPTION    | 42      | Aldosterone-regulated sodium reabsorption              | 5                      | 4.74E-03 | 2.21E-02    |
| KEGG_COLORECTAL_CANCER                            | 62      | Colorectal cancer                                      | 6                      | 5.75E-03 | 2.61E-02    |
| KEGG_GLYCOSAMINOGLYCAN_BIOSYNTHESIS_KERATAN_SULFA | 15      | Glycosaminoglycan biosynthesis - keratan sulfate       | 3                      | 6.52E-03 | 2.89E-02    |
| KEGG_N_GLYCAN_BIOSYNTHESIS                        | 46      | N-Glycan biosynthesis                                  | 5                      | 7.01E-03 | 2.99E-02    |
| KEGG_HYPERTROPHIC_CARDIOMYOPATHY_HCM              | 85      | Hypertrophic cardiomyopathy (HCM)                      | 7                      | 7.15E-03 | 2.99E-02    |
| KEGG_GLIOMA                                       | 65      | Glioma                                                 | 6                      | 7.23E-03 | 2.99E-02    |
| KEGG_NOTCH_SIGNALING_PATHWAY                      | 47      | Notch signaling pathway                                | 5                      | 7.68E-03 | 3.11E-02    |
| KEGG_APOPTOSIS                                    | 88      | Apoptosis                                              | 7                      | 8.60E-03 | 3.40E-02    |
| KEGG_PROSTATE_CANCER                              | 89      | Prostate cancer                                        | 7                      | 9.13E-03 | 3.49E-02    |
| KEGG_CELL_ADHESION_MOLECULES_CAMS                 | 134     | Cell adhesion molecules (CAMs)                         | 9                      | 9.19E-03 | 3.49E-02    |
| KEGG_RENIN_ANGIOTENSIN_SYSTEM                     | 17      | Renin-angiotensin system                               | 3                      | 9.37E-03 | 3.49E-02    |
| KEGG_GLUTATHIONE_METABOLISM                       | 50      | Glutathione metabolism                                 | 5                      | 9.95E-03 | 3.63E-02    |
| KEGG_PANCREATIC_CANCER                            | 70      | Pancreatic cancer                                      | 6                      | 1.03E-02 | 3.68E-02    |
| KEGG_NATURAL_KILLER_CELL_MEDIATED_CYTOTOXICITY    | 137     | Natural killer cell mediated cytotoxicity              | 9                      | 1.05E-02 | 3.70E-02    |
| KEGG_LEISHMANIA_INFECTION                         | 72      | Leishmania infection                                   | 6                      | 1.17E-02 | 3.99E-02    |
| KEGG_BUTANOATE_METABOLISM                         | 34      | Butanoate metabolism                                   | 4                      | 1.18E-02 | 3.99E-02    |
| KEGG_ARGININE_AND_PROLINE_METABOLISM              | 54      | Arginine and proline metabolism                        | 5                      | 1.36E-02 | 4.45E-02    |
| KEGG_NON_SMALL_CELL_LUNG_CANCER                   | 54      | Non-small cell lung cancer                             | 5                      | 1.36E-02 | 4.45E-02    |
| KEGG_B_CELL_RECEPTOR_SIGNALING_PATHWAY            | 75      | B cell receptor signaling pathway                      | 6                      | 1.42E-02 | 4.54E-02    |
