# Supplementary material for: Distinct gene regulatory programs define the inhibitory effects of liver X receptors and PPARG on cancer cell proliferation
Source: Genome Med. 2016 Jul 11;8:74. doi: 10.1186/s13073-016-0328-6 (PMC4940857; doi:10.1186/s13073-016-0328-6)
Supplement: Additional file 3: Table S2. — (PDF 71 kb) [file 13073_2016_328_MOESM3_ESM.pdf]

| Rosiglitazone-GW3965 48 hr. up-regulated Pathways     |                                                                  |       |        |        |                                                                                                                                                                                                                                                                                                                                                                                                                                                                                   |            |          |           |                 |             |             |             |  |
|-------------------------------------------------------|------------------------------------------------------------------|-------|--------|--------|-----------------------------------------------------------------------------------------------------------------------------------------------------------------------------------------------------------------------------------------------------------------------------------------------------------------------------------------------------------------------------------------------------------------------------------------------------------------------------------|------------|----------|-----------|-----------------|-------------|-------------|-------------|--|
| Category                                              | Term                                                             | Count | %      | PValue | Genes                                                                                                                                                                                                                                                                                                                                                                                                                                                                             | List Total | Pop Hits | Pop Total | Fold Enrichment | Bonferroni  | Benjamini   | FDR         |  |
| INTERPRO                                              | IPR000892:Ribosomal protein S26e                                 | 2     | 2.0408 | 0.0083 | RPS26P35, RPS26P11                                                                                                                                                                                                                                                                                                                                                                                                                                                                | 70         | 2        | 16659     | 237.9857143     | 0.786482171 | 0.786482171 | 9.770194776 |  |
| PIR_SUPERFAMILY                                       | PIRSF002153:ribosomal protein S26                                | 2     | 2.0408 | 0.0094 | RPS26P35, RPS26P11                                                                                                                                                                                                                                                                                                                                                                                                                                                                | 36         | 2        | 7396      | 205.4444444     | 0.315801607 | 0.315801607 | 8.314242368 |  |
| GOTERM_MF_FAT                                         | GO:0030246~carbohydrate binding                                  | 6     | 6.1224 | 0.0144 | CLEC1A, KLRK1, FSTL1, PLA2R1, SOD3, HMMR<br>HAUS4, DLGAP1, MRPS23, NUP160, RPS26P11, FERMT3, FMR1, MYH7,<br>RAD9A, DPYSL2, PTPN20B, NCAPD3, DCAF12, RPS26P35, HIJURP,<br>HAUS4, DLGAP1, MRPS23, NUP160, RPS26P11, FERMT3, FMR1, MYH7,<br>RAD9A, DPYSL2, PTPN20B, NCAPD3, DCAF12, RPS26P35, HIJURP,                                                                                                                                                                                | 54         | 354      | 12983     | 4.075015694     | 0.938403675 | 0.938403675 | 16.53406313 |  |
| GOTERM_CC_FAT                                         | GO:0043232~intracellular non-membrane-bounded organelle          | 21    | 21.429 | 0.0181 | KRTAP4-7, PQBP1, PIWIL4, LMOD2, NFIB, MRPL44<br>HAUS4, DLGAP1, MRPS23, NUP160, RPS26P11, FERMT3, FMR1, MYH7,<br>RAD9A, DPYSL2, PTPN20B, NCAPD3, DCAF12, RPS26P35, HIJURP,                                                                                                                                                                                                                                                                                                         | 63         | 2596     | 12782     | 1.641242938     | 0.933962926 | 0.933962926 | 19.55094888 |  |
| GOTERM_CC_FAT                                         | GO:0043228~non-membrane-bounded organelle                        | 21    | 21.429 | 0.0181 | KRTAP4-7, PQBP1, PIWIL4, LMOD2, NFIB, MRPL44                                                                                                                                                                                                                                                                                                                                                                                                                                      | 63         | 2596     | 12782     | 1.641242938     | 0.933962926 | 0.933962926 | 19.55094888 |  |
| GOTERM_CC_FAT                                         | GO:0005840~ribosome                                              | 5     | 5.102  | 0.0203 | RPS26P35, MRPS23, RPS26P11, FMR1, MRPL44                                                                                                                                                                                                                                                                                                                                                                                                                                          | 63         | 215      | 12782     | 4.718346253     | 0.953078244 | 0.783385697 | 21.72194393 |  |
| GOTERM_BP_FAT                                         | GO:0008210~estrogen metabolic process                            | 2     | 2.0408 | 0.0406 | UGT1A7, HSD17B8                                                                                                                                                                                                                                                                                                                                                                                                                                                                   | 57         | 10       | 13528     | 47.46666667     | 0.999999997 | 0.999999997 | 44.7072844  |  |
| SP_PIR_KEYWORDS                                       | ribosomal protein                                                | 4     | 4.0816 | 0.041  | RPS26P35, MRPS23, RPS26P11, MRPL44                                                                                                                                                                                                                                                                                                                                                                                                                                                | 79         | 188      | 19235     | 5.180447078     | 0.999584721 | 0.999584721 | 40.45704136 |  |
| BIOCARTA                                              | beta-arrestins in GPCR Desensitization                           | 2     | 2.0408 | 0.0411 | ARRB1, C2ZORF40                                                                                                                                                                                                                                                                                                                                                                                                                                                                   | 6          | 12       | 1437      | 39.91666667     | 0.510215979 | 0.510215979 | 26.21483369 |  |
| GOTERM_BP_FAT                                         | GO:0006260~DNA replication                                       | 4     | 4.0816 | 0.0439 | CDC111, RAD9A, TK2, NFIB                                                                                                                                                                                                                                                                                                                                                                                                                                                          | 57         | 190      | 13528     | 4.996491228     | 0.999999999 | 0.999999999 | 47.3551741  |  |
| INTERPRO                                              | IPR018378:C-type lectin, conserved site                          | 3     | 3.0612 | 0.0454 | CLEC1A, KLRK1, PLA2R1                                                                                                                                                                                                                                                                                                                                                                                                                                                             | 70         | 82       | 16659     | 8.706794425     | 0.999823861 | 0.986728261 | 43.76219994 |  |
| INTERPRO                                              | IPR001304:C-type lectin                                          | 3     | 3.0612 | 0.0454 | CLEC1A, KLRK1, PLA2R1                                                                                                                                                                                                                                                                                                                                                                                                                                                             | 70         | 82       | 16659     | 8.706794425     | 0.999823861 | 0.986728261 | 43.76219994 |  |
| SMART                                                 | SM00034:CLECT                                                    | 3     | 3.0612 | 0.0481 | CLEC1A, KLRK1, PLA2R1                                                                                                                                                                                                                                                                                                                                                                                                                                                             | 40         | 82       | 9079      | 8.303963415     | 0.939492364 | 0.939942364 | 38.68099943 |  |
| GOTERM_BP_FAT                                         | GO:0016186:C-type lectin-like                                    | 3     | 3.0612 | 0.059  | CLEC1A, KLRK1, PLA2R1                                                                                                                                                                                                                                                                                                                                                                                                                                                             | 70         | 95       | 16659     | 7.515338346     | 0.999877994 | 0.976975717 | 52.92005666 |  |
| INTERPRO                                              | IPR018029:C2 membrane targeting protein                          | 3     | 3.0612 | 0.0715 | WWP1, PIK3C2B, SYT9                                                                                                                                                                                                                                                                                                                                                                                                                                                               | 70         | 106      | 16659     | 6.735444744     | 0.999989777 | 0.96819934  | 60.0850407  |  |
| SP_PIR_KEYWORDS                                       | cytoplasmic vesicle                                              | 4     | 4.0816 | 0.0725 | ARRB1, ESD, SYT9, RAB13                                                                                                                                                                                                                                                                                                                                                                                                                                                           | 79         | 238      | 19235     | 4.09117786      | 0.999095163 | 0.99085199  | 60.61458396 |  |
| SP_PIR_KEYWORDS                                       | methylation                                                      | 4     | 4.0816 | 0.0754 | FMR1, MYH7, PIWIL4, RAB13                                                                                                                                                                                                                                                                                                                                                                                                                                                         | 79         | 242      | 19235     | 4.024479548     | 0.999999531 | 0.992229346 | 62.10298317 |  |
| GOTERM_BP_FAT                                         | GO:0005976~polysaccharide metabolic process                      | 3     | 3.0612 | 0.0772 | GLT25D2, ITIH4, DSE<br>ESD, SYT9, C2ORF70, ZNF347, DSE, DUPD1, DCAF12, TSKS, GLT25D2,<br>WWP1, PQBP1, ITIH4, PIWIL4, MAPKBP1, ZCCHC8, SORDL, LYRM2,<br>ZCCHC11, FMR1, RAD9A, MYH7, SEL1L3, NCAPD3, CLEC1A, ZDHHC14,<br>SERPINB7, MRPL44, SLC7A6OS, NUP160, KLRK1, MFSD1, OR10G2,<br>HMMR, UGT1A7, SSX2B, HIJURP, DYRK3, PLA2R1, HSD17B8, DLGAP1,<br>OR8G5, C17ORF80, SLC6A16, DPYSL2, COL16A1, TSGA10IP, SOD3,                                                                    | 57         | 111      | 13528     | 6.414414414     | 1           | 0.999996673 | 68.2476095  |  |
| SP_PIR_KEYWORDS                                       | polymorphism                                                     | 54    | 55.102 | 0.0936 | CAPN1, CCDC111, NRAP, PDE7A, TREML2, C2ZORF40, MUC16                                                                                                                                                                                                                                                                                                                                                                                                                              | 79         | 11550    | 19235     | 1.138352786     | 0.999999989 | 0.989652852 | 70.40194614 |  |
| GOTERM_MF_FAT                                         | GO:0004857~enzyme inhibitor activity                             | 4     | 4.0816 | 0.0977 | ABCE1, ARRB1, SERPINB7, ITIH4                                                                                                                                                                                                                                                                                                                                                                                                                                                     | 54         | 270      | 12983     | 3.561865569     | 0.999999997 | 0.999948439 | 72.20704523 |  |
| Rosiglitazone-GW3965 48 hr. down-regulated Pathways   |                                                                  |       |        |        |                                                                                                                                                                                                                                                                                                                                                                                                                                                                                   |            |          |           |                 |             |             |             |  |
| Category                                              | Term                                                             | Count | %      | PValue | Genes                                                                                                                                                                                                                                                                                                                                                                                                                                                                             | List Total | Pop Hits | Pop Total | Fold Enrichment | Bonferroni  | Benjamini   | FDR         |  |
| GOTERM_CC_FAT                                         | GO:0005886~plasma membrane                                       | 16    | 21.622 | 0.0146 | JUB, ORS1D1, FLOT1, RRS2E2, NKAIN1, PCDH8B13, HCF2C, OR2V1,<br>SHANK3, SCFD1, KCNJ8, RRA52, GLP2R, CD6, PHLDA3, SEMA4A                                                                                                                                                                                                                                                                                                                                                            | 31         | 3777     | 12782     | 1.746667008     | 0.773332387 | 0.773332387 | 15.07645371 |  |
| UP_SEQ_FEATURE                                        | compositionally biased region:Poly-Arg                           | 4     | 4.5054 | 0.0184 | ASCL2, NBPF11, SYNP02, EPS8L1                                                                                                                                                                                                                                                                                                                                                                                                                                                     | 62         | 175      | 19113     | 7.046267281     | 0.988469608 | 0.988469608 | 21.33825438 |  |
| GOTERM_BP_FAT                                         | GO:0001701~in utero embryonic development                        | 4     | 4.5054 | 0.0194 | ASCL2, XRC2C, KLF1, FOXD3                                                                                                                                                                                                                                                                                                                                                                                                                                                         | 45         | 176      | 13528     | 6.832323232     | 0.999663198 | 0.999663198 | 23.9776484  |  |
| UP_SEQ_FEATURE                                        | domain:PDZ                                                       | 3     | 4.0541 | 0.0482 | PZD28, SYNP02, SHANK3                                                                                                                                                                                                                                                                                                                                                                                                                                                             | 62         | 110      | 19113     | 8.407478006     | 0.999992927 | 0.997340491 | 47.15483211 |  |
| SP_PIR_KEYWORDS                                       | nucleus                                                          | 20    | 27.027 | 0.0686 | GPS1, CPSF3L, JUB, TBL3, TSPY1, XRC2C, YY2, GINS4, GTF2IRD2,<br>ZNF648, SYNP02, HCF2C, PAD1A, ASCL2, GABBP1, POLD1F3, BRDT,<br>ZNF587, KLF1, FOXD3<br>PRR18, C1ORF174, TSPY1, XRC2C, ORS1D1, FAM3D, ADPGK, PCDH8B13,<br>HCF2C, LY9, MUDENG, GABBP1, C6ORF97, NKPD1, LRRCS6, ELOVL4,<br>LONRF3, GLP2R, CD6, PHLDA3, UNC45B, CDK13, TBL3, YY2, FLOT1,<br>NBPF11, GTF2IRD2, ORS2E2, ZNF648, SYNP02, PAD1A, PIH1D2,<br>SHANK3, CSORF32, SCFD1, PDZD8, DUSP1, KCNJ8, RRA52, BRDT, CPD, | 62         | 4283     | 19235     | 1.448713217     | 0.999895956 | 0.999895956 | 56.25299119 |  |
| UP_SEQ_FEATURE                                        | sequence variant                                                 | 45    | 60.811 | 0.0809 | KLF1, SEMA4A, EPS8L1                                                                                                                                                                                                                                                                                                                                                                                                                                                              | 62         | 11992    | 19113     | 1.156799425     | 0.999999998 | 0.998823324 | 66.32024654 |  |
| INTERPRO                                              | IPR001478:PDZ/DHR/GLGF                                           | 3     | 4.0541 | 0.0841 | PDZD8, SYNP02, SHANK3                                                                                                                                                                                                                                                                                                                                                                                                                                                             | 55         | 149      | 16659     | 6.09847468      | 0.999986987 | 0.999986987 | 63.96446271 |  |
| UP_SEQ_FEATURE                                        | compositionally biased region:Pro-rich                           | 7     | 9.4595 | 0.0849 | CSORF32, PRR18, PDZD8, SYNP02, KLF1, EPS8L1, SHANK3                                                                                                                                                                                                                                                                                                                                                                                                                               | 62         | 960      | 19113     | 2.247832661     | 0.999999999 | 0.995120814 | 68.17958423 |  |
| SMART                                                 | SM00228:PDZ                                                      | 3     | 4.0541 | 0.0913 | PDZD8, SYNP02, SHANK3                                                                                                                                                                                                                                                                                                                                                                                                                                                             | 32         | 149      | 9079      | 5.712458054     | 0.957618409 | 0.957618409 | 56.6601131  |  |
| GOTERM_BP_FAT                                         | GO:0043009~chordate embryonic development                        | 4     | 4.5054 | 0.0923 | ASCL2, XRC2C, KLF1, FOXD3                                                                                                                                                                                                                                                                                                                                                                                                                                                         | 45         | 331      | 13528     | 3.632896945     | 1           | 0.999999997 | 74.20644573 |  |
| GOTERM_BP_FAT                                         | GO:0009792~embryonic development ending in birth or egg hatching | 4     | 4.5054 | 0.0942 | ASCL2, XRC2C, KLF1, FOXD3<br>PRR18, C1ORF174, XRC2C, ORS1D1, TSPY1, FAM3D, ADPGK, PCDH8B13,<br>HCF2C, LY9, MUDENG, GABBP1, C6ORF97, NKPD1, LRRCS6, ELOVL4,<br>LONRF3, GLP2R, CD6, PHLDA3, UNC45B, CDK13, TBL3, YY2, FLOT1,<br>NBPF11, GTF2IRD2, ORS2E2, ZNF648, SYNP02, PAD1A, PIH1D2,<br>SHANK3, CSORF32, SCFD1, PDZD8, DUSP1, KCNJ8, BRDT, CPD, KLF1,                                                                                                                           | 45         | 334      | 13528     | 3.600266134     | 1           | 0.999998576 | 74.95895146 |  |
| SP_PIR_KEYWORDS                                       | polymorphism                                                     | 43    | 58.108 | 0.0999 | SEMA4A, EPS8L1                                                                                                                                                                                                                                                                                                                                                                                                                                                                    | 62         | 11550    | 19235     | 1.155013266     | 0.999998724 | 0.998870294 | 70.57991039 |  |
| Rosiglitazone-TO910317 48 hr. up-regulated Pathways   |                                                                  |       |        |        |                                                                                                                                                                                                                                                                                                                                                                                                                                                                                   |            |          |           |                 |             |             |             |  |
| Category                                              | Term                                                             | Count | %      | PValue | Genes                                                                                                                                                                                                                                                                                                                                                                                                                                                                             | List Total | Pop Hits | Pop Total | Fold Enrichment | Bonferroni  | Benjamini   | FDR         |  |
| UP_SEQ_FEATURE                                        | region of interest:Mediates transcriptional activation           | 2     | 0.5305 | 0.0063 | YY2, NPAT                                                                                                                                                                                                                                                                                                                                                                                                                                                                         | 41         | 3        | 19113     | 310.7804878     | 0.579949075 | 0.579949075 | 7.130395066 |  |
| GOTERM_BP_FAT                                         | GO:0046676~negative regulation of insulin secretion              | 2     | 0.5305 | 0.0272 | FAM3D, KCNQ1                                                                                                                                                                                                                                                                                                                                                                                                                                                                      | 32         | 12       | 13528     | 70.45833333     | 0.999966382 | 0.999966382 | 31.64044072 |  |
| GOTERM_BP_FAT                                         | GO:0002792~negative regulation of peptide secretion              | 2     | 0.5305 | 0.0272 | FAM3D, KCNQ1                                                                                                                                                                                                                                                                                                                                                                                                                                                                      | 32         | 12       | 13528     | 70.45833333     | 0.999966382 | 0.999966382 | 31.64044072 |  |
| GOTERM_BP_FAT                                         | GO:0051051~negative regulation of transport                      | 3     | 0.7958 | 0.0381 | PRKCA, FAM3D, KCNQ1                                                                                                                                                                                                                                                                                                                                                                                                                                                               | 32         | 135      | 13528     | 9.394444444     | 0.999999503 | 0.999294981 | 41.49242395 |  |
| BIOCARTA                                              | h_chemicalPathway:Apoptotic Signaling in Response to DNA Damage  | 2     | 0.5305 | 0.0453 | PRKCA, NPAT                                                                                                                                                                                                                                                                                                                                                                                                                                                                       | 4          | 22       | 1437      | 32.65909091     | 0.918005502 | 0.918005502 | 36.47547485 |  |
| GOTERM_BP_FAT                                         | GO:0046888~negative regulation of hormone secretion              | 2     | 0.5305 | 0.058  | FAM3D, KCNQ1                                                                                                                                                                                                                                                                                                                                                                                                                                                                      | 32         | 26       | 13528     | 32.51923077     | 1           | 0.999414513 | 56.15910946 |  |
| GOTERM_CC_FAT                                         | GO:0015030~Cajal body                                            | 2     | 0.5305 | 0.0584 | OIP5, NPAT                                                                                                                                                                                                                                                                                                                                                                                                                                                                        | 25         | 32       | 12782     | 31.955          | 0.99140791  | 0.99140791  | 47.19424142 |  |
| GOTERM_BP_FAT                                         | GO:0017148~negative regulation of translation                    | 2     | 0.5305 | 0.0751 | PRKCA, EIF2B3                                                                                                                                                                                                                                                                                                                                                                                                                                                                     | 32         | 34       | 13528     | 24.86764706     | 1           | 0.999325876 | 65.99447373 |  |
| GOTERM_BP_FAT                                         | GO:0051046~regulation of secretion                               | 3     | 0.7958 | 0.0778 | PRKCA, FAM3D, KCNQ1                                                                                                                                                                                                                                                                                                                                                                                                                                                               | 32         | 202      | 13528     | 6.278465347     | 1           | 0.997659854 | 67.32323282 |  |
| GOTERM_BP_FAT                                         | GO:0050796~regulation of insulin secretion                       | 2     | 0.5305 | 0.0878 | FAM3D, KCNQ1                                                                                                                                                                                                                                                                                                                                                                                                                                                                      | 32         | 40       | 13528     | 21.1375         | 1           | 0.996747753 | 71.89658358 |  |
| SP_PIR_KEYWORDS                                       | activator                                                        | 4     | 1.061  | 0.0931 | YY2, NPAT, KLF1, FOXD3                                                                                                                                                                                                                                                                                                                                                                                                                                                            | 41         | 520      | 19235     | 3.608818011     | 0.999988121 | 0.999988121 | 67.22107839 |  |
| KEGG_PATHWAY                                          | hsa05110~Vibrio cholerae infection                               | 2     | 0.5305 | 0.0949 | PRKCA, KCNQ1                                                                                                                                                                                                                                                                                                                                                                                                                                                                      | 10         | 56       | 5085      | 18.16071429     | 0.977410349 | 0.977410349 | 59.40069086 |  |
| Rosiglitazone-TO910317 48 hr. down-regulated Pathways |                                                                  |       |        |        |                                                                                                                                                                                                                                                                                                                                                                                                                                                                                   |            |          |           |                 |             |             |             |  |
| Category                                              | Term                                                             | Count | %      | PValue | Genes                                                                                                                                                                                                                                                                                                                                                                                                                                                                             | List Total | Pop Hits | Pop Total | Fold Enrichment | Bonferroni  | Benjamini   | FDR         |  |
| SP_PIR_KEYWORDS                                       | Lectin                                                           | 4     | 0.7207 | 0.0054 | CLEC1A, GALNT6, CLEC2A, PLA2R1<br>OSTF1, CLCN2, TSPY1, RAP1GAP, GALNT6, CYC1, UVVRAG, C2ORF70,<br>OR10G2, MUDENG, TSKS, ITGAX, HIJURP, SLC2A2, WWP1, CLEC2A,<br>ERAP1, QKI, GLP2R, PLA2R1, CD6, MAPKBP1, SORDL, ORS2E2,<br>C17ORF65, SEL1L3, COL16A1, SHANK3, CLEC1A, JSD1, DIO2, BNIP2,<br>MYH14, PRH0XNB, CRYZL1                                                                                                                                                                | 44         | 159      | 19235     | 10.99771298     | 0.52680824  | 0.52680824  | 6.14655106  |  |
| SP_PIR_KEYWORDS                                       | polymorphism                                                     | 35    | 6.3063 | 0.0067 | MYH14, PRH0XNB, CRYZL1                                                                                                                                                                                                                                                                                                                                                                                                                                                            | 44         | 11550    | 19235     | 1.324724518     | 0.605926735 | 0.372247449 | 7.591112033 |  |
| GOTERM_MF_FAT                                         | GO:0005529~sugar binding                                         | 4     | 0.7207 | 0.012  | CLEC1A, GALNT6, CLEC2A, PLA2R1                                                                                                                                                                                                                                                                                                                                                                                                                                                    | 33         | 195      | 12983     | 8.07024087      | 0.765567865 | 0.765567865 | 12.95673021 |  |
| SMART                                                 | SM00034:CLECT                                                    | 3     | 0.5405 | 0.0166 | CLEC1A, CLEC2A, PLA2R1                                                                                                                                                                                                                                                                                                                                                                                                                                                            | 23         | 82       | 9079      | 14.4167555      | 0.373444999 | 0.373444999 | 13.03651265 |  |
| UP_SEQ_FEATURE                                        | sequence variant                                                 | 35    | 6.3063 | 0.0169 | MYH14, PRH0XNB, CRYZL1                                                                                                                                                                                                                                                                                                                                                                                                                                                            | 44         | 11992    | 19113     | 1.267805431     | 0.960792535 | 0.960792535 | 19.09286645 |  |
| INTERPRO                                              | IPR018378:C-type lectin, conserved site                          | 3     | 0.5405 | 0.0173 | CLEC1A, CLEC2A, PLA2R1                                                                                                                                                                                                                                                                                                                                                                                                                                                            | 42         | 82       | 16659     | 14.51132404     | 0.843312301 | 0.843       |             |  |
